# Supplementary material for: Genetic Signature of Pinctada fucata Inferred from Population Genomics: Source Tracking of the Invasion in Mischief Reef of Nansha Islands
Source: MDPI journal article supplement (doi:10.3390/biology12010097), 2023-01-09
Supplement: s1 [file s1]

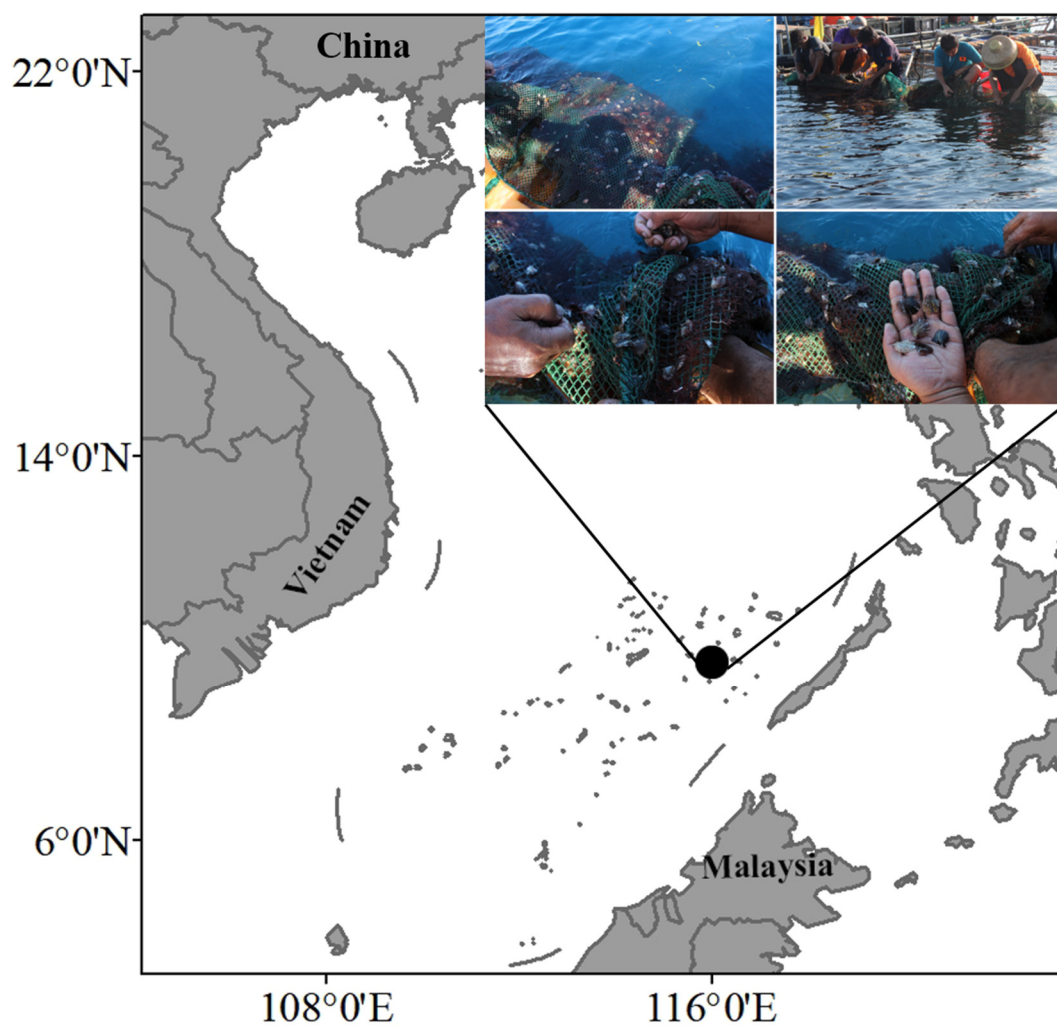

Figure S1. The occurrence of *P. fucata* in Mischief.

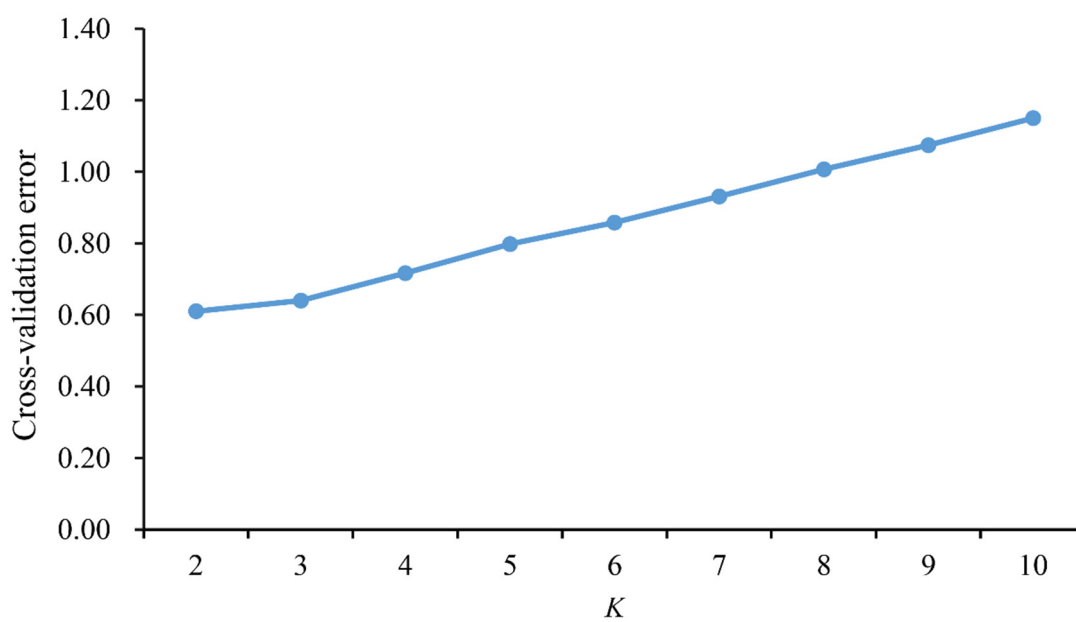

Figure S2. Cross-validation (CV) error calculated by structure analysis.
