# Supplementary material for: Genetic Signature of Pinctada fucata Inferred from Population Genomics: Source Tracking of the Invasion in Mischief Reef of Nansha Islands
Source: Biology (Basel). 2023 Jan 9;12(1):97. doi: 10.3390/biology12010097 (PMC9855575; doi:10.3390/biology12010097)
Supplement: Supplementary file 1 [file biology-12-00097-s001.zip › Supplementary Tables---Pinctada fucata.xlsx]

## Sheet: Table S1
Table S1. Clean reads statistics
Sample name	Number of clean reads	Base number of clean reads	Read length
Lingshui1	24758871	7229590332	142/150
Lingshui2	23206123	6776187916	142/150
Lingshui3	3183601	935978694	144/150
Lingshui4	24538819	7214412786	144/150
Lingshui5	20143117	5962362632	146/150
Lingshui6	4891806	1443082770	145/150
Lingshui7	25571000	7543445000	145/150
Lingshui8	25903526	7589733118	143/150
Lingshui9	11969988	3495236496	142/150
Lingshui10	24355863	7160623722	144/150
Lingshui11	22845153	6762165288	146/150
Lingshui12	842970	248676150	145/150
Lingshui13	2241458	661230110	145/150
Lingshui14	22955588	6725987284	143/150
Haiphong1	14360927	4222112538	144/150
Haiphong2	24196657	7138013815	145/150
Haiphong3	26888096	7931988320	145/150
Haiphong4	1668198	488782014	143/150
Haiphong5	20689208	6041248736	142/150
Haiphong6	17666240	5193874560	144/150
Haiphong7	1330869	388613748	142/150
Haiphong8	22329930	6564999420	144/150
Haiphong9	11682024	3457879104	146/150
Haiphong10	7625426	2241875244	144/150
Haiphong11	19782497	5796271621	143/150
Haiphong12	27454439	8016696188	142/150
Haiphong13	17319411	5057268012	142/150
Haiphong14	17826478	5205331576	142/150
Haiphong15	28223043	8297574642	144/150
Haiphong16	16367465	4812034710	144/150
Haiphong17	25560219	7514704386	144/150
Haiphong18	23493694	6954133424	146/150
Mischief1	15400694	4543204730	145/150
Mischief2	15745197	4613342721	143/150
Mischief3	15913062	4646614104	142/150
Mischief4	13613367	3975103164	142/150
Mischief5	18546501	5452671294	144/150
Mischief6	11308174	3335911330	145/150
Mischief7	12244660	3599930040	144/150
Mischief8	17161485	5045476590	144/150
Mischief9	22488300	6611560200	144/150
Mischief10	11381303	3357484385	145/150
Mischief11	17202176	5091844096	146/150
Mischief12	17832816	5260680720	145/150
Mischief13	20469081	6038378895	145/150
Mischief14	21513181	6303362033	143/150
Mischief15	22272783	6503652636	142/150
Mischief16	17560113	5127552996	142/150
Mischief17	13554037	4011994952	146/150
Mischief18	14154751	4175651545	145/150
Zhanjiang1	11244351	3283350492	142/150
Zhanjiang2	9773351	2873365194	144/150
Zhanjiang3	9520827	2799123138	144/150
Zhanjiang4	8358082	2473992272	146/150
Zhanjiang5	7594702	2240437090	145/150
Zhanjiang6	7945759	2343998905	145/150
Zhanjiang7	9695313	2840726709	143/150
Zhanjiang8	6761510	1974360920	142/150
Zhanjiang9	12249350	3576810200	142/150
Zhanjiang10	12506820	3677005080	144/150
Zhanjiang11	12249835	3576951820	142/150
Zhanjiang12	6787023	2002171785	145/150
Zhanjiang13	10476769	3090646855	145/150
Zhanjiang14	7716218	2260851874	143/150
Zhanjiang15	4486268	1309990256	142/150
Zhanjiang16	6587652	1923594384	142/150
Zhanjiang17	4871793	1432307142	144/150
Zhanjiang18	8658132	2545490808	144/150
Zhanjiang19	11338485	3322176105	143/150
Zhanjiang20	6234416	1839152720	145/150
Zhanjiang21	1015493	296523956	142/150
Zhanjiang22	5101433	1489618436	142/150
Zhanjiang23	8440509	2489950155	145/150
Zhanjiang24	9676349	2825493908	142/150

## Sheet: Table S2
Table S2. Genomic regions and genes under selection of Mischief population
	Number of genomic regions	Number of genes
FSTa	70	82
RODb	378	436

## Sheet: Table S3
Table S3. The information of potential selected genes
Chr	RegionStart	RegionEnd	RegionOrderNumber	BinNum	RegionLength	AverageTajimasD2	AverageFst	AverageROD	Gene	GeneStart	GeneEnd	Nr	KEGG	GO
PIN_chr3	18210000	18220000	94	1	10000	-1.37834	0.0481798	0.646353	Pma_10009738	18212964	18213578	XP_022294078.1/5.4e-43/uncharacterized protein LOC111104429 [Crassostrea virginica]	NA	NA
PIN_chr1	96645000	96655000	503	1	10000	-1.38103	0.0487339	0.613465	Pma_10018345	96653984	96657521	XP_022329783.1/8.5e-76/uncharacterized protein LOC111128463 [Crassostrea virginica]	rss:109442664/8.9e-20/caffeoyl-CoA O-methyltransferase 1; K00588 caffeoyl-CoA O-methyltransferase [EC:2.1.1.104]	NA
PIN_chr5	35550000	35565000	206	2	15000	-1.38136	0.133262	0.676643	Pma_10025230	35564265	35589570	XP_022340386.1/4.0e-159/anaphase-promoting complex subunit 7-like isoform X1 [Crassostrea virginica]	crg:105333859/1.0e-157/anaphase-promoting complex subunit 7-like; K03354 anaphase-promoting complex subunit 7	NA
PIN_chr2	17430000	17440000	102	1	10000	-1.38179	0.0467488	0.636895	Pma_10024042	17426714	17436362	XP_022340584.1/5.5e-59/fatty acid-binding protein, adipocyte-like isoform X2 [Crassostrea virginica]	myi:110453575/3.0e-36/fatty acid-binding protein, adipocyte-like; K08753 fatty acid-binding protein 4, adipocyte	molecular_function:GO:0008289//lipid binding;
PIN_chr6	10130000	10140000	52	1	10000	-1.38262	0.0419841	0.748053	Pma_10017686	10136533	10140492	XP_033724552.1/5.4e-57/uncharacterized protein LOC117314595 [Pecten maximus]	lgi:LOTGIDRAFT_237567/1.1e-12/hypothetical protein; K09488 TNF receptor-associated protein 1	NA
PIN_chr3	22510000	22540000	111	4	30000	-1.38366	0.0662179	0.758389	Pma_10005453	22520646	22535264	XP_021361157.1/6.1e-32/DC-STAMP domain-containing protein 2-like [Mizuhopecten yessoensis] >OWF55803.1 DC-STAMP domain-containing protein 2 [Mizuhopecten yessoensis]	myi:110455380/5.7e-33/DC-STAMP domain-containing protein 2-like; K22375 E3 ubiquitin-protein ligase DCST1 [EC:2.3.2.27]	cellular_component:GO:0016021//integral component of membrane;
PIN_chr3	22510000	22540000	111	4	30000	-1.38366	0.0662179	0.758389	Pma_10005454	22536733	22541024	XP_021361157.1/6.4e-94/DC-STAMP domain-containing protein 2-like [Mizuhopecten yessoensis] >OWF55803.1 DC-STAMP domain-containing protein 2 [Mizuhopecten yessoensis]	myi:110455380/6.0e-95/DC-STAMP domain-containing protein 2-like; K22375 E3 ubiquitin-protein ligase DCST1 [EC:2.3.2.27]	cellular_component:GO:0016021//integral component of membrane;
PIN_chr12	28525000	28535000	159	1	10000	-1.38505	0.0137715	0.651096	Pma_10027266	28524993	28525496	RXN01457.1/7.1e-33/Syntaxin-6 [Acipenser ruthenus]	NA	biological_process:GO:0007601//visual perception;cellular_component:GO:0033165//interphotoreceptor matrix;molecular_function:GO:0005201//extracellular matrix structural constituent;GO:0005540//hyaluronic acid binding;
PIN_chr12	28525000	28535000	159	1	10000	-1.38505	0.0137715	0.651096	Pma_211.106	28530610	28531086	NA	NA	NA
PIN_chr12	28525000	28535000	159	1	10000	-1.38505	0.0137715	0.651096	Pma_211.107	28532730	28533056	NA	NA	NA
PIN_chr4	51190000	51205000	312	2	15000	-1.38621	0.0830439	0.738423	Pma_10015022	51186760	51192221	XP_019138795.1/5.6e-11/uncharacterized protein LOC109144023 isoform X2 [Corvus cornix cornix]	NA	NA
PIN_chr5	26260000	26270000	155	1	10000	-1.38805	0.104023	0.696868	Pma_90.211	26259271	26260464	NA	NA	NA
PIN_chr2	9965000	9975000	61	1	10000	-1.38848	0.0386748	0.690672	Pma_10002751	9974166	9980240	PRD33848.1/7.7e-28/Atp5sl [Trichonephila clavipes]	spu:593766/3.6e-12/ATP synthase subunit s, mitochondrial; K07554 ATP synthase, H+ transporting, mitochondrial F0 complex, subunit s	NA
PIN_chr6	36530000	36545000	234	2	15000	-1.38913	0.0751937	0.632708	Pma_10010460	36532015	36540795	XP_021380280.1/1.8e-91/probable palmitoyltransferase ZDHHC12 [Mizuhopecten yessoensis] >XP_021380281.1 probable palmitoyltransferase ZDHHC12 [Mizuhopecten yessoensis] >XP_021380282.1 probable palmitoyltransferase ZDHHC12 [Mizuhopecten yessoensis] >XP_021380284.1 probable palmitoyltransferase ZDHHC12 [Mizuhopecten yessoensis] >XP_021380285.1 probable palmitoyltransferase ZDHHC12 [Mizuhopecten yess…	myi:110467438/1.6e-92/probable palmitoyltransferase ZDHHC12; K18932 palmitoyltransferase [EC:2.3.1.225]	cellular_component:GO:0016021//integral component of membrane;molecular_function:GO:0019706//protein-cysteine S-palmitoyltransferase activity;
PIN_chr2	2170000	2180000	16	1	10000	-1.46263	0.208548	0.794056	Pma_10002599	2136475	2186893	XP_011447626.1/0.0e+00/PREDICTED: AT-rich interactive domain-containing protein 4B [Crassostrea gigas]	crg:105342391/0.0e+00/AT-rich interactive domain-containing protein 4B; K19195 AT-rich interactive domain-containing protein 4B	cellular_component:GO:0005634//nucleus;molecular_function:GO:0003677//DNA binding;
PIN_chr7	5650000	5660000	42	1	10000	-1.38993	0.0394556	0.637587	Pma_10017484	5644190	5667816	XP_022310193.1/4.1e-186/LOW QUALITY PROTEIN: ciliogenesis-associated TTC17-interacting protein-like [Crassostrea virginica]	pss:102453799/1.2e-18/natural resistance-associated macrophage protein 1; K12347 natural resistance-associated macrophage protein 1	NA
PIN_chr5	34820000	34830000	203	1	10000	-1.39136	0.0744283	0.733063	Pma_10019716	34825511	34831244	XP_011446556.1/7.7e-39/PREDICTED: GTP-binding protein RAD [Crassostrea gigas]	myi:110459869/1.0e-33/uncharacterized protein LOC110459869; K07847 Rad and Gem related GTP binding protein 1	biological_process:GO:0007165//signal transduction;cellular_component:GO:0016020//membrane;molecular_function:GO:0005525//GTP binding;GO:0003924//GTPase activity;
PIN_chr3	46655000	46670000	246	2	15000	-1.39262	0.0392456	0.670208	Pma_10015328	46661901	46673122	NA	NA	NA
PIN_chr11	11450000	11460000	65	1	10000	-1.39405	0.0765283	0.618828	Pma_10025003	11442702	11458154	XP_021341567.1/2.6e-13/uncharacterized protein LOC110442335 [Mizuhopecten yessoensis]	NA	NA
PIN_chr7	1975000	1985000	13	1	10000	-1.39622	0.0914584	0.685476	Pma_10016385	1983338	1988897	XP_011449238.1/9.0e-80/PREDICTED: post-GPI attachment to proteins factor 3-like [Crassostrea gigas] >XP_019929015.1 PREDICTED: post-GPI attachment to proteins factor 3-like [Crassostrea gigas]	egl:EGR_06459/1.2e-29/Exocyst complex component; K19983 exocyst complex component 1	biological_process:GO:0006506//GPI anchor biosynthetic process;cellular_component:GO:0016021//integral component of membrane;GO:0000139//Golgi membrane;
PIN_chr7	1975000	1985000	13	1	10000	-1.39622	0.0914584	0.685476	Pma_10016386	1981295	1983157	XP_021342096.1/8.1e-33/post-GPI attachment to proteins factor 3-like [Mizuhopecten yessoensis] >XP_021342097.1 post-GPI attachment to proteins factor 3-like [Mizuhopecten yessoensis] >XP_021342098.1 post-GPI attachment to proteins factor 3-like [Mizuhopecten yessoensis] >XP_021342099.1 post-GPI attachment to proteins factor 3-like [Mizuhopecten yessoensis] >OWF35639.1 Post-GPI attachment to prote…	NA	biological_process:GO:0006506//GPI anchor biosynthetic process;cellular_component:GO:0016021//integral component of membrane;GO:0000139//Golgi membrane;
PIN_chr7	1975000	1985000	13	1	10000	-1.39622	0.0914584	0.685476	Pma_10016387	1970652	1975282	XP_011416243.1/1.3e-185/PREDICTED: kelch-like protein 10 [Crassostrea gigas]	crg:105320132/1.2e-186/kelch-like protein 10; K10448 kelch-like protein 10	NA
PIN_chr10	40010000	40025000	195	2	15000	-1.39779	0.00921061	0.741705	Pma_10029189	40014122	40034012	XP_022318910.1/4.6e-147/uncharacterized protein LOC111121771 [Crassostrea virginica]	crg:105338771/1.5e-145/origin recognition complex subunit 1-like; K02603 origin recognition complex subunit 1	biological_process:GO:0006260//DNA replication;cellular_component:GO:0005634//nucleus;molecular_function:GO:0003677//DNA binding;GO:0005524//ATP binding;GO:0003682//chromatin binding;
PIN_chr14	4745000	4760000	34	2	15000	-1.39779	0.105898	0.734644	Pma_10022532	4739476	4762671	KAB7498993.1/8.2e-69/hypothetical protein Anas_02733 [Armadillidium nasatum]	epa:110248627/1.2e-46/trafficking protein particle complex subunit 8-like; K20305 trafficking protein particle complex subunit 8	NA
PIN_chr13	12940000	12950000	68	1	10000	-1.39906	-0.00172828	0.731013	Pma_10011228	12924295	12946393	OWF50430.1/5.3e-27/Uncharacterized protein ORF50 [Mizuhopecten yessoensis]	sasa:106561767/2.0e-16/cep152; centrosomal protein 152; K16728 centrosomal protein CEP152	cellular_component:GO:0016021//integral component of membrane;
PIN_chr10	42540000	42550000	209	1	10000	-1.40021	0.0611851	0.661653	Pma_10028442	42549442	42550050	NA	NA	NA
PIN_chr12	24685000	24695000	142	1	10000	-1.40085	0.106126	0.66023	Pma_10024671	24685746	24689364	XP_019928431.1/4.8e-94/PREDICTED: uncharacterized protein LOC105342012 [Crassostrea gigas]	mze:106675363/3.2e-16/NACHT, LRR and PYD domains-containing protein 12; K12800 NACHT, LRR and PYD domains-containing protein 3	NA
PIN_chr11	18425000	18435000	112	1	10000	-1.40187	0.0122955	0.657398	Pma_10004722	18415283	18432859	XP_015041689.1/1.1e-235/LOW QUALITY PROTEIN: uncharacterized protein Dpse_GA31980 [Drosophila pseudoobscura pseudoobscura]	dpo:Dpse_GA31980/9.8e-237/uncharacterized protein; K10955 mucin-2	cellular_component:GO:0016021//integral component of membrane;
PIN_chr5	15090000	15105000	94	2	15000	-1.40209	0.0129429	0.641396	Pma_10015509	14972418	15118009	XP_011422988.1/3.8e-163/PREDICTED: uncharacterized protein LOC105325226 isoform X2 [Crassostrea gigas] >XP_019921494.1 PREDICTED: uncharacterized protein LOC105325226 isoform X2 [Crassostrea gigas] >XP_019921495.1 PREDICTED: uncharacterized protein LOC105325226 isoform X2 [Crassostrea gigas]	crg:105325226/3.5e-164/uncharacterized protein LOC105325226 isoform X1; K02599 Notch 1	NA
PIN_chr11	39630000	39640000	221	1	10000	-1.4024	0.0479811	0.619969	Pma_10001708	39625607	39646744	XP_022310522.1/7.6e-81/uncharacterized protein LOC111115901 [Crassostrea virginica]	NA	NA
PIN_chr2	49655000	49665000	279	1	10000	-1.40329	0.159665	0.776561	Pma_10019180	49646497	49659700	XP_011428682.1/1.9e-33/PREDICTED: organic cation transporter protein [Crassostrea gigas] >XP_011428683.1 PREDICTED: organic cation transporter protein [Crassostrea gigas]	crg:105329197/1.8e-34/organic cation transporter protein; K08202 MFS transporter, OCT family, solute carrier family 22 (organic cation transporter), member 4/5	cellular_component:GO:0016021//integral component of membrane;molecular_function:GO:0022857//transmembrane transporter activity;
PIN_chr5	25145000	25155000	146	1	10000	-1.40526	0.067978	0.67025	Pma_10015961	25144846	25147993	XP_011419821.1/2.3e-45/PREDICTED: barH-like 1 homeobox protein isoform X2 [Crassostrea gigas]	crg:105322670/2.1e-46/homeobox protein ceh-31 isoform X1; K09360 BarH-like	biological_process:GO:0006355//regulation of transcription, DNA-templated;cellular_component:GO:0005634//nucleus;molecular_function:GO:0043565//sequence-specific DNA binding;
PIN_chr2	53265000	53275000	300	1	10000	-1.40727	0.0487265	0.688248	Pma_10032447	53273108	53285073	XP_022336058.1/6.1e-15/mucin-2-like [Crassostrea virginica]	nfu:107388511/9.7e-08/LOW QUALITY PROTEIN: mucin-2-like; K10955 mucin-2	NA
PIN_chr2	53265000	53275000	300	1	10000	-1.40727	0.0487265	0.688248	Pma_10032448	53268986	53271230	XP_019921175.1/3.4e-11/PREDICTED: uncharacterized protein LOC109618265 [Crassostrea gigas]	crg:105337775/4.1e-07/sushi, von Willebrand factor type A, EGF and pentraxin domain-containing protein 1-like; K17495 CUB and sushi domain-containing protein	NA
PIN_chr6	45220000	45235000	291	2	15000	-1.40845	0.040645	0.657841	Pma_10019150	45230072	45276426	XP_021353175.1/1.3e-99/protein dispatched homolog 3-like [Mizuhopecten yessoensis] >OWF56167.1 Patched domain-containing protein 2 [Mizuhopecten yessoensis]	myi:110454695/3.5e-10/mucin-2-like; K10955 mucin-2	cellular_component:GO:0016021//integral component of membrane;
PIN_chr1	53170000	53185000	261	2	15000	-1.40893	0.10868	0.751236	Pma_10023482	53156558	53183730	XP_022313018.1/1.3e-198/eukaryotic translation initiation factor 3 subunit E-like [Crassostrea virginica] >XP_022313224.1 eukaryotic translation initiation factor 3 subunit E-like [Crassostrea virginica]	crg:105347464/8.4e-198/eukaryotic translation initiation factor 3 subunit E; K03250 translation initiation factor 3 subunit E	biological_process:GO:0001732//formation of cytoplasmic translation initiation complex;cellular_component:GO:0016282//eukaryotic 43S preinitiation complex;GO:0071540//eukaryotic translation initiation factor 3 complex, eIF3e;GO:0033290//eukaryotic 48S preinitiation complex;molecular_function:GO:0003743//translation initiation factor activity;
PIN_chr1	75615000	75625000	374	1	10000	-1.41017	0.0129105	0.642552	Pma_10021186	75623715	75629755	XP_011413956.1/1.6e-247/PREDICTED: uncharacterized protein LOC105318489 [Crassostrea gigas] >XP_011413957.1 PREDICTED: uncharacterized protein LOC105318489 [Crassostrea gigas] >XP_019918942.1 PREDICTED: uncharacterized protein LOC105318489 [Crassostrea gigas]	NA	cellular_component:GO:0016021//integral component of membrane;
PIN_chr9	82575000	82585000	435	1	10000	-1.41161	0.0056977	0.616286	Pma_10003075	82584641	82590726	XP_022331099.1/1.9e-59/perilipin-2-like isoform X1 [Crassostrea virginica]	crg:105348543/5.2e-60/perilipin-2 isoform X1; K17284 perilipin-2	NA
PIN_chr9	33175000	33185000	180	1	10000	-1.41364	0.0530965	0.617277	Pma_10005536	33180494	33222586	BAI49993.1/1.1e-185/N151 [Pinctada fucata]	spu:591574/5.8e-92/nucleolar and coiled-body phosphoprotein 1; K11294 nucleolin	cellular_component:GO:0005730//nucleolus;
PIN_chr9	53035000	53045000	276	1	10000	-1.41433	0.0417004	0.622811	Pma_399.418	53027703	53051288	NA	NA	NA
PIN_chr4	46345000	46355000	285	1	10000	-1.41545	0.0623796	0.62756	Pma_10023883	46336304	46384499	XP_011446532.1/1.3e-108/PREDICTED: uncharacterized protein LOC105341623 isoform X14 [Crassostrea gigas] >XP_011446533.1 PREDICTED: uncharacterized protein LOC105341623 isoform X14 [Crassostrea gigas]	NA	NA
PIN_chr3	43900000	43910000	230	1	10000	-1.41893	0.0301341	0.626923	Pma_10031325	43886271	43918860	ALK82329.1/3.7e-31/copper/zinc superoxide dismutase [Pinctada fucata]	NA	biological_process:GO:0006801//superoxide metabolic process;molecular_function:GO:0046872//metal ion binding;
PIN_chr7	11270000	11290000	70	2	20000	-1.41968	0.0581075	0.7038	Pma_10017135	11278720	11289014	XP_019930834.1/5.7e-100/PREDICTED: uncharacterized protein LOC105348151 [Crassostrea gigas]	crg:105317232/9.3e-37/uncharacterized protein LOC105317232 isoform X1; K04739 cAMP-dependent protein kinase regulator	NA
PIN_chr7	11270000	11290000	70	2	20000	-1.41968	0.0581075	0.7038	Pma_10017136	11289282	11309944	XP_011455767.2/5.1e-81/PREDICTED: ADP-ribosylation factor-like protein 5B [Crassostrea gigas]	crg:105348148/4.7e-82/ADP-ribosylation factor-like protein 5B; K07950 ADP-ribosylation factor-like protein 5B	molecular_function:GO:0005525//GTP binding;
PIN_chr4	605000	615000	4	1	10000	-1.42511	0.138215	0.618924	Pma_10002083	614580	658854	XP_033754450.1/1.9e-169/uncharacterized protein LOC117337534 [Pecten maximus]	myi:110443801/2.1e-115/uncharacterized protein LOC110443801; K14616 cubilin	NA
PIN_chr7	18980000	18995000	104	2	15000	-1.6842	0.177386	0.662402	Pma_10003133	18988561	19001787	XP_022307343.1/1.7e-32/polycystic kidney disease 1-related protein-like isoform X1 [Crassostrea virginica]	myi:110443309/5.9e-20/uncharacterized protein LOC110443309 isoform X1; K04987 polycystin 1L1	NA
PIN_chr6	52755000	52765000	332	1	10000	-1.4291	0.13734	0.668487	Pma_10018628	52697617	52759831	XP_022323366.1/1.2e-182/sodium- and chloride-dependent glycine transporter 1-like [Crassostrea virginica]	crg:105338903/1.8e-181/sodium- and chloride-dependent glycine transporter 1; K05038 solute carrier family 6 (neurotransmitter transporter, glycine) member 5/9	cellular_component:GO:0016021//integral component of membrane;molecular_function:GO:0005328//neurotransmitter:sodium symporter activity;
PIN_chr6	52755000	52765000	332	1	10000	-1.4291	0.13734	0.668487	Pma_510.73	52742417	52774474	NA	NA	NA
PIN_chr3	74210000	74225000	387	2	15000	-1.43083	0.0683333	0.804435	Pma_10002736	74209572	74211500	XP_022309570.1/5.0e-55/uncharacterized protein LOC111115203 isoform X1 [Crassostrea virginica] >XP_022309579.1 uncharacterized protein LOC111115203 isoform X1 [Crassostrea virginica]	NA	NA
PIN_chr4	56605000	56620000	341	2	15000	-1.43349	0.140877	0.69733	Pma_10013883	56613285	56615094	VFV23863.1/7.0e-10/Hypothetical predicted protein [Lynx pardinus]	bim:100748207/6.3e-06/E3 ubiquitin-protein ligase HERC2; K10595 E3 ubiquitin-protein ligase HERC2 [EC:2.3.2.26]	cellular_component:GO:0016021//integral component of membrane;
PIN_chr2	4125000	4135000	22	1	10000	-1.43523	0.0147667	0.656863	Pma_10015709	4115861	4129018	XP_033734154.1/9.8e-108/rho-related GTP-binding protein RhoU-like [Pecten maximus]	myi:110449966/1.3e-107/cell division control protein 42 homolog; K07865 Ras homolog gene family, member U	biological_process:GO:0007264//small GTPase mediated signal transduction;molecular_function:GO:0005525//GTP binding;GO:0003924//GTPase activity;
PIN_chr14	30860000	30885000	184	4	25000	-1.43609	0.0168217	0.665023	Pma_10013378	30862111	30863799	XP_022304456.1/2.5e-34/protein wech-like [Crassostrea virginica]	crg:105319442/6.4e-33/E3 ubiquitin-protein ligase TRIM71; K11997 tripartite motif-containing protein 2/3	NA
PIN_chr11	12120000	12130000	67	1	10000	-1.69473	0.258161	0.812541	Pma_10005733	12129625	12131163	XP_033743763.1/9.0e-63/beta-1,3-galactosyltransferase brn-like [Pecten maximus] >XP_033743764.1 beta-1,3-galactosyltransferase brn-like [Pecten maximus] >XP_033743765.1 beta-1,3-galactosyltransferase brn-like [Pecten maximus]	myi:110440246/1.6e-62/beta-1,3-galactosyltransferase brn-like; K02175 putative enzyme (brainiac)	biological_process:GO:0006486//protein glycosylation;cellular_component:GO:0016021//integral component of membrane;GO:0000139//Golgi membrane;molecular_function:GO:0016757//transferase activity, transferring glycosyl groups;
PIN_chr5	54415000	54425000	324	1	10000	-1.43874	0.0250182	0.617232	Pma_10025856	54411413	54425248	XP_033763726.1/4.4e-121/vacuolar protein sorting-associated protein 52 homolog [Pecten maximus]	myi:110454884/1.5e-121/vacuolar protein sorting-associated protein 52 homolog; K20298 vacuolar protein sorting-associated protein 52	NA
PIN_chr6	4695000	4710000	27	2	15000	-1.44293	0.0418056	0.660866	Pma_10032319	4677761	4696128	XP_033763714.1/1.7e-144/alkaline phosphatase-like [Pecten maximus]	crg:105341299/2.6e-140/alkaline phosphatase; K01077 alkaline phosphatase [EC:3.1.3.1]	cellular_component:GO:0016021//integral component of membrane;molecular_function:GO:0016791//phosphatase activity;
PIN_chr6	4695000	4710000	27	2	15000	-1.44293	0.0418056	0.660866	Pma_10032320	4707368	4723926	XP_015752345.1/5.1e-62/PREDICTED: RNA-directed DNA polymerase from mobile element jockey-like [Acropora digitifera]	aqu:100633263/4.2e-19/uncharacterized protein LOC100633263; K00306 sarcosine oxidase / L-pipecolate oxidase [EC:1.5.3.1 1.5.3.7]	cellular_component:GO:0016021//integral component of membrane;molecular_function:GO:0003964//RNA-directed DNA polymerase activity;
PIN_chr1	64870000	64885000	325	2	15000	-1.44323	0.0125089	0.729444	Pma_10016235	64869964	64896458	XP_022318573.1/0.0e+00/helicase with zinc finger domain 2-like [Crassostrea virginica] >XP_022318574.1 helicase with zinc finger domain 2-like [Crassostrea virginica]	lak:106159544/4.0e-42/regulator of nonsense transcripts 1; K14326 regulator of nonsense transcripts 1 [EC:3.6.4.-]	NA
PIN_chr1	78010000	78020000	367	1	10000	-1.38981	0.234285	0.763744	Pma_10005771	78011016	78030996	XP_022291367.1/2.2e-58/uncharacterized protein LOC111102787 isoform X2 [Crassostrea virginica]	adf:107329028/3.6e-16/dual serine/threonine and tyrosine protein kinase-like; K16288 dual serine/threonine and tyrosine protein kinase [EC:2.7.12.1]	NA
PIN_chr4	16265000	16275000	92	1	10000	-1.44944	0.0716447	0.679089	Pma_10014017	16263017	16269478	Q4KTY1.1/8.2e-240/RecName: Full=Serine/threonine-protein kinase H1 homolog [Pinctada fucata] >AAX19940.1 protein serine kinase [Pinctada fucata]	myi:110443246/3.6e-206/serine/threonine-protein kinase H1 homolog; K08808 protein serine kinase H [EC:2.7.11.1]	molecular_function:GO:0004674//protein serine/threonine kinase activity;GO:0005524//ATP binding;
PIN_chr14	40850000	40865000	232	2	15000	-1.44975	0.0303923	0.634353	Pma_10002754	40863994	40872148	XP_033743474.1/1.2e-06/uncharacterized protein LOC117329576 [Pecten maximus]	NA	NA
PIN_chr10	56695000	56710000	280	2	15000	-1.44992	0.0545458	0.818403	Pma_10019339	56678165	56695607	XP_022343276.1/4.1e-97/uncharacterized membrane protein C776.05-like isoform X2 [Crassostrea virginica]	NA	cellular_component:GO:0016021//integral component of membrane;
PIN_chr10	56695000	56710000	280	2	15000	-1.44992	0.0545458	0.818403	Pma_10019340	56699721	56717009	XP_022342989.1/5.4e-97/transcription termination factor 2-like isoform X2 [Crassostrea virginica]	crg:105339697/3.9e-95/transcription termination factor 2; K15173 transcription termination factor 2 [EC:3.6.4.-]	molecular_function:GO:0005524//ATP binding;
PIN_chr1	17780000	17790000	107	1	10000	-1.45173	0.0105868	0.626067	Pma_10004951	17785365	17807690	XP_022184507.1/4.9e-50/uncharacterized protein LOC111043769 [Nilaparvata lugens]	haw:110382348/6.6e-34/microtubule-associated protein futsch-like; K10429 microtubule-associated protein 1	NA
PIN_chr5	7475000	7490000	44	2	15000	-1.45196	-0.00999521	0.690428	Pma_74.209	7478262	7479239	NA	NA	NA
PIN_chr5	7475000	7490000	44	2	15000	-1.45196	-0.00999521	0.690428	Pma_74.218	7487727	7488164	NA	NA	NA
PIN_chr5	28055000	28065000	167	1	10000	-1.45395	0.100661	0.691743	Pma_10021569	28045868	28069305	XP_033730086.1/3.5e-201/uncharacterized protein LOC117319374 [Pecten maximus]	amex:111197650/5.9e-127/uncharacterized protein LOC111197650 isoform X1; K02366 glucuronyl/N-acetylglucosaminyl transferase EXT1 [EC:2.4.1.224 2.4.1.225]	NA
PIN_chr4	33680000	33690000	210	1	10000	-1.45639	0.132662	0.788493	Pma_10012063	33683300	33684010	XP_021355484.1/3.7e-19/alpha-crystallin B chain-like [Mizuhopecten yessoensis]	sko:100371573/4.2e-10/alpha-crystallin A chain-like; K09542 crystallin, alpha B	NA
PIN_chr10	935000	945000	3	1	10000	-1.45655	0.101264	0.640085	Pma_10017840	928161	965630	PIC31254.1/8.0e-13/hypothetical protein B9Z55_012014 [Caenorhabditis nigoni]	myi:110447225/2.8e-13/mucin-2-like; K10955 mucin-2	NA
PIN_chr14	23110000	23120000	130	1	10000	-1.45656	0.00742393	0.637348	Pma_10007976	23106039	23113228	XP_011433329.1/5.6e-41/PREDICTED: uncharacterized protein LOC105332421 [Crassostrea gigas]	NA	NA
PIN_chr14	23110000	23120000	130	1	10000	-1.45656	0.00742393	0.637348	Pma_10007977	23119293	23132586	XP_011448475.1/1.4e-91/PREDICTED: uncharacterized protein LOC105343018 isoform X2 [Crassostrea gigas]	NA	NA
PIN_chr11	18280000	18290000	111	1	10000	-1.45665	0.170164	0.662216	Pma_10010261	18279382	18286954	XP_022342130.1/4.3e-125/nuclear pore complex protein Nup88-like [Crassostrea virginica]	crg:105324858/1.9e-123/nuclear pore complex protein Nup88; K14318 nuclear pore complex protein Nup88	biological_process:GO:0000055//ribosomal large subunit export from nucleus;GO:0000056//ribosomal small subunit export from nucleus;molecular_function:GO:0017056//structural constituent of nuclear pore;
PIN_chr3	13220000	13235000	64	2	15000	-1.45898	0.0612213	0.683583	Pma_10010757	13219485	13232545	XP_011419679.1/1.3e-102/PREDICTED: alpha-L-fucosidase [Crassostrea gigas] >XP_011419680.1 PREDICTED: alpha-L-fucosidase [Crassostrea gigas]	crg:105322568/1.2e-103/alpha-L-fucosidase; K01206 alpha-L-fucosidase [EC:3.2.1.51]	biological_process:GO:0006004//fucose metabolic process;molecular_function:GO:0004560//alpha-L-fucosidase activity;
PIN_chr1	78875000	78885000	402	1	10000	-1.45915	0.0310537	0.671368	Pma_575.595	78881231	78882665	NA	NA	NA
PIN_chr2	41405000	41415000	229	1	10000	-1.4612	0.0129775	0.758739	Pma_10030106	41413947	41435255	EEC13617.1/1.8e-09/conserved hypothetical protein, partial [Ixodes scapularis]	NA	NA
PIN_chr12	39950000	39960000	226	1	10000	-1.46184	0.0387829	0.650004	Pma_10010400	39950467	39953491	XP_011442864.1/2.4e-123/PREDICTED: patched domain-containing protein 3 [Crassostrea gigas]	myi:110459683/2.9e-31/Niemann-Pick C1 protein-like; K12385 Niemann-Pick C1 protein	cellular_component:GO:0016021//integral component of membrane;
PIN_chr12	39950000	39960000	226	1	10000	-1.46184	0.0387829	0.650004	Pma_10010401	39953617	39954336	XP_033734653.1/7.7e-65/patched domain-containing protein 3-like [Pecten maximus] >XP_033734654.1 patched domain-containing protein 3-like [Pecten maximus]	bter:100650737/7.5e-31/Niemann-Pick C1 protein isoform X4; K12385 Niemann-Pick C1 protein	cellular_component:GO:0016021//integral component of membrane;
PIN_chr10	48105000	48120000	235	2	15000	-1.46262	0.0208547	0.679874	Pma_10028942	48117692	48127779	XP_022309562.1/2.5e-51/uncharacterized protein LOC111115199 isoform X1 [Crassostrea virginica]	NA	NA
PIN_chr3	48020000	48030000	215	1	10000	-1.43659	0.159267	0.731878	Pma_10006567	48025906	48033827	XP_022344378.1/4.7e-85/protein lin-7 homolog C-like [Crassostrea virginica]	crg:105344657/4.4e-86/protein lin-7 homolog C; K19931 protein lin-7	biological_process:GO:0007269//neurotransmitter secretion;GO:0015031//protein transport;GO:0006887//exocytosis;cellular_component:GO:0097025//MPP7-DLG1-LIN7 complex;GO:0016323//basolateral plasma membrane;GO:0098793//presynapse;molecular_function:GO:0097016//L27 domain binding;
PIN_chr5	4115000	4135000	30	3	20000	-1.46294	0.12133	0.655088	Pma_10004668	4129995	4170216	XP_033762187.1/4.4e-66/uncharacterized protein LOC117343795 [Pecten maximus]	sanh:107657348/2.9e-20/WAS/WASL-interacting protein family member 1-like; K19475 WAS/WASL-interacting protein	cellular_component:GO:0016021//integral component of membrane;
PIN_chr2	50240000	50250000	282	1	10000	-1.46346	0.0198935	0.76701	Pma_10021297	50224127	50242671	XP_022329030.1/1.2e-213/serine/threonine-protein phosphatase 2A 56 kDa regulatory subunit delta isoform-like isoform X11 [Crassostrea virginica]	crg:105337161/3.3e-214/serine/threonine-protein phosphatase 2A 56 kDa regulatory subunit gamma isoform; K11584 serine/threonine-protein phosphatase 2A regulatory subunit B'	NA
PIN_chr11	4140000	4150000	24	1	10000	-1.4641	0.0886335	0.666281	Pma_10005861	4143069	4144472	XP_009062462.1/2.2e-60/hypothetical protein LOTGIDRAFT_128397, partial [Lottia gigantea] >ESO86762.1 hypothetical protein LOTGIDRAFT_128397, partial [Lottia gigantea]	NA	molecular_function:GO:0003677//DNA binding;GO:0008270//zinc ion binding;
PIN_chr11	4140000	4150000	24	1	10000	-1.4641	0.0886335	0.666281	Pma_10005862	4125765	4142251	XP_006821108.1/3.2e-144/PREDICTED: uncharacterized protein LOC100374136 [Saccoglossus kowalevskii]	sko:100374136/2.9e-145/uncharacterized LOC100374136; K07936 GTP-binding nuclear protein Ran	biological_process:GO:0006913//nucleocytoplasmic transport;GO:0015031//protein transport;cellular_component:GO:0005634//nucleus;molecular_function:GO:0005525//GTP binding;GO:0003924//GTPase activity;
PIN_chr11	2155000	2165000	13	1	10000	-1.46623	0.0117409	0.745974	Pma_10017658	2134027	2172953	XP_022288926.1/1.8e-33/uncharacterized protein LOC111101011 isoform X1 [Crassostrea virginica]	myi:110458736/1.2e-32/uncharacterized protein LOC110458736 isoform X1; K15168 mediator of RNA polymerase II transcription subunit 25	NA
PIN_chr2	45490000	45505000	256	2	15000	-1.46662	0.0896379	0.777434	Pma_10032077	45494780	45498245	XP_009058215.1/1.2e-45/hypothetical protein LOTGIDRAFT_163450 [Lottia gigantea] >ESO90943.1 hypothetical protein LOTGIDRAFT_163450 [Lottia gigantea]	NA	NA
PIN_chr10	5225000	5235000	30	1	10000	-1.46722	0.0432736	0.70671	Pma_10029741	5212626	5227412	XP_022293298.1/1.3e-137/LOW QUALITY PROTEIN: aminopeptidase N-like [Crassostrea virginica]	crg:105330954/4.1e-134/aminopeptidase N; K11140 aminopeptidase N [EC:3.4.11.2]	NA
PIN_chr3	77150000	77165000	410	2	15000	-1.46882	-0.00126622	0.648399	Pma_10024256	77115491	77195445	XP_019924346.1/0.0e+00/PREDICTED: inositol 1,4,5-trisphosphate receptor type 2 isoform X2 [Crassostrea gigas]	myi:110464789/0.0e+00/inositol 1,4,5-trisphosphate receptor type 1-like; K04958 inositol 1,4,5-triphosphate receptor type 1	NA
PIN_chr4	1460000	1475000	10	2	15000	-1.47001	0.0533283	0.678154	Pma_10006222	1465950	1472816	XP_019925117.1/2.1e-36/PREDICTED: flavin reductase (NADPH) [Crassostrea gigas]	cin:100185152/7.6e-10/flavin reductase (NADPH)-like; K05901 biliverdin reductase / flavin reductase [EC:1.3.1.24 1.5.1.30]	NA
PIN_chr8	20340000	20355000	108	2	15000	-1.47353	0.0628625	0.614304	Pma_10015760	20329190	20359292	XP_022309073.1/1.2e-51/uncharacterized protein LOC111114855 [Crassostrea virginica] >XP_022309074.1 uncharacterized protein LOC111114855 [Crassostrea virginica] >XP_022309075.1 uncharacterized protein LOC111114855 [Crassostrea virginica]	crg:105337856/5.0e-42/uncharacterized protein LOC105337856; K21440 ankyrin repeat domain-containing protein 50	NA
PIN_chr10	5770000	5780000	32	1	10000	-1.47555	0.0163084	0.65061	Pma_10029717	5775337	5788388	XP_022338169.1/3.2e-184/solute carrier family 23 member 1-like [Crassostrea virginica]	crg:105319863/1.3e-180/solute carrier family 23 member 1; K14611 solute carrier family 23 (nucleobase transporter), member 1/2	cellular_component:GO:0016021//integral component of membrane;molecular_function:GO:0022857//transmembrane transporter activity;
PIN_chr10	5770000	5780000	32	1	10000	-1.47555	0.0163084	0.65061	Pma_10029718	5772012	5772968	XP_022319793.1/2.9e-51/proteinase-activated receptor 1-like [Crassostrea virginica]	crg:109618679/1.5e-50/C-C chemokine receptor type 2-like; K04179 C-C chemokine receptor type 4	cellular_component:GO:0016021//integral component of membrane;molecular_function:GO:0004930//G protein-coupled receptor activity;
PIN_chr10	59380000	59395000	294	2	15000	-1.47856	-0.00802169	0.684909	Pma_10030398	59359402	59417692	XP_026114931.1/8.2e-36/oocyte zinc finger protein XlCOF6-like [Carassius auratus]	srx:107728172/6.4e-36/zinc finger protein 721-like; K09228 KRAB domain-containing zinc finger protein	NA
PIN_chr12	44570000	44580000	255	1	10000	-1.47913	0.0422322	0.615186	Pma_10025113	44567544	44595297	XP_011450263.2/1.6e-198/PREDICTED: amyloid beta A4 protein [Crassostrea gigas]	crg:105344242/1.5e-199/amyloid beta A4 protein; K04520 amyloid beta A4 protein	NA
PIN_chr3	66250000	66260000	344	1	10000	-1.48053	0.0284196	0.623385	Pma_10030161	66240034	66256701	XP_022321288.1/6.9e-27/uncharacterized protein LOC111123322 [Crassostrea virginica]	pdam:113666020/2.3e-09/forkhead box protein N4-like isoform X1; K09407 forkhead box protein N	cellular_component:GO:0005634//nucleus;molecular_function:GO:0043565//sequence-specific DNA binding;GO:0003700//DNA-binding transcription factor activity;
PIN_chr1	47605000	47620000	242	2	15000	-1.48063	0.113391	0.635111	Pma_464.136	47614446	47617904	NA	NA	NA
PIN_chr9	2850000	2860000	16	1	10000	-1.48105	0.0105083	0.706453	Pma_10013073	2856493	2857637	XP_022312410.1/2.4e-86/uncharacterized protein LOC111117554 [Crassostrea virginica]	lhu:105679516/9.7e-14/LOW QUALITY PROTEIN: uncharacterized protein LOC105679516; K19930 SRC kinase signaling inhibitor 1	NA
PIN_chr6	2785000	2795000	17	1	10000	-1.48204	0.109377	0.648875	Pma_10014446	2768505	2791146	XP_011452889.1/6.2e-84/PREDICTED: sperm-associated antigen 7 homolog [Crassostrea gigas]	ame:411240/5.5e-43/nucleolar protein 10; K14788 ribosome biogenesis protein ENP2	molecular_function:GO:0003676//nucleic acid binding;
PIN_chr9	97465000	97480000	538	2	15000	-1.48204	0	0.790755	Pma_475.73	97464998	97465648	NA	NA	NA
PIN_chr11	51375000	51385000	278	1	10000	-1.4829	0.0380097	0.658381	Pma_10010808	51378515	51388780	XP_011412428.1/1.3e-155/PREDICTED: coiled-coil domain-containing protein 74B isoform X1 [Crassostrea gigas] >XP_019918440.1 PREDICTED: coiled-coil domain-containing protein 74B isoform X1 [Crassostrea gigas] >XP_019918441.1 PREDICTED: coiled-coil domain-containing protein 74B isoform X1 [Crassostrea gigas]	xtr:100494109/3.6e-12/kmt2d; lysine (K)-specific methyltransferase 2D; K09187 histone-lysine N-methyltransferase MLL2 [EC:2.1.1.43]	NA
PIN_chr13	12115000	12125000	62	1	10000	-1.48502	0.038483	0.627674	Pma_10016624	12107503	12115873	XP_022324483.1/3.2e-99/LOW QUALITY PROTEIN: chitinase-3-like protein 2 [Crassostrea virginica]	myi:110457725/2.5e-99/chitinase-3-like protein 1; K01183 chitinase [EC:3.2.1.14]	biological_process:GO:0005975//carbohydrate metabolic process;cellular_component:GO:0016021//integral component of membrane;molecular_function:GO:0004553//hydrolase activity, hydrolyzing O-glycosyl compounds;GO:0008061//chitin binding;
PIN_chr13	12115000	12125000	62	1	10000	-1.48502	0.038483	0.627674	Pma_10016625	12121237	12121575	NA	NA	NA
PIN_chr6	50495000	50505000	247	1	10000	-1.49584	0.163418	0.847142	Pma_10007529	50498324	50512093	XP_022330459.1/6.0e-100/pre-mRNA-splicing factor CWC22 homolog [Crassostrea virginica]	dvi:Dvir_GJ14740/2.4e-11/uncharacterized protein; K13092 nuclear protein NHN1	NA
PIN_chr4	16630000	16645000	94	2	15000	-1.48624	0.0164706	0.664043	Pma_10017380	16632951	16633910	XP_019922818.1/2.1e-07/PREDICTED: uncharacterized protein LOC105328294 [Crassostrea gigas]	crg:105325987/3.1e-06/uncharacterized protein LOC105325987; K21440 ankyrin repeat domain-containing protein 50	NA
PIN_chr7	30270000	30290000	156	3	20000	-1.48568	0.228379	0.714672	Pma_10007653	30273896	30275415	XP_011452835.1/3.0e-57/PREDICTED: uncharacterized protein LOC105346071 [Crassostrea gigas]	crg:105332707/4.8e-10/organic solute transporter subunit alpha-like; K14360 organic solute transporter subunit alpha	molecular_function:GO:0008270//zinc ion binding;GO:0003676//nucleic acid binding;
PIN_chr4	39980000	39990000	241	1	10000	-1.48925	0.0335218	0.61614	Pma_10010493	39981880	40005974	XP_028366335.1/2.0e-89/peptidyl-prolyl cis-trans isomerase-like 4 isoform X2 [Phyllostomus discolor]	obo:105282883/1.3e-59/peptidyl-prolyl cis-trans isomerase sig-7; K12735 peptidyl-prolyl cis-trans isomerase-like 4 [EC:5.2.1.8]	cellular_component:GO:0005654//nucleoplasm;GO:0005829//cytosol;molecular_function:GO:0003723//RNA binding;GO:0003755//peptidyl-prolyl cis-trans isomerase activity;
PIN_chr9	35705000	35720000	196	2	15000	-1.49171	0.0171507	0.631719	Pma_10014722	35712001	35722837	XP_032080217.1/3.9e-31/dentin sialophosphoprotein [Thamnophis elegans]	tup:102472440/3.7e-16/MUC17; serine-rich adhesin for platelets; K22016 mucin-3/17	NA
PIN_chr14	38810000	38820000	217	1	10000	-1.49171	0.071469	0.794378	Pma_10012319	38810055	38839526	XP_011450953.2/4.3e-25/PREDICTED: peptidyl-prolyl cis-trans isomerase-like 2 [Crassostrea gigas]	crg:105344775/4.0e-26/peptidyl-prolyl cis-trans isomerase-like 2; K10598 peptidyl-prolyl cis-trans isomerase-like 2 [EC:5.2.1.8]	NA
PIN_chr9	54780000	54790000	291	1	10000	-1.49337	0.118062	0.867179	Pma_519.331	54778436	54780727	NA	NA	NA
PIN_chr9	3895000	3905000	21	1	10000	-1.49421	0.00342419	0.607147	Pma_10028388	3865372	3896725	XP_011446604.2/3.0e-47/PREDICTED: uncharacterized protein LOC105341669 [Crassostrea gigas]	NA	cellular_component:GO:0016021//integral component of membrane;molecular_function:GO:0004930//G protein-coupled receptor activity;
PIN_chr2	39615000	39625000	217	1	10000	-1.49443	0.100717	0.798673	Pma_10016941	39616826	39630217	OWF48551.1/6.3e-12/hypothetical protein KP79_PYT19627 [Mizuhopecten yessoensis]	myi:110452905/1.7e-12/uncharacterized protein LOC110452905 isoform X1; K19930 SRC kinase signaling inhibitor 1	NA
PIN_chr3	52575000	52590000	279	2	15000	-1.49443	0.0950797	0.858285	Pma_10021705	52581959	52583488	TWW71483.1/3.7e-28/Cubilin 460 kDa receptor [Takifugu flavidus]	els:105009593/3.0e-17/LOW QUALITY PROTEIN: histone-lysine N-methyltransferase PRDM9; K20796 histone-lysine N-methyltransferase PRDM7/9 [EC:2.1.1.43]	molecular_function:GO:0005509//calcium ion binding;
PIN_chr3	52575000	52590000	279	2	15000	-1.49443	0.0950797	0.858285	Pma_10021706	52585877	52639432	XP_022299223.1/0.0e+00/uncharacterized protein LOC111108026 [Crassostrea virginica] >XP_022299224.1 uncharacterized protein LOC111108026 [Crassostrea virginica]	lak:106163053/2.4e-196/LOW QUALITY PROTEIN: mucin-4; K22017 mucin-4	NA
PIN_chr5	19385000	19400000	116	2	15000	-1.49443	0.0484449	0.896534	Pma_10031625	19392628	19432831	XP_033728882.1/0.0e+00/protein crumbs-like isoform X2 [Pecten maximus]	myi:110448957/0.0e+00/protein crumbs-like isoform X1; K16681 protein crumbs	cellular_component:GO:0016021//integral component of membrane;molecular_function:GO:0005509//calcium ion binding;
PIN_chr4	25880000	25890000	158	1	10000	-1.49502	0.0636364	0.678739	Pma_504.361	25886339	25886887	NA	NA	NA
PIN_chr6	13455000	13470000	70	2	15000	-1.49502	0.0134454	0.694987	Pma_10028178	13468252	13477076	XP_033749452.1/0.0e+00/chondroitin sulfate proteoglycan 4-like [Pecten maximus]	myi:110445649/0.0e+00/chondroitin sulfate proteoglycan 4-like; K08115 chondroitin sulfate proteoglycan 4	cellular_component:GO:0016021//integral component of membrane;
PIN_chr11	6780000	6790000	38	1	10000	-1.49502	0.0338834	0.825658	Pma_10006984	6754585	6787335	XP_019854453.1/1.4e-10/PREDICTED: ankyrin-1-like isoform X3 [Amphimedon queenslandica]	bmy:Bm1_21440/4.9e-11/KH domain containing protein; K16726 ankyrin repeat domain-containing protein 17	molecular_function:GO:0003723//RNA binding;
PIN_chr13	20850000	20860000	100	1	10000	-1.49502	0.0516304	0.809429	Pma_407.339	20844737	20850774	NA	NA	NA
PIN_chr12	20950000	20960000	127	1	10000	-1.49584	0.0176332	0.77251	Pma_10005093	20942396	20966839	XP_033743685.1/8.3e-98/DCN1-like protein 5 [Pecten maximus] >XP_033743686.1 DCN1-like protein 5 [Pecten maximus]	myi:110440356/1.7e-98/DCN1-like protein 5; K17824 DCN1-like protein 4/5	NA
PIN_chr1	48245000	48260000	245	2	15000	-1.49586	0.0395402	0.754828	Pma_10024356	48216268	48271053	OWF53777.1/1.8e-100/dimethyladenosine transferase [Mizuhopecten yessoensis]	myi:110445954/1.7e-101/probable dimethyladenosine transferase; K14191 18S rRNA (adenine1779-N6/adenine1780-N6)-dimethyltransferase [EC:2.1.1.183]	molecular_function:GO:0003723//RNA binding;GO:0000179//rRNA (adenine-N6,N6-)-dimethyltransferase activity;
PIN_chr14	39120000	39135000	218	2	15000	-1.49586	0.0125149	0.755195	Pma_177.252	39119099	39172788	NA	NA	NA
PIN_chr3	69300000	69310000	364	1	10000	-1.49595	0.0953352	0.79376	Pma_10014471	69280694	69309105	XP_011446782.1/1.5e-40/PREDICTED: proto-oncogene c-Fos [Crassostrea gigas]	amex:103029808/3.3e-22/LOW QUALITY PROTEIN: golgin subfamily B member 1-like; K20478 golgin subfamily B member 1	NA
PIN_chr1	13180000	13190000	80	1	10000	-1.49604	0.012891	0.713564	Pma_10014774	13166674	13200457	XP_019930500.1/4.0e-303/PREDICTED: RUN and FYVE domain-containing protein 2-like isoform X2 [Crassostrea gigas]	cjo:107315722/1.3e-179/DNA replication ATP-dependent helicase/nuclease DNA2; K10742 DNA replication ATP-dependent helicase Dna2 [EC:3.6.4.12]	NA
PIN_chr1	59395000	59405000	295	1	10000	-1.49614	-0.017266	0.636055	Pma_10029378	59372831	59414691	XP_022329842.1/0.0e+00/LOW QUALITY PROTEIN: sodium channel protein 1 brain-like [Crassostrea virginica]	crg:105321187/0.0e+00/sodium channel protein 1 brain isoform X6; K21862 voltage-gated cation channel	NA
PIN_chr10	69285000	69295000	344	1	10000	-1.49636	0.0697072	0.696023	Pma_10027348	69283157	69285332	XP_022295009.1/1.1e-67/uncharacterized protein LOC111105128 [Crassostrea virginica]	NA	NA
PIN_chr10	82810000	82820000	417	1	10000	-1.49668	0.0200022	0.710563	Pma_10022698	82813234	82845896	XP_022328103.1/3.2e-36/uncharacterized protein LOC111127294 isoform X1 [Crassostrea virginica]	myi:110457451/1.9e-31/uncharacterized protein LOC110457451 isoform X1; K06238 collagen, type VI, alpha	cellular_component:GO:0005581//collagen trimer;
PIN_chr5	37600000	37610000	225	1	10000	-1.4967	0	0.714809	Pma_10003683	37576862	37612528	XP_022316843.1/5.9e-63/multiple epidermal growth factor-like domains protein 6 [Crassostrea virginica]	myi:110465600/4.2e-48/neurogenic locus Notch protein-like; K02599 Notch 1	NA
PIN_chr11	27695000	27705000	159	1	10000	-1.49904	0.139572	0.625332	Pma_10024283	27674856	27741408	XP_019921769.1/0.0e+00/PREDICTED: probable E3 ubiquitin-protein ligase HECTD4 [Crassostrea gigas]	crg:105325950/0.0e+00/probable E3 ubiquitin-protein ligase HECTD4; K17849 E3 ubiquitin-protein ligase HECTD4 [EC:2.3.2.26]	molecular_function:GO:0004842//ubiquitin-protein transferase activity;
PIN_chr2	44860000	44880000	248	2	20000	-1.49941	0.0391203	0.743223	Pma_93.890	44870463	44871284	NA	NA	NA
PIN_chr2	1925000	1940000	9	2	15000	-1.50142	0.168801	0.775813	Pma_10014656	1920676	1928748	NA	NA	NA
PIN_chr1	92160000	92170000	472	1	10000	-1.50498	0.0251559	0.671709	Pma_10023030	92166969	92207768	XP_033739227.1/2.0e-143/uncharacterized protein LOC117326577 [Pecten maximus]	myi:110461554/2.3e-142/uncharacterized protein LOC110461554; K02603 origin recognition complex subunit 1	NA
PIN_chr11	55340000	55350000	296	1	10000	-1.50566	0.038072	0.758759	Pma_10015420	55348356	55374662	OPJ78443.1/0.0e+00/neurofibromin isoform A [Patagioenas fasciata monilis]	epa:110250663/0.0e+00/neurofibromin-like; K08052 neurofibromin 1	biological_process:GO:0043087//regulation of GTPase activity;GO:0007165//signal transduction;
PIN_chr1	18390000	18400000	112	1	10000	-1.5059	0.100902	0.601742	Pma_10018536	18399218	18401928	XP_022339671.1/3.9e-15/uncharacterized protein LOC111134687 [Crassostrea virginica]	crg:105345847/1.6e-11/E3 ubiquitin-protein ligase TRIM71; K12035 tripartite motif-containing protein 71 [EC:2.3.2.27]	molecular_function:GO:0008270//zinc ion binding;
PIN_chr1	18390000	18400000	112	1	10000	-1.5059	0.100902	0.601742	Pma_10018537	18393596	18396326	XP_019927264.1/4.7e-16/PREDICTED: uncharacterized protein LOC109620084 [Crassostrea gigas]	crg:105345847/1.6e-11/E3 ubiquitin-protein ligase TRIM71; K12035 tripartite motif-containing protein 71 [EC:2.3.2.27]	molecular_function:GO:0008270//zinc ion binding;
PIN_chr12	8315000	8325000	53	1	10000	-1.50965	0.00223442	0.619714	Pma_10015916	8302560	8354551	XP_011445615.1/0.0e+00/PREDICTED: cadherin-related tumor suppressor [Crassostrea gigas]	crg:105341032/0.0e+00/cadherin-related tumor suppressor; K16669 protocadherin Fat 4	biological_process:GO:0007156//homophilic cell adhesion via plasma membrane adhesion molecules;cellular_component:GO:0016021//integral component of membrane;GO:0005886//plasma membrane;molecular_function:GO:0005509//calcium ion binding;
PIN_chr5	21790000	21800000	124	1	10000	-1.50991	0.0349037	0.61023	Pma_10001221	21784627	21792449	KOF95821.1/1.5e-08/hypothetical protein OCBIM_22037117mg [Octopus bimaculoides]	NA	biological_process:GO:0006334//nucleosome assembly;cellular_component:GO:0016021//integral component of membrane;GO:0000786//nucleosome;molecular_function:GO:0003677//DNA binding;
PIN_chr5	21790000	21800000	124	1	10000	-1.50991	0.0349037	0.61023	Pma_10001222	21794330	21813431	XP_033732422.1/6.7e-184/sodium/glucose cotransporter 4-like [Pecten maximus]	myi:110442307/4.1e-184/sodium/glucose cotransporter 4-like isoform X1; K14389 solute carrier family 5 (sodium/glucose cotransporter), member 9	cellular_component:GO:0016021//integral component of membrane;molecular_function:GO:0022857//transmembrane transporter activity;
PIN_chr5	24520000	24530000	141	1	10000	-1.51156	0.0117862	0.7345	Pma_10020202	24522621	24539034	XP_009048437.1/3.3e-167/hypothetical protein LOTGIDRAFT_225638 [Lottia gigantea] >ESP00901.1 hypothetical protein LOTGIDRAFT_225638 [Lottia gigantea]	myi:110460800/4.4e-167/spliceosome RNA helicase DDX39B; K12812 ATP-dependent RNA helicase UAP56/SUB2 [EC:3.6.4.13]	molecular_function:GO:0005524//ATP binding;GO:0004386//helicase activity;GO:0003676//nucleic acid binding;
PIN_chr4	14660000	14675000	80	2	15000	-1.51265	0.0920331	0.761133	Pma_10016838	14664315	14665367	KAE9550587.1/2.7e-18/hypothetical protein FO519_006193 [Halicephalobus sp. NKZ332]	apla:101801519/3.3e-16/CHRNA1; acetylcholine receptor subunit alpha; K04803 nicotinic acetylcholine receptor alpha-1	NA
PIN_chr4	14660000	14675000	80	2	15000	-1.51265	0.0920331	0.761133	Pma_10016839	14672639	14673691	RUS71652.1/6.2e-47/hypothetical protein EGW08_020592, partial [Elysia chlorotica]	myi:110455090/4.1e-46/acetylcholine receptor subunit alpha-like 2; K05312 nicotinic acetylcholine receptor, invertebrate	cellular_component:GO:0016021//integral component of membrane;GO:0045211//postsynaptic membrane;molecular_function:GO:0004888//transmembrane signaling receptor activity;GO:0022848//acetylcholine-gated cation-selective channel activity;
PIN_chr4	17395000	17410000	101	2	15000	-1.51326	0.062019	0.77638	Pma_10015286	17392464	17412886	XP_022343084.1/5.6e-148/tonsoku-like protein isoform X1 [Crassostrea virginica]	crg:105341624/4.4e-148/tonsoku-like protein; K09257 NF-kappa-B inhibitor-like protein 2	NA
PIN_chr1	98165000	98175000	510	1	10000	-1.51337	0.0441479	0.777882	Pma_10001362	98171381	98176803	XP_020624412.1/4.5e-18/uncharacterized threonine-rich GPI-anchored glycoprotein PJ4664.02-like, partial [Orbicella faveolata]	aqu:100632421/8.7e-09/uncharacterized threonine-rich GPI-anchored glycoprotein PJ4664.02-like; K18032 receptor-type tyrosine-protein phosphatase A [EC:3.1.3.48]	NA
PIN_chr3	83510000	83520000	438	1	10000	-1.51356	0.0395135	0.681917	Pma_10001389	83518489	83520633	XP_022298986.1/7.0e-255/putative RNA-binding protein 15B [Crassostrea virginica]	crg:105342534/5.1e-253/putative RNA-binding protein 15B; K13190 RNA-binding protein 15	molecular_function:GO:0003723//RNA binding;
PIN_chr1	47785000	47795000	243	1	10000	-1.51431	0.00839234	0.70302	Pma_10009313	47789434	47791498	XP_027056562.1/5.8e-39/BTB/POZ domain-containing protein 2-like [Pocillopora damicornis] >RMX58287.1 hypothetical protein pdam_00000233 [Pocillopora damicornis]	pdam:113683510/5.4e-40/BTB/POZ domain-containing protein 2-like; K10477 BTB/POZ domain-containing protein 1/2	NA
PIN_chr1	47785000	47795000	243	1	10000	-1.51431	0.00839234	0.70302	Pma_10009314	47783226	47788470	XP_033725019.1/6.7e-65/BTB/POZ domain-containing protein 6-like [Pecten maximus]	myi:110442856/9.0e-65/BTB/POZ domain-containing protein 6-like isoform X1; K10478 BTB/POZ domain-containing protein 3/6	NA
PIN_chr12	16200000	16210000	94	1	10000	-1.51834	0.0982503	0.639958	Pma_10007309	16196055	16209011	XP_021360259.1/1.9e-192/sodium/glucose cotransporter 4-like isoform X3 [Mizuhopecten yessoensis]	crg:105335152/9.8e-192/sodium/glucose cotransporter 5; K14391 solute carrier family 5 (sodium/myo-inositol cotransporter), member 11	cellular_component:GO:0016021//integral component of membrane;molecular_function:GO:0022857//transmembrane transporter activity;
PIN_chr12	18460000	18470000	110	1	10000	-1.51877	0.0494621	0.616961	Pma_10023811	18453820	18473337	XP_022325332.1/3.8e-188/titin-like isoform X3 [Crassostrea virginica]	obi:106873106/1.4e-108/obscurin-like; K12567 titin [EC:2.7.11.1]	NA
PIN_chr4	12720000	12730000	71	1	10000	-1.51994	-0.00466292	0.615397	Pma_10023865	12714756	12725327	NA	NA	NA
PIN_chr6	20490000	20505000	115	2	15000	-1.52258	0.064577	0.653721	Pma_10024166	20503294	20505323	XP_019918693.1/7.9e-20/PREDICTED: uncharacterized protein LOC105318070 [Crassostrea gigas]	NA	NA
PIN_chr6	20490000	20505000	115	2	15000	-1.52258	0.064577	0.653721	Pma_10024167	20491658	20492476	XP_022307395.1/1.2e-98/uncharacterized protein LOC111113421 [Crassostrea virginica]	pxy:105390966/2.9e-39/uncharacterized LOC105390966; K23014 inactive dipeptidyl peptidase 10	NA
PIN_chr6	29435000	29450000	186	2	15000	-1.52496	0.0374513	0.664042	Pma_10030707	29431462	29462864	ANJ60740.1/3.4e-80/chitinase 1 [Pinctada fucata]	crg:105331572/4.6e-72/acidic mammalian chitinase isoform X1; K01183 chitinase [EC:3.2.1.14]	biological_process:GO:0005975//carbohydrate metabolic process;cellular_component:GO:0005576//extracellular region;molecular_function:GO:0004553//hydrolase activity, hydrolyzing O-glycosyl compounds;GO:0008061//chitin binding;
PIN_chr8	24515000	24525000	135	1	10000	-1.52516	0.0503936	0.641606	Pma_10001020	24523198	24523428	XP_011411923.1/2.6e-06/PREDICTED: uncharacterized protein LOC105317089 [Crassostrea gigas]	bfo:BRAFLDRAFT_117517/3.5e-06/hypothetical protein; K22594 pogo transposable element with ZNF domain	NA
PIN_chr7	21110000	21120000	124	1	10000	-1.52659	0.0186356	0.610685	Pma_10006839	21088991	21111848	KAF4024712.1/1.4e-15/hypothetical protein G4228_016724 [Cervus hanglu yarkandensis]	crg:105328831/1.9e-15/uncharacterized protein LOC105328831; K01315 plasminogen [EC:3.4.21.7]	cellular_component:GO:0016021//integral component of membrane;molecular_function:GO:0004252//serine-type endopeptidase activity;GO:0005230//extracellular ligand-gated ion channel activity;
PIN_chr2	14035000	14045000	86	1	10000	-1.52876	0.047217	0.60322	Pma_552.359	14039328	14040488	NA	NA	NA
PIN_chr14	185000	195000	3	1	10000	-1.52903	0.112754	0.648969	Pma_10000562	174270	197073	XP_011413692.1/0.0e+00/PREDICTED: C2 domain-containing protein 3 [Crassostrea gigas]	crg:105318339/0.0e+00/C2 domain-containing protein 3; K16751 C2 domain-containing protein 3	NA
PIN_chr5	48835000	48850000	284	2	15000	-1.52944	0.0963553	0.665084	Pma_10010703	48841768	48842523	OQV25651.1/3.7e-09/hypothetical protein BV898_00586 [Hypsibius dujardini]	NA	cellular_component:GO:0016021//integral component of membrane;molecular_function:GO:0008168//methyltransferase activity;
PIN_chr12	27950000	27965000	155	2	15000	-1.53245	0.053386	0.764212	Pma_10006289	27952163	27954928	XP_021379463.1/9.1e-23/protein ANTAGONIST OF LIKE HETEROCHROMATIN PROTEIN 1-like [Mizuhopecten yessoensis]	NA	NA
PIN_chr9	91220000	91230000	491	1	10000	-1.53332	0.0152347	0.62301	Pma_10027113	91223468	91258216	XP_033739635.1/3.6e-203/excitatory amino acid transporter 2-like [Pecten maximus]	myi:110456874/9.2e-202/excitatory amino acid transporter-like; K05613 solute carrier family 1 (glial high affinity glutamate transporter), member 2	cellular_component:GO:0016021//integral component of membrane;molecular_function:GO:0015293//symporter activity;
PIN_chr9	44080000	44095000	209	2	15000	-1.7233	0.270217	0.453305	Pma_10007831	44072390	44088478	XP_014777613.1/2.9e-78/PREDICTED: mitochondrial glutamate carrier 1-like [Octopus bimaculoides]	obi:106874401/2.7e-79/mitochondrial glutamate carrier 1-like; K15107 solute carrier family 25 (mitochondrial glutamate transporter), member 18/22	cellular_component:GO:0016021//integral component of membrane;molecular_function:GO:0005347//ATP transmembrane transporter activity;
PIN_chr6	14160000	14170000	73	1	10000	-1.53483	0.0927531	0.751038	Pma_10007315	14131099	14171275	XP_011444436.1/2.1e-272/PREDICTED: uncharacterized protein LOC105340196 isoform X1 [Crassostrea gigas] >XP_019927768.1 PREDICTED: uncharacterized protein LOC105340196 isoform X2 [Crassostrea gigas] >XP_019927769.1 PREDICTED: uncharacterized protein LOC105340196 isoform X3 [Crassostrea gigas]	NA	NA
PIN_chr9	49995000	50005000	259	1	10000	-1.53507	0.0525618	0.604176	Pma_10030553	50003720	50005324	XP_029851010.1/1.2e-17/trichohyalin [Ixodes scapularis]	xma:102234248/2.3e-11/cald1; caldesmon; K12327 caldesmon	molecular_function:GO:0016740//transferase activity;
PIN_chr1	54120000	54140000	267	3	20000	-1.53712	0.0260396	0.664256	Pma_10027466	54134902	54149411	SPJ11060.1/1.5e-24/conserved Plasmodium protein, unknown function [Plasmodium sp. DRC-Itaito]	pdam:113681230/1.1e-11/uncharacterized protein LOC113681230; K10955 mucin-2	NA
PIN_chr1	54120000	54140000	267	3	20000	-1.53712	0.0260396	0.664256	Pma_10027467	54113809	54130305	XP_022314886.1/2.4e-245/ATP-binding cassette sub-family G member 2-like isoform X3 [Crassostrea virginica] >XP_022314887.1 ATP-binding cassette sub-family G member 2-like isoform X3 [Crassostrea virginica]	crg:105334117/1.6e-241/ATP-binding cassette sub-family G member 2 isoform X2; K05681 ATP-binding cassette, subfamily G (WHITE), member 2	NA
PIN_chr6	38820000	38830000	254	1	10000	-1.53808	0.12175	0.619178	Pma_10032358	38813573	38832286	XP_019926087.1/7.7e-265/PREDICTED: centrosomal protein of 89 kDa [Crassostrea gigas]	crg:105336123/7.2e-266/centrosomal protein of 89 kDa; K16543 centrosomal protein CEP89	NA
PIN_chr10	63325000	63340000	315	2	15000	-1.53908	0.108057	0.735289	Pma_10009530	63336264	63354105	XP_022809504.1/3.0e-12/uncharacterized protein LOC111346484 [Stylophora pistillata] >XP_022809505.1 uncharacterized protein LOC111346484 [Stylophora pistillata]	spis:111346484/2.8e-13/uncharacterized protein LOC111346484; K12805 NLR family CARD domain-containing protein 4	biological_process:GO:0007165//signal transduction;
PIN_chr3	29345000	29360000	155	2	15000	-1.54071	0.0686237	0.642613	Pma_10009346	29350040	29351491	XP_022336251.1/6.6e-47/uncharacterized protein LOC111132719 [Crassostrea virginica]	crg:105345847/1.8e-36/E3 ubiquitin-protein ligase TRIM71; K12035 tripartite motif-containing protein 71 [EC:2.3.2.27]	NA
PIN_chr1	3670000	3680000	18	1	10000	-1.54085	0.0472986	0.830845	Pma_10007350	3673526	3678109	PVD37651.1/1.3e-33/hypothetical protein C0Q70_00249 [Pomacea canaliculata]	bta:534204/3.7e-20/TEFM; transcription elongation factor, mitochondrial; K17658 transcription elongation factor, mitochondrial	biological_process:GO:0006392//transcription elongation from mitochondrial promoter;cellular_component:GO:0005739//mitochondrion;
PIN_chr5	7945000	7960000	46	2	15000	-1.54366	0.0494204	0.679447	Pma_10021846	7956227	7958431	XP_022327300.1/4.4e-73/potassium voltage-gated channel protein egl-36-like [Crassostrea virginica]	myi:110457818/5.2e-53/potassium voltage-gated channel protein egl-36-like; K04887 potassium voltage-gated channel Shaw-related subfamily C member 1	NA
PIN_chr5	7945000	7960000	46	2	15000	-1.54366	0.0494204	0.679447	Pma_10021847	7944835	7954185	XP_014736176.1/2.9e-14/PREDICTED: C-type lectin domain family 18 member A-like [Sturnus vulgaris]	crg:105318345/3.8e-25/cysteine-rich secretory protein LCCL domain-containing 2 isoform X1; K20412 peptidase inhibitor 16	NA
PIN_chr9	85450000	85460000	459	1	10000	-1.54397	-0.00375718	0.700661	Pma_529.202	85438092	85466392	NA	NA	NA
PIN_chr2	52750000	52765000	294	2	15000	-1.54408	0.0686357	0.64769	Pma_10032471	52763449	52771746	XP_011428122.1/2.4e-142/PREDICTED: uncharacterized protein LOC105328805 [Crassostrea gigas]	mcc:717142/8.9e-07/KYAT1, CCBL1; kynurenine aminotransferase 1; K00816 kynurenine---oxoglutarate transaminase / cysteine-S-conjugate beta-lyase / glutamine---phenylpyruvate transaminase [EC:2.6.1.7 4.4.1.13 2.6.1.64]	biological_process:GO:0009058//biosynthetic process;molecular_function:GO:0008483//transaminase activity;GO:0030170//pyridoxal phosphate binding;
PIN_chr2	52750000	52765000	294	2	15000	-1.54408	0.0686357	0.64769	Pma_10032472	52757562	52759055	XP_022339671.1/4.2e-41/uncharacterized protein LOC111134687 [Crassostrea virginica]	crg:105345847/1.8e-26/E3 ubiquitin-protein ligase TRIM71; K12035 tripartite motif-containing protein 71 [EC:2.3.2.27]	NA
PIN_chr2	52750000	52765000	294	2	15000	-1.54408	0.0686357	0.64769	Pma_10032473	52749076	52750020	XP_022339671.1/1.4e-26/uncharacterized protein LOC111134687 [Crassostrea virginica]	crg:105345847/1.5e-23/E3 ubiquitin-protein ligase TRIM71; K12035 tripartite motif-containing protein 71 [EC:2.3.2.27]	NA
PIN_chr12	47555000	47565000	275	1	10000	-1.54432	0.0381117	0.624135	Pma_10022176	47563249	47574412	XP_011430212.1/8.9e-36/PREDICTED: myosin-9-like [Crassostrea gigas]	crg:105329098/3.5e-27/paramyosin isoform X1; K10352 myosin heavy chain	NA
PIN_chr10	76520000	76530000	390	1	10000	-1.54552	0.121901	0.653835	Pma_10002884	76493319	76537714	XP_033726281.1/4.4e-89/leucine-rich repeat-containing protein 71-like isoform X9 [Pecten maximus]	adf:107328071/5.2e-08/protein NLRC3-like; K22614 NLR family CARD domain-containing protein 3	NA
PIN_chr10	3555000	3565000	16	1	10000	-1.54616	-0.0130774	0.701192	Pma_10008052	3561590	3565306	XP_034343753.1/4.5e-66/LOW QUALITY PROTEIN: basic proline-rich protein-like, partial [Arvicanthis niloticus]	clv:102096629/1.6e-45/FMN2; formin-2 isoform X1; K02184 formin 2	NA
PIN_chr5	3125000	3135000	20	1	10000	-1.54933	0.0229209	0.679689	Pma_382.111	3133209	3147928	NA	NA	NA
PIN_chr9	10780000	10790000	56	1	10000	-1.55024	0.0438065	0.688477	Pma_10020762	10777249	10782573	XP_033750251.1/5.1e-70/arrestin domain-containing protein 3-like [Pecten maximus] >XP_033750252.1 arrestin domain-containing protein 3-like [Pecten maximus]	dpte:113790671/4.5e-21/general transcription factor IIF subunit 1-like; K03138 transcription initiation factor TFIIF subunit alpha	NA
PIN_chr10	41985000	42000000	205	2	15000	-1.55039	0.00874419	0.647382	Pma_10028426	41989180	42010778	XP_022286537.1/2.0e-37/uncharacterized protein LOC111099517 isoform X1 [Crassostrea virginica]	crg:105329600/1.8e-38/uncharacterized protein LOC105329600; K16591 HAUS augmin-like complex subunit 8	NA
PIN_chr4	9055000	9065000	53	1	10000	-1.55292	0.00367002	0.724465	Pma_10031223	9038617	9061588	XP_022296008.1/0.0e+00/leucine-rich repeat and guanylate kinase domain-containing protein-like [Crassostrea virginica]	dpte:113794096/1.6e-34/guanylate kinase-like; K00942 guanylate kinase [EC:2.7.4.8]	molecular_function:GO:0016301//kinase activity;
PIN_chr2	46285000	46295000	258	1	10000	-1.55476	0.281507	0.603674	Pma_262.361	46280751	46286959	NA	NA	NA
PIN_chr2	49070000	49080000	276	1	10000	-1.55594	0.0137494	0.641334	Pma_10024233	49078879	49108431	XP_009059221.1/0.0e+00/hypothetical protein LOTGIDRAFT_164458 [Lottia gigantea] >ESO90147.1 hypothetical protein LOTGIDRAFT_164458 [Lottia gigantea]	sanh:107653532/4.2e-34/aldehyde oxidase 1-like; K00157 aldehyde oxidase [EC:1.2.3.1]	NA
PIN_chr3	35165000	35175000	185	1	10000	-1.55675	0.0384889	0.816042	Pma_58.693	35170270	35170878	NA	NA	NA
PIN_chr13	9660000	9670000	46	1	10000	-1.55775	0.0383915	0.677799	Pma_10003516	9635449	9663186	XP_011429584.1/8.4e-163/PREDICTED: beclin-1 [Crassostrea gigas]	crg:105329824/7.8e-164/beclin-1; K08334 beclin	biological_process:GO:0006897//endocytosis;GO:0006914//autophagy;GO:0032465//regulation of cytokinesis;
PIN_chr1	43790000	43800000	222	1	10000	-1.56065	0.0229634	0.634926	Pma_10026114	43780855	43799808	XP_022316436.1/2.1e-112/arf-GAP with dual PH domain-containing protein 1-like isoform X2 [Crassostrea virginica] >XP_022317371.1 arf-GAP with dual PH domain-containing protein 1-like isoform X2 [Crassostrea virginica]	otw:112253041/2.5e-20/stromal membrane-associated protein 1-like; K12486 stromal membrane-associated protein	molecular_function:GO:0046872//metal ion binding;GO:1902936//phosphatidylinositol bisphosphate binding;GO:0005096//GTPase activator activity;
PIN_chr9	46740000	46750000	241	1	10000	-1.56135	0.0195776	0.737193	Pma_10002587	46740834	46775439	XP_009055926.1/5.2e-77/hypothetical protein LOTGIDRAFT_161773 [Lottia gigantea] >ESO93222.1 hypothetical protein LOTGIDRAFT_161773 [Lottia gigantea]	dya:Dyak_GE21640/5.0e-75/Dyak_Hn; Hn; K00500 phenylalanine-4-hydroxylase [EC:1.14.16.1]	biological_process:GO:0006559//L-phenylalanine catabolic process;molecular_function:GO:0004505//phenylalanine 4-monooxygenase activity;GO:0005506//iron ion binding;
PIN_chr11	23510000	23520000	133	1	10000	-1.5625	0.0854472	0.780168	Pma_10028970	23497687	23513829	XP_022316022.1/0.0e+00/LOW QUALITY PROTEIN: DNA-dependent protein kinase catalytic subunit-like [Crassostrea virginica]	myi:110461426/0.0e+00/DNA-dependent protein kinase catalytic subunit-like; K06642 DNA-dependent protein kinase catalytic subunit [EC:2.7.11.1]	NA
PIN_chr11	43065000	43075000	234	1	10000	-1.56783	0.0595648	0.648194	Pma_10015496	43039673	43069837	XP_011433633.1/1.6e-40/PREDICTED: zinc transporter ZIP4 [Crassostrea gigas]	crg:105332660/1.5e-41/zinc transporter ZIP4; K14718 solute carrier family 39 (zinc transporter), member 12	cellular_component:GO:0016021//integral component of membrane;molecular_function:GO:0046873//metal ion transmembrane transporter activity;
PIN_chr3	15665000	15680000	82	2	15000	-1.56819	0.0406304	0.683057	Pma_10024139	15670338	15685341	XP_011435547.1/2.7e-157/PREDICTED: nucleosome assembly protein 1-like 1 isoform X5 [Crassostrea gigas]	crg:105333989/2.5e-158/nucleosome assembly protein 1-like 1 isoform X1; K11279 nucleosome assembly protein 1-like 1	NA
PIN_chr3	51945000	51955000	276	1	10000	-1.56835	0.1296	0.755428	Pma_10017959	51937202	51947306	XP_022297104.1/1.5e-158/G patch domain and KOW motifs-containing protein-like [Crassostrea virginica]	crg:105342341/3.0e-159/G patch domain and KOW motifs-containing protein-like isoform X1; K13101 G patch domain and KOW motifs-containing protein	NA
PIN_chr3	48545000	48555000	258	1	10000	-1.56837	0.0318744	0.698273	Pma_10016154	48540297	48564195	NA	NA	NA
PIN_chr5	30335000	30350000	185	2	15000	-1.56867	0.100242	0.753694	Pma_10009531	30329354	30348407	EAT48490.1/3.6e-11/AAEL000508-PA [Aedes aegypti]	adf:107346367/1.9e-07/uncharacterized LOC107346367; K06252 tenascin	NA
PIN_chr3	76010000	76020000	403	1	10000	-1.57032	0.0632291	0.603266	Pma_10002869	75990865	76014839	XP_011454198.1/5.7e-192/PREDICTED: carboxy-terminal kinesin 2-like [Crassostrea gigas]	crg:105347029/5.3e-193/carboxy-terminal kinesin 2-like; K10405 kinesin family member C1	biological_process:GO:0007018//microtubule-based movement;cellular_component:GO:0005874//microtubule;molecular_function:GO:0005524//ATP binding;GO:0003777//microtubule motor activity;GO:0008017//microtubule binding;
PIN_chr7	10805000	10815000	67	1	10000	-1.57082	0.0495887	0.716717	Pma_10028156	10803211	10805610	XP_033754356.1/1.4e-54/uncharacterized protein LOC117337470 [Pecten maximus]	NA	NA
PIN_chr11	43375000	43385000	237	1	10000	-1.5713	0.0825234	0.812081	Pma_424.232	43373205	43390031	NA	NA	NA
PIN_chr2	35805000	35820000	196	2	15000	-1.57214	0.109919	0.727472	Pma_10015876	35814615	35820887	XP_026299468.1/1.0e-07/mucin-17-like [Apis mellifera]	els:105027998/3.6e-08/transforming acidic coiled-coil-containing protein 2 isoform X1; K14282 transforming acidic coiled-coil-containing protein 2	NA
PIN_chr3	105000	120000	2	2	15000	-1.57295	0.0439776	0.765102	Pma_10026892	96115	113744	XP_022314330.1/5.2e-134/myoneurin-like isoform X8 [Crassostrea virginica]	myi:110459952/5.0e-100/uncharacterized protein LOC110459952 isoform X1; K21754 BTB/POZ domain-containing protein KCTD1/15	NA
PIN_chr5	36515000	36530000	214	2	15000	-1.57489	0.0347213	0.897627	Pma_10025955	36516878	36518371	XP_021362919.1/7.5e-17/uncharacterized protein LOC110456466 [Mizuhopecten yessoensis] >OWF45873.1 hypothetical protein KP79_PYT07270 [Mizuhopecten yessoensis]	NA	cellular_component:GO:0016021//integral component of membrane;
PIN_chr9	4300000	4315000	26	2	15000	-1.57579	0.0459298	0.672419	Pma_10028400	4294971	4308542	XP_011451753.1/0.0e+00/PREDICTED: staphylococcal nuclease domain-containing protein 1-like [Crassostrea gigas]	crg:105345331/0.0e+00/staphylococcal nuclease domain-containing protein 1-like; K15979 staphylococcal nuclease domain-containing protein 1	biological_process:GO:0031047//gene silencing by RNA;cellular_component:GO:0016442//RISC complex;GO:0005737//cytoplasm;molecular_function:GO:0004521//endoribonuclease activity;
PIN_chr6	16810000	16820000	89	1	10000	-1.57684	-0.0309217	0.707236	Pma_10021371	16782803	16837610	XP_022079681.1/9.0e-17/protein NLRC5-like [Acanthaster planci]	spis:111346484/1.3e-13/uncharacterized protein LOC111346484; K12805 NLR family CARD domain-containing protein 4	biological_process:GO:0042981//regulation of apoptotic process;
PIN_chr12	17555000	17565000	105	1	10000	-1.57703	0.0366563	0.654888	Pma_10005638	17563972	17566648	XP_022324925.1/3.0e-90/uncharacterized protein LOC111125429 isoform X1 [Crassostrea virginica] >XP_022324926.1 uncharacterized protein LOC111125429 isoform X1 [Crassostrea virginica] >XP_022324927.1 uncharacterized protein LOC111125429 isoform X1 [Crassostrea virginica] >XP_022324928.1 uncharacterized protein LOC111125429 isoform X1 [Crassostrea virginica]	NA	NA
PIN_chr10	54025000	54035000	269	1	10000	-1.57775	0.042571	0.673262	Pma_10002264	54033279	54048695	XP_022340853.1/9.0e-204/Na(+)/H(+) exchanger beta-like [Crassostrea virginica] >XP_022340854.1 Na(+)/H(+) exchanger beta-like [Crassostrea virginica] >XP_022340855.1 Na(+)/H(+) exchanger beta-like [Crassostrea virginica] >XP_022340856.1 Na(+)/H(+) exchanger beta-like [Crassostrea virginica] >XP_022340857.1 Na(+)/H(+) exchanger beta-like [Crassostrea virginica] >XP_022340859.1 Na(+)/H(+) exchanger…	crg:105349034/7.0e-143/Na(+)/H(+) exchanger beta-like; K12040 solute carrier family 9 (sodium/hydrogen exchanger), member 3	NA
PIN_chr6	35850000	35865000	229	2	15000	-1.58259	0.0806147	0.721989	Pma_10030344	35842910	35858534	XP_022287932.1/4.4e-47/uncharacterized protein LOC111100402 [Crassostrea virginica] >XP_022287934.1 uncharacterized protein LOC111100402 [Crassostrea virginica] >XP_022287935.1 uncharacterized protein LOC111100402 [Crassostrea virginica]	crg:105337800/5.7e-42/uncharacterized protein LOC105337800; K16060 baculoviral IAP repeat-containing protein 2/3	NA
PIN_chr6	35850000	35865000	229	2	15000	-1.58259	0.0806147	0.721989	Pma_10030345	35859520	35911184	XP_022332578.1/0.0e+00/uncharacterized protein LOC111129975 isoform X29 [Crassostrea virginica]	myb:102243447/5.1e-18/DRD5; dopamine receptor D5; K05840 dopamine receptor D5	NA
PIN_chr3	81195000	81205000	426	1	10000	-1.58288	0.111015	0.678666	Pma_10016010	81197288	81214014	XP_011446556.1/3.0e-106/PREDICTED: GTP-binding protein RAD [Crassostrea gigas]	myi:110459869/1.1e-103/uncharacterized protein LOC110459869; K07847 Rad and Gem related GTP binding protein 1	biological_process:GO:0007165//signal transduction;cellular_component:GO:0016020//membrane;molecular_function:GO:0005525//GTP binding;GO:0003924//GTPase activity;
PIN_chr10	85725000	85735000	430	1	10000	-1.58938	0.000121341	0.649373	Pma_10002712	85727147	85736152	XP_014662274.1/7.4e-26/PREDICTED: uncharacterized protein LOC106805259 isoform X1 [Priapulus caudatus]	myi:110465899/1.4e-11/neuroligin-4, X-linked-like isoform X1; K07378 neuroligin	NA
PIN_chr10	75260000	75275000	375	2	15000	-1.47582	0.279127	0.880129	Pma_10008884	75261306	75263747	XP_022290312.1/1.5e-115/uncharacterized protein LOC111101951 [Crassostrea virginica]	amex:103047751/4.0e-52/LOW QUALITY PROTEIN: ryanodine receptor 1; K04961 ryanodine receptor 1	biological_process:GO:0015074//DNA integration;GO:0006310//DNA recombination;molecular_function:GO:0003677//DNA binding;
PIN_chr9	34480000	34490000	188	1	10000	-1.59228	0.0514721	0.611267	Pma_10028621	34482852	34493826	XP_022342585.1/9.2e-27/uncharacterized protein LOC111136203 [Crassostrea virginica]	NA	cellular_component:GO:0005639//integral component of nuclear inner membrane;
PIN_chr11	5000000	5015000	28	2	15000	-1.59347	0.0510589	0.708473	Pma_10017360	4999117	5000796	XP_021367324.1/3.4e-39/uncharacterized protein LOC110459415 [Mizuhopecten yessoensis]	crg:109617037/1.2e-34/uncharacterized protein LOC109617037; K12035 tripartite motif-containing protein 71 [EC:2.3.2.27]	molecular_function:GO:0008270//zinc ion binding;
PIN_chr13	11125000	11135000	58	1	10000	-1.59349	0.114035	0.619778	Pma_10013606	11121355	11154206	XP_022328459.1/0.0e+00/N-acetylneuraminate 9-O-acetyltransferase-like isoform X2 [Crassostrea virginica]	crg:105319248/0.0e+00/CAS1 domain-containing protein 1 isoform X1; K03377 N-acetylneuraminate 9-O-acetyltransferase [EC:2.3.1.45]	cellular_component:GO:0016021//integral component of membrane;
PIN_chr9	70990000	71000000	367	1	10000	-1.59805	0.102494	0.759108	Pma_10016867	70995260	71019898	OWF45857.1/2.6e-126/Betaine--homocysteine S-methyltransferase 1 [Mizuhopecten yessoensis]	crg:105329125/6.9e-98/S-methylmethionine--homocysteine S-methyltransferase BHMT2; K00544 betaine-homocysteine S-methyltransferase [EC:2.1.1.5]	biological_process:GO:0032259//methylation;GO:0009086//methionine biosynthetic process;molecular_function:GO:0008270//zinc ion binding;GO:0047150//betaine-homocysteine S-methyltransferase activity;
PIN_chr6	20280000	20290000	114	1	10000	-1.60061	0.0136893	0.66403	Pma_10008669	20274173	20291251	XP_019925385.1/2.3e-207/PREDICTED: alpha-L-iduronidase isoform X2 [Crassostrea gigas]	lak:106158068/1.4e-167/alpha-L-iduronidase; K01217 L-iduronidase [EC:3.2.1.76]	biological_process:GO:0005975//carbohydrate metabolic process;molecular_function:GO:0004553//hydrolase activity, hydrolyzing O-glycosyl compounds;
PIN_chr1	22590000	22610000	131	3	20000	-1.60117	-0.221767	0.782401	Pma_10022840	22609700	22624366	XP_022286591.1/1.2e-110/choline/ethanolamine kinase-like isoform X2 [Crassostrea virginica]	crg:105319528/8.1e-107/choline/ethanolamine kinase; K14156 choline/ethanolamine kinase [EC:2.7.1.32 2.7.1.82]	molecular_function:GO:0016301//kinase activity;
PIN_chr1	22590000	22610000	131	3	20000	-1.60117	-0.221767	0.782401	Pma_10022841	22584598	22600960	XP_011433226.1/8.0e-148/PREDICTED: prolactin regulatory element-binding protein [Crassostrea gigas]	crg:105332358/7.5e-149/prolactin regulatory element-binding protein; K14003 prolactin regulatory element-binding protein	cellular_component:GO:0016021//integral component of membrane;
PIN_chr2	18860000	18870000	102	1	10000	-1.68929	0.162124	0.872407	Pma_10009133	18829621	18892158	XP_011435451.1/7.5e-262/PREDICTED: protein sprint isoform X1 [Crassostrea gigas] >XP_011435452.1 PREDICTED: protein sprint isoform X1 [Crassostrea gigas] >XP_011435453.1 PREDICTED: protein sprint isoform X1 [Crassostrea gigas]	xtr:100495483/7.0e-37/rin1; Ras and Rab interactor 1; K17638 Ras and Rab interactor 1	NA
PIN_chr12	14840000	14850000	83	1	10000	-1.6072	0.09775	0.703832	Pma_10017668	14849692	14897730	XP_011427378.1/0.0e+00/PREDICTED: protein WWC2 isoform X2 [Crassostrea gigas]	crg:105328283/0.0e+00/protein WWC2 isoform X1; K16685 protein KIBRA	NA
PIN_chr10	62685000	62695000	311	1	10000	-1.60807	0.0300297	0.618683	Pma_10015682	62664840	62687285	XP_022286673.1/2.1e-161/transcriptional coactivator YAP1-like isoform X5 [Crassostrea virginica]	crg:105332932/6.2e-156/transcriptional coactivator YAP1-A isoform X1; K16687 transcriptional coactivator YAP1	NA
PIN_chr11	9040000	9050000	51	1	10000	-1.61013	0.0429431	0.609377	Pma_10024195	9049032	9049880	XP_022335721.1/5.8e-112/uncharacterized protein LOC111132225 [Crassostrea virginica]	pxy:105390966/1.9e-41/uncharacterized LOC105390966; K23014 inactive dipeptidyl peptidase 10	NA
PIN_chr1	90610000	90630000	421	3	20000	-1.53477	0.399752	0.807459	Pma_10010159	90607117	90655196	XP_022316562.1/0.0e+00/coiled-coil and C2 domain-containing protein 2A-like isoform X4 [Crassostrea virginica]	crg:105327578/0.0e+00/coiled-coil and C2 domain-containing protein 2A isoform X1; K19352 coiled-coil and C2 domain-containing protein 2A	NA
PIN_chr1	34445000	34455000	181	1	10000	-1.61394	0.0227425	0.668927	Pma_10012021	34446252	34446512	NA	NA	NA
PIN_chr2	6080000	6090000	35	1	10000	-1.61851	0.0385167	0.625708	Pma_10023362	6077963	6080349	XP_014769632.1/2.5e-08/PREDICTED: uncharacterized protein LOC106868747 [Octopus bimaculoides] >KOF92357.1 hypothetical protein OCBIM_22006809mg [Octopus bimaculoides]	obi:106868747/2.4e-09/uncharacterized LOC106868747; K04599 G protein-coupled receptor Mth (Methuselah protein)	biological_process:GO:0007166//cell surface receptor signaling pathway;cellular_component:GO:0016021//integral component of membrane;molecular_function:GO:0004930//G protein-coupled receptor activity;
PIN_chr9	6460000	6470000	34	1	10000	-1.61951	0.119334	0.608769	Pma_10027954	6458158	6469869	XP_022333283.1/3.7e-37/uncharacterized protein LOC111130474 [Crassostrea virginica]	NA	cellular_component:GO:0016021//integral component of membrane;
PIN_chr7	7180000	7195000	49	2	15000	-1.62288	0.0528378	0.692818	Pma_10011989	7194548	7196887	XP_021369772.1/2.9e-159/fascin-like [Mizuhopecten yessoensis] >OWF42575.1 Fascin [Mizuhopecten yessoensis]	myi:110460890/2.7e-160/fascin-like; K17455 fascin 1/2	biological_process:GO:0016477//cell migration;GO:0007015//actin filament organization;cellular_component:GO:0005856//cytoskeleton;GO:0005737//cytoplasm;molecular_function:GO:0051015//actin filament binding;GO:0030674//protein-macromolecule adaptor activity;
PIN_chr14	19325000	19335000	114	1	10000	-1.6236	0.0563021	0.629691	Pma_10021987	19309523	19332681	XP_033742687.1/9.3e-119/protein mono-ADP-ribosyltransferase PARP14-like [Pecten maximus]	crg:105327967/2.2e-115/poly [ADP-ribose] polymerase 15; K15261 poly [ADP-ribose] polymerase 10/14/15 [EC:2.4.2.30]	NA
PIN_chr12	20515000	20525000	125	1	10000	-1.62434	0.0790472	0.624848	Pma_10002877	20511066	20524869	XP_011429628.1/1.9e-103/PREDICTED: glyoxylate/succinic semialdehyde reductase 1-like isoform X2 [Crassostrea gigas]	spu:105438665/1.7e-51/glyoxylate/succinic semialdehyde reductase 1-like; K18121 glyoxylate/succinic semialdehyde reductase [EC:1.1.1.79 1.1.1.-]	NA
PIN_chr6	21865000	21880000	122	2	15000	-1.62543	0.0160454	0.701441	Pma_10027630	21875621	21889879	XP_022298538.1/1.6e-52/uncharacterized protein LOC111107568 [Crassostrea virginica]	lak:106175385/4.0e-27/uncharacterized protein LOC106175385; K17495 CUB and sushi domain-containing protein	NA
PIN_chr2	33665000	33685000	186	3	20000	-1.62571	0.0686239	0.665442	Pma_10009383	33657356	33667080	XP_003384211.1/2.9e-08/PREDICTED: dnaJ homolog subfamily C member 30-like [Amphimedon queenslandica]	aqu:100635726/2.7e-09/dnaJ homolog subfamily C member 30-like; K19374 DnaJ homolog subfamily C member 30	cellular_component:GO:0016021//integral component of membrane;
PIN_chr13	9685000	9705000	47	3	20000	-1.62639	0.0584939	0.725986	Pma_10000901	9698757	9699321	XP_011432456.1/1.5e-17/PREDICTED: mucin-5AC isoform X3 [Crassostrea gigas]	obi:106875418/5.9e-14/collagen alpha-1(XII) chain-like; K06238 collagen, type VI, alpha	NA
PIN_chr2	28575000	28585000	157	1	10000	-1.62749	0.122067	0.779986	Pma_10014064	28574087	28585103	XP_033725019.1/7.4e-69/BTB/POZ domain-containing protein 6-like [Pecten maximus]	myi:110442856/6.1e-58/BTB/POZ domain-containing protein 6-like isoform X1; K10478 BTB/POZ domain-containing protein 3/6	NA
PIN_chr5	22330000	22340000	127	1	10000	-1.62983	0.0634423	0.668502	Pma_10012406	22325447	22332119	XP_033742526.1/1.9e-27/uncharacterized protein LOC117328983 [Pecten maximus]	adf:107346299/1.4e-25/NEDD8-conjugating enzyme UBC12-like; K10579 ubiquitin-conjugating enzyme E2 M	NA
PIN_chr7	13335000	13355000	83	3	20000	-1.63003	0.0851288	0.679183	Pma_10019937	13325817	13335372	XP_033747681.1/2.9e-154/LOW QUALITY PROTEIN: 2-oxoglutarate dehydrogenase, mitochondrial-like [Pecten maximus]	myi:110448582/4.6e-155/2-oxoglutarate dehydrogenase, mitochondrial-like isoform X1; K00164 2-oxoglutarate dehydrogenase E1 component [EC:1.2.4.2]	biological_process:GO:0006099//tricarboxylic acid cycle;molecular_function:GO:0004591//oxoglutarate dehydrogenase (succinyl-transferring) activity;GO:0030976//thiamine pyrophosphate binding;
PIN_chr7	13335000	13355000	83	3	20000	-1.63003	0.0851288	0.679183	Pma_10019938	13346602	13347546	AKJ32472.1/1.5e-177/axin [Pinctada fucata]	crg:105334024/2.9e-107/axin-1-like; K02157 axin 1	biological_process:GO:0016055//Wnt signaling pathway;
PIN_chr9	26955000	26965000	144	1	10000	-1.6392	0.0933679	0.739931	Pma_10029363	26964845	26975544	XP_022308459.1/1.8e-32/vasoactive intestinal polypeptide receptor 1-like isoform X2 [Crassostrea virginica]	myi:110465120/1.0e-30/vasoactive intestinal polypeptide receptor 1-like isoform X1; K04585 parathyroid hormone receptor 1	NA
PIN_chr9	26955000	26965000	144	1	10000	-1.6392	0.0933679	0.739931	Pma_22.162	26964021	27037983	NA	NA	NA
PIN_chr9	47340000	47350000	248	1	10000	-1.63966	0.0355388	0.730621	Pma_262.147	47338788	47365415	NA	NA	NA
PIN_chr12	39970000	39980000	180	1	10000	-1.38028	0.200094	0.706856	Pma_10010402	39959574	39976395	XP_022327139.1/2.3e-282/LOW QUALITY PROTEIN: sodium- and chloride-dependent taurine transporter-like [Crassostrea virginica]	obi:106876957/9.6e-244/sodium- and chloride-dependent taurine transporter-like; K05041 solute carrier family 6 (neurotransmitter transporter, creatine) member 8	cellular_component:GO:0016021//integral component of membrane;molecular_function:GO:0005328//neurotransmitter:sodium symporter activity;
PIN_chr2	18740000	18750000	110	1	10000	-1.64483	0.0444689	0.628986	Pma_10009136	18741445	18779236	XP_022329134.1/1.2e-282/N-acetylgalactosaminyltransferase 7-like [Crassostrea virginica]	myi:110449325/8.7e-273/N-acetylgalactosaminyltransferase 7-like isoform X1; K00710 polypeptide N-acetylgalactosaminyltransferase [EC:2.4.1.41]	biological_process:GO:0006486//protein glycosylation;cellular_component:GO:0016021//integral component of membrane;GO:0000139//Golgi membrane;molecular_function:GO:0030246//carbohydrate binding;GO:0016757//transferase activity, transferring glycosyl groups;
PIN_chr3	22110000	22125000	109	2	15000	-1.64747	0.0476771	0.666044	Pma_10026560	22115867	22117117	XP_033102421.1/6.9e-69/uncharacterized protein LOC117105404 [Anneissia japonica]	NA	NA
PIN_chr2	8520000	8530000	47	1	10000	-1.64848	0.0617351	0.722641	Pma_10011142	8528652	8536300	XP_033733754.1/1.2e-107/spectrin beta chain-like isoform X2 [Pecten maximus]	myi:110455938/1.1e-108/spectrin beta chain-like isoform X1; K06115 spectrin beta	biological_process:GO:0051693//actin filament capping;cellular_component:GO:0008091//spectrin;molecular_function:GO:0003779//actin binding;GO:0005200//structural constituent of cytoskeleton;
PIN_chr10	75740000	75755000	383	2	15000	-1.65606	0.0487943	0.75379	Pma_10009010	75754704	75760991	XP_021347944.1/1.2e-08/uncharacterized protein LOC110446925 [Mizuhopecten yessoensis] >OWF53041.1 hypothetical protein KP79_PYT08143 [Mizuhopecten yessoensis]	NA	NA
PIN_chr9	6960000	6975000	37	2	15000	-1.6577	0.143794	0.855424	Pma_10027936	6972684	6972911	XP_022294557.1/1.3e-18/uncharacterized protein LOC111104745 [Crassostrea virginica]	NA	NA
PIN_chr9	6960000	6975000	37	2	15000	-1.6577	0.143794	0.855424	Pma_10027937	6959580	6966875	XP_021365905.1/1.1e-59/uncharacterized protein LOC110458502 isoform X1 [Mizuhopecten yessoensis] >OWF44360.1 Ankyrin repeat protein [Mizuhopecten yessoensis]	myi:110452303/7.2e-49/uncharacterized protein LOC110452303; K21440 ankyrin repeat domain-containing protein 50	NA
PIN_chr3	30895000	30905000	165	1	10000	-1.65887	0.0221119	0.63166	Pma_67.16	30901990	30904893	NA	NA	NA
PIN_chr11	33415000	33425000	190	1	10000	-1.65924	0.0870158	0.761082	Pma_10017988	33406202	33429873	XP_033717645.1/1.6e-168/mucin-6 [Tursiops truncatus]	oor:101275949/2.9e-128/MUC6; mucin-6; K22023 mucin-6	NA
PIN_chr2	27340000	27350000	149	1	10000	-1.66031	0.0223134	0.612935	Pma_10004740	27347508	27351627	RZF40283.1/1.3e-248/hypothetical protein LSTR_LSTR014052 [Laodelphax striatellus]	myi:110462423/1.5e-125/mucin-2-like; K10955 mucin-2	cellular_component:GO:0016021//integral component of membrane;molecular_function:GO:0022857//transmembrane transporter activity;
PIN_chr2	27340000	27350000	149	1	10000	-1.66031	0.0223134	0.612935	Pma_254.238	27341412	27342992	NA	NA	NA
PIN_chr10	44495000	44505000	224	1	10000	-1.66285	0.0684068	0.690708	Pma_10012758	44488198	44507473	XP_031808493.1/1.9e-50/transmembrane protein 260 isoform X2 [Sarcophilus harrisii]	NA	cellular_component:GO:0016021//integral component of membrane;
PIN_chr8	11185000	11195000	64	1	10000	-1.66417	0.0561709	0.713172	Pma_10028748	11175794	11199015	XP_022326474.1/5.3e-208/sodium- and chloride-dependent glycine transporter 2-like [Crassostrea virginica] >XP_022326475.1 sodium- and chloride-dependent glycine transporter 2-like [Crassostrea virginica] >XP_022326476.1 sodium- and chloride-dependent glycine transporter 2-like [Crassostrea virginica]	myi:110465670/4.4e-189/sodium- and chloride-dependent glycine transporter 1-like isoform X1; K05038 solute carrier family 6 (neurotransmitter transporter, glycine) member 5/9	cellular_component:GO:0016021//integral component of membrane;molecular_function:GO:0005328//neurotransmitter:sodium symporter activity;
PIN_chr1	76810000	76830000	382	3	20000	-1.67077	0.0416225	0.736411	Pma_10014415	76820428	76850450	XP_009011833.1/3.2e-52/hypothetical protein HELRODRAFT_109396 [Helobdella robusta] >ESO10019.1 hypothetical protein HELRODRAFT_109396 [Helobdella robusta]	sko:100373791/7.6e-49/pentatricopeptide repeat-containing protein 1, mitochondrial-like; K17710 pentatricopeptide repeat domain-containing protein 1	biological_process:GO:0042780//tRNA 3'-end processing;cellular_component:GO:0005759//mitochondrial matrix;molecular_function:GO:0000049//tRNA binding;
PIN_chr9	18340000	18350000	94	1	10000	-1.6731	0.0779094	0.73848	Pma_10028052	18339113	18340111	XP_033729708.1/7.8e-100/uncharacterized protein LOC117318890 [Pecten maximus]	NA	NA
PIN_chr9	18340000	18350000	94	1	10000	-1.6731	0.0779094	0.73848	Pma_10028053	18340235	18340741	XP_022305400.1/1.3e-37/uncharacterized protein LOC111112275 [Crassostrea virginica]	NA	NA
PIN_chr9	81030000	81040000	427	1	10000	-1.6731	0.021415	0.896222	Pma_48.384	81032945	81033907	NA	NA	NA
PIN_chr5	47180000	47190000	274	1	10000	-1.67348	0.133782	0.717245	Pma_10019744	47176334	47200883	XP_022325543.1/2.0e-68/uncharacterized protein LOC111125752 [Crassostrea virginica] >XP_022325544.1 uncharacterized protein LOC111125752 [Crassostrea virginica] >XP_022325545.1 uncharacterized protein LOC111125752 [Crassostrea virginica]	cmy:102935154/8.4e-25/uncharacterized LOC102935154; K17808 mitochondrial protein import protein ZIM17	NA
PIN_chr12	11480000	11490000	69	1	10000	-1.67664	0.0528005	0.606558	Pma_10013235	11424227	11480878	XP_022322034.1/5.1e-81/LOW QUALITY PROTEIN: AF4/FMR2 family member 4-like [Crassostrea virginica]	myi:110457228/1.7e-63/AF4/FMR2 family member 4-like isoform X1; K15195 AF4/FMR2 family member 3	NA
PIN_chr12	11480000	11490000	69	1	10000	-1.67664	0.0528005	0.606558	Pma_10013236	11482873	11487075	XP_033742230.1/1.8e-126/sequestosome-1-like [Pecten maximus]	myi:110457617/8.9e-121/sequestosome-1-like; K14381 sequestosome 1	molecular_function:GO:0008270//zinc ion binding;
PIN_chr12	11480000	11490000	69	1	10000	-1.67664	0.0528005	0.606558	Pma_10013237	11487256	11494956	RXM27209.1/4.9e-22/Transcription factor IIIB 50 kDa subunit [Acipenser ruthenus]	NA	cellular_component:GO:0016021//integral component of membrane;
PIN_chr7	26960000	26970000	158	1	10000	-1.67847	0.0597994	0.722923	Pma_119.131	26958050	26983474	NA	NA	NA
PIN_chr1	15300000	15310000	91	1	10000	-1.67927	0.0537407	0.615594	Pma_10014976	15306637	15325013	XP_021367387.1/0.0e+00/radial spoke head 10 homolog B-like [Mizuhopecten yessoensis] >OWF43641.1 Radial spoke head 10-like B2 [Mizuhopecten yessoensis]	acun:113478905/1.1e-28/RSPH1; radial spoke head 1 homolog; K19755 radial spoke head protein 1	NA
PIN_chr1	15300000	15310000	91	1	10000	-1.67927	0.0537407	0.615594	Pma_10014977	15298114	15300253	XP_022327124.1/1.1e-93/serine/threonine-protein phosphatase 6 catalytic subunit [Crassostrea virginica] >XP_022327376.1 serine/threonine-protein phosphatase 6 catalytic subunit [Crassostrea virginica]	crg:105332168/1.0e-94/serine/threonine-protein phosphatase 6 catalytic subunit; K15498 serine/threonine-protein phosphatase 6 catalytic subunit [EC:3.1.3.16]	molecular_function:GO:0004721//phosphoprotein phosphatase activity;
PIN_chr1	5435000	5445000	28	1	10000	-1.68035	-0.00992347	0.711983	Pma_10022187	5442174	5443226	XP_022320030.1/1.6e-55/sex peptide receptor-like [Crassostrea virginica]	crg:105323253/5.4e-22/FMRFamide receptor; K04284 growth hormone secretagogue receptor	cellular_component:GO:0016021//integral component of membrane;molecular_function:GO:0008528//G protein-coupled peptide receptor activity;
PIN_chr12	885000	895000	11	1	10000	-1.68184	0.0300031	0.619201	Pma_10020246	887084	892184	XP_011447315.1/3.5e-122/PREDICTED: F-box only protein 8 [Crassostrea gigas]	crg:105342148/3.3e-123/F-box only protein 8; K10294 F-box protein 8	biological_process:GO:0032012//regulation of ARF protein signal transduction;molecular_function:GO:0005086//ARF guanyl-nucleotide exchange factor activity;
PIN_chr14	14660000	14670000	87	1	10000	-1.68557	0.0302837	0.806103	Pma_10026501	14659664	14686066	XP_033725419.1/2.4e-105/uncharacterized protein LOC117315371 [Pecten maximus]	aplc:110986150/6.2e-24/uncharacterized protein LOC110986150 isoform X1; K21754 BTB/POZ domain-containing protein KCTD1/15	NA
PIN_chr6	13140000	13150000	66	1	10000	-1.68593	0.057457	0.731212	Pma_10008689	13141368	13141724	NA	NA	NA
PIN_chr1	65265000	65280000	326	2	15000	-1.68612	0.101191	0.700945	Pma_10005713	65252719	65266614	XP_030852201.1/3.7e-87/histone-binding protein N1/N2-like isoform X1 [Strongylocentrotus purpuratus]	crg:105344820/2.8e-146/histone-binding protein N1/N2-like isoform X1; K11291 nuclear autoantigenic sperm protein	biological_process:GO:0035556//intracellular signal transduction;
PIN_chr9	19210000	19225000	104	2	15000	-1.68672	0.0375406	0.804384	Pma_10022873	19210780	19254783	XP_011413508.1/0.0e+00/PREDICTED: EF-hand calcium-binding domain-containing protein 6-like isoform X4 [Crassostrea gigas]	myi:110456884/2.2e-28/dehydrodolichyl diphosphate synthase complex subunit nus1-like; K19177 dehydrodolichyl diphosphate syntase complex subunit NUS1 [EC:2.5.1.87]	NA
PIN_chr7	20480000	20490000	119	1	10000	-1.68704	0.0771909	0.633344	Pma_10005313	20478131	20504183	XP_019921759.1/7.0e-82/PREDICTED: solute carrier family 28 member 3 isoform X2 [Crassostrea gigas]	crg:105325927/1.4e-82/solute carrier family 28 member 3 isoform X1; K11536 pyrimidine nucleoside transport protein	NA
PIN_chr9	59195000	59210000	272	2	15000	-1.89568	0.265655	0.781116	Pma_10011618	59174540	59205089	XP_022338863.1/2.7e-183/uncharacterized protein LOC111134264 [Crassostrea virginica]	NA	NA
PIN_chr11	435000	450000	4	2	15000	-1.6915	0.0991002	0.812534	Pma_10024860	440721	441905	XP_033762653.1/8.9e-18/uncharacterized protein LOC117344114 [Pecten maximus]	lak:106176753/8.0e-06/uncharacterized protein LOC106176753; K11997 tripartite motif-containing protein 2/3	molecular_function:GO:0008270//zinc ion binding;
PIN_chr6	14460000	14470000	77	1	10000	-1.69558	0.0591035	0.683822	Pma_10005036	14440732	14491411	XP_022342888.1/2.1e-263/E3 ubiquitin-protein ligase MIB2-like isoform X1 [Crassostrea virginica] >XP_022342889.1 E3 ubiquitin-protein ligase MIB2-like isoform X1 [Crassostrea virginica]	lak:106164494/1.8e-156/E3 ubiquitin-protein ligase MIB2 isoform X1; K10645 E3 ubiquitin-protein ligase mind-bomb [EC:2.3.2.27]	molecular_function:GO:0008270//zinc ion binding;GO:0004842//ubiquitin-protein transferase activity;
PIN_chr9	47940000	47955000	253	2	15000	-1.69563	0.047177	0.723797	Pma_10011183	47934382	47950155	XP_022333609.1/2.2e-77/uncharacterized protein LOC111130701 [Crassostrea virginica]	cqu:CpipJ_CPIJ010377/2.7e-06/membrane-associated guanylate kinase; K05631 atrophin-1 interacting protein 3 (BAI1-associated protein 1)	NA
PIN_chr7	20435000	20450000	118	2	15000	-1.69587	0.0777978	0.87183	Pma_10005311	20438851	20447014	XP_009061324.1/1.6e-103/hypothetical protein LOTGIDRAFT_193870 [Lottia gigantea] >ESO88010.1 hypothetical protein LOTGIDRAFT_193870 [Lottia gigantea]	spis:111322263/2.7e-50/mitochondrial ribosome-associated GTPase 2-like; K03979 GTPase [EC:3.6.5.-]	molecular_function:GO:0005525//GTP binding;
PIN_chr9	64615000	64630000	348	2	15000	-1.70122	0.131564	0.672681	Pma_10011141	64616572	64625553	XP_011455130.1/2.4e-175/PREDICTED: dnaJ homolog subfamily B member 13 [Crassostrea gigas]	crg:105347667/2.3e-176/dnaJ homolog subfamily B member 13; K09519 DnaJ homolog subfamily B member 13	biological_process:GO:0006457//protein folding;molecular_function:GO:0051082//unfolded protein binding;
PIN_chr1	14850000	14860000	88	1	10000	-1.70284	-0.02557	0.684124	Pma_10023102	14855048	14857997	XP_013080486.1/5.3e-12/PREDICTED: uncharacterized protein LOC106066060 [Biomphalaria glabrata]	NA	NA
PIN_chr14	17185000	17200000	101	2	15000	-1.70322	0.0364458	0.679796	Pma_10016641	17191645	17194966	XP_011441820.1/3.1e-55/PREDICTED: uncharacterized protein LOC105338410 [Crassostrea gigas]	NA	NA
PIN_chr14	17185000	17200000	101	2	15000	-1.70322	0.0364458	0.679796	Pma_10016642	17198396	17206459	XP_011441821.1/3.8e-297/PREDICTED: uncharacterized protein LOC105338411 [Crassostrea gigas]	NA	NA
PIN_chr6	23815000	23830000	142	2	15000	-1.70547	0.0495752	0.865578	Pma_10021815	23819211	23822276	XP_011420001.1/1.8e-103/PREDICTED: uncharacterized protein LOC105322807 [Crassostrea gigas]	NA	NA
PIN_chr8	3890000	3900000	20	1	10000	-1.7064	0.134306	0.701368	Pma_10008401	3888996	3890262	XP_021369693.1/5.9e-34/zinc finger homeobox protein 4-like [Mizuhopecten yessoensis]	NA	NA
PIN_chr7	28205000	28220000	163	2	15000	-1.70688	0.0555889	0.852519	Pma_10024381	28211089	28227469	XP_022293946.1/3.4e-38/uncharacterized protein LOC111104343 [Crassostrea virginica]	NA	NA
PIN_chr5	53910000	53920000	320	1	10000	-1.70701	0.00822807	0.720779	Pma_10018072	53893246	53961276	XP_011446824.1/0.0e+00/PREDICTED: uncharacterized protein LOC105341802 [Crassostrea gigas]	tca:103312422/1.1e-14/histone-lysine N-methyltransferase SETMAR-like; K11433 histone-lysine N-methyltransferase SETMAR [EC:2.1.1.43]	cellular_component:GO:0016021//integral component of membrane;
PIN_chr5	53545000	53555000	318	1	10000	-1.70875	0.086392	0.606722	Pma_10012856	53553746	53557977	XP_030764010.1/1.3e-37/putative inorganic phosphate cotransporter isoform X2 [Sitophilus oryzae]	myi:110454518/8.1e-38/sialin-like; K12301 MFS transporter, ACS family, solute carrier family 17 (sodium-dependent inorganic phosphate cotransporter), member 5	NA
PIN_chr2	51460000	51470000	288	1	10000	-1.71127	0.0654428	0.619942	Pma_10018371	51460834	51461775	XP_011418345.1/3.9e-16/PREDICTED: uncharacterized protein LOC105321674 [Crassostrea gigas]	crg:105340765/1.0e-11/uncharacterized protein LOC105340765; K11997 tripartite motif-containing protein 2/3	molecular_function:GO:0008270//zinc ion binding;
PIN_chr2	51460000	51470000	288	1	10000	-1.71127	0.0654428	0.619942	Pma_10018372	51465795	51467447	XP_022304360.1/4.0e-32/tripartite motif-containing protein 3-like [Crassostrea virginica] >XP_022304368.1 tripartite motif-containing protein 3-like [Crassostrea virginica]	crg:105335497/1.5e-26/tripartite motif-containing protein 2-like; K11997 tripartite motif-containing protein 2/3	molecular_function:GO:0008270//zinc ion binding;
PIN_chr4	20595000	20605000	125	1	10000	-1.71206	0.126893	0.790939	Pma_10021238	20604024	20605076	XP_011423132.1/1.0e-20/PREDICTED: uncharacterized protein LOC105325312 [Crassostrea gigas]	crg:105325726/2.0e-08/transcription intermediary factor 1-beta; K11997 tripartite motif-containing protein 2/3	molecular_function:GO:0008270//zinc ion binding;
PIN_chr13	12610000	12620000	67	1	10000	-1.71291	0.0969848	0.753222	Pma_10015889	12607815	12732552	XP_033728105.1/0.0e+00/LOW QUALITY PROTEIN: titin-like [Pecten maximus]	crg:105342773/0.0e+00/titin isoform X1; K12567 titin [EC:2.7.11.1]	NA
PIN_chr8	2835000	2845000	14	1	10000	-1.71314	0.0192382	0.615058	Pma_10004372	2839856	2842561	XP_022311035.1/0.0e+00/uncharacterized protein LOC111116344 [Crassostrea virginica]	NA	NA
PIN_chr3	53765000	53775000	250	1	10000	-1.398	0.177232	0.649512	Pma_10013749	53753528	53778684	XP_021347494.1/1.6e-277/multidrug resistance-associated protein 7-like isoform X1 [Mizuhopecten yessoensis] >XP_021347495.1 multidrug resistance-associated protein 7-like isoform X1 [Mizuhopecten yessoensis] >XP_021347496.1 multidrug resistance-associated protein 7-like isoform X1 [Mizuhopecten yessoensis] >XP_021347497.1 multidrug resistance-associated protein 7-like isoform X1 [Mizuhopecten yes…	myi:110446601/1.5e-278/multidrug resistance-associated protein 7-like isoform X1; K05674 ATP-binding cassette, subfamily C (CFTR/MRP), member 10	cellular_component:GO:0016021//integral component of membrane;molecular_function:GO:0005524//ATP binding;GO:0042626//ATPase-coupled transmembrane transporter activity;GO:0016887//ATPase activity;
PIN_chr12	19205000	19215000	116	1	10000	-1.71501	0.0607521	0.690254	Pma_511.448	19194631	19223380	NA	NA	NA
PIN_chr9	23905000	23915000	126	1	10000	-1.71708	0.0519268	0.611405	Pma_10016320	23912204	23914249	XP_022304023.1/4.0e-74/LOW QUALITY PROTEIN: uncharacterized protein LOC111111368 [Crassostrea virginica]	myi:110441217/7.3e-47/uncharacterized protein LOC110441217; K17834 cyclic GMP-AMP synthase [EC:2.7.7.86]	NA
PIN_chr6	28350000	28370000	174	3	20000	-1.71851	0.0387637	0.703966	Pma_10007541	28361510	28362190	XP_033740170.1/5.2e-07/uncharacterized protein LOC117327343 [Pecten maximus] >XP_033740171.1 uncharacterized protein LOC117327343 [Pecten maximus]	NA	NA
PIN_chr5	16575000	16585000	101	1	10000	-1.71903	0.0107034	0.644636	Pma_10026666	16564068	16590164	NA	NA	NA
PIN_chr9	46360000	46370000	239	1	10000	-1.71912	0.0835168	0.874428	Pma_10017960	46353606	46377469	XP_011433487.1/0.0e+00/PREDICTED: disks large homolog 5 isoform X2 [Crassostrea gigas]	zne:110830123/2.8e-48/tight junction protein ZO-1 isoform X1; K05701 tight junction protein 1	NA
PIN_chr6	13945000	13955000	71	1	10000	-1.71922	-0.0347222	0.616876	Pma_10004934	13951384	13960984	XP_022345565.1/1.3e-113/cathepsin L-like isoform X2 [Crassostrea virginica] >XP_022345566.1 cathepsin L-like isoform X2 [Crassostrea virginica] >XP_022345567.1 cathepsin L-like isoform X2 [Crassostrea virginica] >XP_022345568.1 cathepsin L-like isoform X2 [Crassostrea virginica]	crg:105344064/8.6e-113/cathepsin L1; K01373 cathepsin F [EC:3.4.22.41]	molecular_function:GO:0008234//cysteine-type peptidase activity;
PIN_chr6	13945000	13955000	71	1	10000	-1.71922	-0.0347222	0.616876	Pma_10004935	13954493	13973207	PIK61247.1/9.4e-103/reverse transcriptase [Apostichopus japonicus]	npr:108804825/4.1e-53/TUBGCP6; gamma-tubulin complex component 6; K16573 gamma-tubulin complex component 6	molecular_function:GO:0003964//RNA-directed DNA polymerase activity;GO:0003676//nucleic acid binding;
PIN_chr10	12480000	12495000	59	2	15000	-1.72041	0.0298147	0.795574	Pma_10004207	12489570	12496085	XP_022309921.1/1.1e-102/uncharacterized protein LOC111115461 [Crassostrea virginica]	pmac:106717169/6.5e-10/dnaJ homolog subfamily C member 22; K19370 DnaJ homolog subfamily C member 22	cellular_component:GO:0016021//integral component of membrane;
PIN_chr11	38975000	38985000	216	1	10000	-1.72064	0.0737586	0.800959	Pma_10024398	38976461	38978151	XP_019918675.1/1.8e-15/PREDICTED: THAP domain-containing protein 11-like [Crassostrea gigas]	NA	NA
PIN_chr6	32195000	32205000	205	1	10000	-1.72118	0.0428996	0.605824	Pma_10025527	32204580	32210834	NA	NA	NA
PIN_chr7	33025000	33035000	194	1	10000	-1.7213	0.00988926	0.747648	Pma_10015860	33025478	33026686	XP_033762511.1/5.7e-105/WD repeat-containing protein 74-like [Pecten maximus]	myi:110465091/1.2e-105/WD repeat-containing protein 74-like; K14841 ribosome biogenesis protein NSA1	biological_process:GO:0042273//ribosomal large subunit biogenesis;cellular_component:GO:0005730//nucleolus;
PIN_chr2	51075000	51085000	286	1	10000	-1.72357	0.0225693	0.630594	Pma_10011242	51078453	51079604	XP_033739584.1/7.0e-44/uncharacterized protein LOC117326894 [Pecten maximus]	NA	NA
PIN_chr3	17620000	17635000	93	2	15000	-1.72397	-0.00237755	0.710651	Pma_10031097	17618760	17620273	XP_002598118.1/4.6e-25/hypothetical protein BRAFLDRAFT_85664, partial [Branchiostoma floridae]	pdam:113682219/1.4e-24/mucin-like protein; K22017 mucin-4	cellular_component:GO:0016020//membrane;molecular_function:GO:0005044//scavenger receptor activity;
PIN_chr10	82145000	82155000	413	1	10000	-1.72444	0.0488488	0.726368	Pma_10004509	82142809	82173666	KTG37814.1/8.2e-132/hypothetical protein cypCar_00045839, partial [Cyprinus carpio]	crg:105333496/2.6e-117/diacylglycerol kinase delta; K00901 diacylglycerol kinase (ATP) [EC:2.7.1.107]	NA
PIN_chr7	14540000	14555000	86	2	15000	-1.72463	0.0777751	0.854097	Pma_10025353	14536528	14548783	BAM76249.1/4.2e-181/hypothetical protein [Pinctada fucata]	myi:110450424/1.9e-59/uncharacterized protein LOC110450424 isoform X1; K17341 hemicentin	NA
PIN_chr6	1205000	1215000	8	1	10000	-1.72496	0.0552661	0.689406	Pma_10016752	1205829	1208049	XP_011426398.1/5.9e-105/PREDICTED: prostaglandin E2 receptor EP4 subtype [Crassostrea gigas]	crg:105327545/5.5e-106/prostaglandin E2 receptor EP4 subtype; K04261 prostaglandin E receptor 4	cellular_component:GO:0016021//integral component of membrane;molecular_function:GO:0004960//thromboxane receptor activity;
PIN_chr6	1205000	1215000	8	1	10000	-1.72496	0.0552661	0.689406	Pma_10016753	1209493	1295369	XP_033753123.1/4.9e-134/signal peptide, CUB and EGF-like domain-containing protein 1 [Pecten maximus]	aplc:110979768/3.9e-33/sushi, von Willebrand factor type A, EGF and pentraxin domain-containing protein 1-like; K17495 CUB and sushi domain-containing protein	NA
PIN_chr9	23005000	23015000	120	1	10000	-1.7251	0.0213588	0.714076	Pma_10014909	23004380	23025532	XP_011432714.1/1.0e-07/PREDICTED: platelet endothelial aggregation receptor 1 isoform X4 [Crassostrea gigas]	NA	biological_process:GO:0007155//cell adhesion;cellular_component:GO:0016021//integral component of membrane;molecular_function:GO:0004222//metalloendopeptidase activity;
PIN_chr1	3245000	3255000	14	1	10000	-1.72512	0.0148501	0.786284	Pma_77.328	3250593	3251396	NA	NA	NA
PIN_chr9	62685000	62700000	336	2	15000	-1.72548	0.0347911	0.688892	Pma_10005015	62689471	62704311	RLU23768.1/2.2e-101/hypothetical protein DMN91_003976 [Ooceraea biroi]	crg:105332983/7.4e-100/26S proteasome non-ATPase regulatory subunit 6; K03037 26S proteasome regulatory subunit N7	cellular_component:GO:0000502//proteasome complex;molecular_function:GO:0030234//enzyme regulator activity;
PIN_chr14	14045000	14060000	82	2	15000	-1.72592	0.142227	0.757876	Pma_10011124	14012485	14047195	XP_022325952.1/0.0e+00/protein disulfide-isomerase A5-like isoform X1 [Crassostrea virginica]	crg:105322791/0.0e+00/protein disulfide-isomerase A5; K09583 protein disulfide-isomerase A5 [EC:5.3.4.1]	biological_process:GO:0045454//cell redox homeostasis;molecular_function:GO:0016853//isomerase activity;
PIN_chr14	14045000	14060000	82	2	15000	-1.72592	0.142227	0.757876	Pma_10011125	14052789	14056626	XP_001514490.1/3.4e-20/26S proteasome complex subunit SEM1 [Ornithorhynchus anatinus]	crg:105322792/2.6e-31/26S proteasome complex subunit DSS1-like; K10881 26 proteasome complex subunit DSS1	biological_process:GO:0043687//post-translational protein modification;GO:0038061//NIK/NF-kappaB signaling;GO:0006406//mRNA export from nucleus;GO:0043248//proteasome assembly;GO:0031146//SCF-dependent proteasomal ubiquitin-dependent protein catabolic process;GO:0006521//regulation of cellular amino acid metabolic process;GO:0070498//interleukin-1-mediated signaling pathway;GO:0010972//negative r…
PIN_chr3	46360000	46370000	245	1	10000	-1.72605	0.0985969	0.645612	Pma_10013505	46361434	46364318	XP_022316859.1/5.1e-11/cholecystokinin receptor type A-like [Crassostrea virginica]	crg:105319762/1.4e-08/cholecystokinin receptor; K04194 cholecystokinin A receptor	NA
PIN_chr10	60405000	60415000	301	1	10000	-1.72902	-0.00155232	0.746304	Pma_10021440	60402201	60405130	NA	NA	NA
PIN_chr5	3925000	3935000	28	1	10000	-1.73534	-0.00121637	0.666059	Pma_10010892	3920417	3925631	XP_022326000.1/1.1e-51/deoxyribonuclease-2-alpha-like isoform X1 [Crassostrea virginica]	crg:105335715/2.5e-51/plancitoxin-1 isoform X1; K01158 deoxyribonuclease II [EC:3.1.22.1]	NA
PIN_chr14	41300000	41315000	235	2	15000	-1.73605	0.0736032	0.669229	Pma_10002237	41311170	41329058	XP_021342696.1/4.2e-72/RUN domain-containing protein 3B-like [Mizuhopecten yessoensis] >OWF35338.1 RUN domain-containing protein 3B [Mizuhopecten yessoensis]	oas:101122517/8.2e-15/phosphatidylcholine translocator ABCB4 isoform X1; K05659 ATP-binding cassette, subfamily B (MDR/TAP), member 4 [EC:7.6.2.2]	NA
PIN_chr2	14355000	14370000	87	2	15000	-1.7362	0.0463901	0.642255	Pma_10009259	14348229	14375734	XP_022335274.1/1.0e-299/Bardet-Biedl syndrome 1 protein homolog isoform X1 [Crassostrea virginica]	crg:105320874/4.4e-298/Bardet-Biedl syndrome 1 protein isoform X1; K16746 Bardet-Biedl syndrome 1 protein	NA
PIN_chr9	95760000	95770000	519	1	10000	-1.73647	0.0191871	0.647503	Pma_10009633	95757376	95769447	XP_022341893.1/4.1e-103/uncharacterized protein LOC111135805 isoform X1 [Crassostrea virginica]	NA	NA
PIN_chr3	24945000	24955000	127	1	10000	-1.73986	0.0330033	0.608888	Pma_10003124	24946572	24954448	XP_011434053.1/1.2e-175/PREDICTED: 26S proteasome non-ATPase regulatory subunit 6 [Crassostrea gigas]	crg:105332983/1.1e-176/26S proteasome non-ATPase regulatory subunit 6; K03037 26S proteasome regulatory subunit N7	cellular_component:GO:0000502//proteasome complex;molecular_function:GO:0030234//enzyme regulator activity;
PIN_chr5	38305000	38315000	229	1	10000	-1.74202	0.0669631	0.627098	Pma_10020163	38290249	38315390	XP_011455027.1/2.3e-206/PREDICTED: protein zer-1 homolog [Crassostrea gigas] >XP_011455029.1 PREDICTED: protein zer-1 homolog [Crassostrea gigas] >XP_019930598.1 PREDICTED: protein zer-1 homolog [Crassostrea gigas]	myi:110451910/2.1e-207/protein zer-1 homolog; K10350 Zyg-11 protein homolog	NA
PIN_chr13	3655000	3665000	18	1	10000	-1.74304	0.00225723	0.62239	Pma_10012552	3664315	3670436	OWF56629.1/1.1e-147/G-protein coupled receptor Mth2 [Mizuhopecten yessoensis]	crg:109620456/2.1e-37/probable G-protein coupled receptor Mth-like 4; K04599 G protein-coupled receptor Mth (Methuselah protein)	biological_process:GO:0007166//cell surface receptor signaling pathway;cellular_component:GO:0016021//integral component of membrane;molecular_function:GO:0004930//G protein-coupled receptor activity;
PIN_chr12	5270000	5280000	36	1	10000	-1.74322	0.0412185	0.64223	Pma_10007277	5278696	5319876	XP_011443588.1/0.0e+00/PREDICTED: transcription initiation factor TFIID subunit 1 [Crassostrea gigas]	crg:105339649/0.0e+00/transcription initiation factor TFIID subunit 1; K03125 transcription initiation factor TFIID subunit 1	molecular_function:GO:0003743//translation initiation factor activity;
PIN_chr12	43400000	43410000	249	1	10000	-1.74368	0.0394853	0.616758	Pma_10028906	43396194	43413272	XP_011443432.1/2.7e-43/PREDICTED: gephyrin isoform X2 [Crassostrea gigas]	myi:110446498/2.8e-43/gephyrin-like; K15376 gephyrin [EC:2.10.1.1 2.7.7.75]	biological_process:GO:0006777//Mo-molybdopterin cofactor biosynthetic process;GO:0032324//molybdopterin cofactor biosynthetic process;molecular_function:GO:0061598//molybdopterin adenylyltransferase activity;GO:0046872//metal ion binding;GO:0005524//ATP binding;GO:0061599//molybdopterin molybdotransferase activity;
PIN_chr2	49505000	49515000	277	1	10000	-1.74654	0.197941	0.62213	Pma_10019177	49501760	49505440	NA	NA	NA
PIN_chr4	19410000	19420000	117	1	10000	-1.74837	0.0300862	0.859925	Pma_382.303	19419880	19420596	NA	NA	NA
PIN_chr9	94775000	94785000	515	1	10000	-1.74922	0.101562	0.836105	Pma_10020629	94745898	94781333	XP_033740886.1/7.0e-59/cholesterol 24-hydroxylase-like isoform X1 [Pecten maximus] >XP_033740887.1 cholesterol 24-hydroxylase-like isoform X1 [Pecten maximus]	myi:110442672/1.8e-57/cholesterol 24-hydroxylase-like isoform X1; K07440 cholesterol 24-hydroxylase [EC:1.14.14.25]	biological_process:GO:0006707//cholesterol catabolic process;molecular_function:GO:0033781//cholesterol 24-hydroxylase activity;GO:0020037//heme binding;GO:0005506//iron ion binding;
PIN_chr11	11680000	11695000	67	2	15000	-1.75063	0.0362833	0.691265	Pma_10001773	11682161	11698620	XP_033748444.1/0.0e+00/HEAT repeat-containing protein 6-like [Pecten maximus]	NA	NA
PIN_chr7	15555000	15580000	89	3	25000	-1.75334	0.0354564	0.68983	Pma_10016489	15567099	15581294	XP_011434669.1/7.7e-190/PREDICTED: probable ubiquitin carboxyl-terminal hydrolase FAM188B [Crassostrea gigas]	crg:105333412/7.2e-191/probable ubiquitin carboxyl-terminal hydrolase FAM188B; K22647 ubiquitin carboxyl-terminal hydrolase MINDY-3/4 [EC:3.4.19.12]	NA
PIN_chr8	26300000	26310000	146	1	10000	-1.757	0.128193	0.658783	Pma_10013531	26291368	26327877	KOF94304.1/2.5e-21/hypothetical protein OCBIM_22002174mg, partial [Octopus bimaculoides]	dpo:Dpse_GA22871/3.1e-19/uncharacterized protein; K11429 histone-lysine N-methyltransferase SUV420H [EC:2.1.1.43]	biological_process:GO:0051726//regulation of cell cycle;cellular_component:GO:0016021//integral component of membrane;molecular_function:GO:0031151//histone methyltransferase activity (H3-K79 specific);
PIN_chr1	72670000	72680000	361	1	10000	-1.76226	0.0616055	0.617847	Pma_10027483	72670639	72681137	XP_022317510.1/2.8e-13/ectonucleotide pyrophosphatase/phosphodiesterase family member 5-like [Crassostrea virginica]	crg:105327753/1.7e-13/ectonucleotide pyrophosphatase/phosphodiesterase family member 5; K18398 ectonucleotide pyrophosphatase/phosphodiesterase family member 5 [EC:3.1.-.-]	cellular_component:GO:0016021//integral component of membrane;molecular_function:GO:0003824//catalytic activity;
PIN_chr5	10645000	10655000	61	1	10000	-1.7658	0.0426712	0.64182	Pma_10006514	10641413	10687959	XP_022345713.1/4.6e-79/transient receptor potential cation channel subfamily M member 2-like [Crassostrea virginica]	myi:110456226/1.1e-72/transient receptor potential cation channel subfamily M member 2-like isoform X1; K04977 transient receptor potential cation channel subfamily M member 2 [EC:3.6.1.13]	NA
PIN_chr2	32800000	32810000	179	1	10000	-1.7726	0.0189453	0.628749	Pma_10002102	32809371	32813324	XP_021361292.1/1.9e-06/uncharacterized protein LOC110455464 isoform X2 [Mizuhopecten yessoensis] >OWF46633.1 hypothetical protein KP79_PYT10302 [Mizuhopecten yessoensis]	NA	NA
PIN_chr10	64000000	64010000	316	1	10000	-1.7736	0.125408	0.640095	Pma_10016349	63999772	64001748	XP_011453597.1/3.4e-63/PREDICTED: MORN repeat-containing protein 4 [Crassostrea gigas] >XP_011453598.1 PREDICTED: MORN repeat-containing protein 4 [Crassostrea gigas] >XP_019930260.1 PREDICTED: MORN repeat-containing protein 4 [Crassostrea gigas]	aplc:110988339/6.0e-15/radial spoke head 1 homolog; K19755 radial spoke head protein 1	NA
PIN_chr10	64000000	64010000	316	1	10000	-1.7736	0.125408	0.640095	Pma_10016350	64002815	64012717	XP_011453599.2/2.9e-203/PREDICTED: ligand-dependent nuclear receptor corepressor-like protein [Crassostrea gigas]	crg:105346628/2.7e-204/ligand-dependent nuclear receptor corepressor-like protein; K20015 ecdysone-induced protein 93F, isoform B	cellular_component:GO:0005634//nucleus;molecular_function:GO:0003677//DNA binding;
PIN_chr3	22570000	22585000	112	2	15000	-1.77396	0.0828334	0.745588	Pma_10005455	22540897	22573925	XP_013088867.1/1.4e-247/PREDICTED: cysteine--tRNA ligase, cytoplasmic-like isoform X2 [Biomphalaria glabrata]	srx:107740410/5.3e-242/cysteine--tRNA ligase, cytoplasmic-like isoform X1; K01883 cysteinyl-tRNA synthetase [EC:6.1.1.16]	biological_process:GO:0006423//cysteinyl-tRNA aminoacylation;molecular_function:GO:0004817//cysteine-tRNA ligase activity;GO:0005524//ATP binding;
PIN_chr6	9630000	9645000	46	2	15000	-1.79376	0.473135	0.825659	Pma_10014475	9607399	9636431	XP_011423159.1/1.4e-185/PREDICTED: uncharacterized protein LOC105325338 [Crassostrea gigas] >XP_011423173.1 PREDICTED: uncharacterized protein LOC105325338 [Crassostrea gigas]	crg:105325338/1.3e-186/uncharacterized protein LOC105325338; K01179 endoglucanase [EC:3.2.1.4]	NA
PIN_chr5	39600000	39610000	235	1	10000	-1.78004	0.109278	0.696547	Pma_10025607	39592287	39602826	XP_019928335.1/4.6e-75/PREDICTED: WASH complex subunit FAM21 [Crassostrea gigas]	crg:105341872/4.3e-76/WASH complex subunit FAM21; K18462 WASH complex subunit FAM21	NA
PIN_chr8	21680000	21690000	118	1	10000	-1.78141	0.0284413	0.621026	Pma_10002610	21668805	21681926	XP_022325657.1/2.5e-149/monocarboxylate transporter 9-like isoform X2 [Crassostrea virginica]	crg:105339637/2.9e-52/monocarboxylate transporter 14-like; K08190 MFS transporter, MCP family, solute carrier family 16 (monocarboxylic acid transporters), member 14	NA
PIN_chr6	52645000	52660000	330	2	15000	-1.78654	0.0468864	0.810544	Pma_10018625	52657541	52661898	XP_011433302.2/0.0e+00/PREDICTED: uncharacterized protein LOC105332399 [Crassostrea gigas]	pxy:105391721/5.4e-105/uncharacterized LOC105391721; K10848 DNA excision repair protein ERCC-4 [EC:3.1.-.-]	NA
PIN_chr12	40085000	40100000	228	2	15000	-1.78995	0.000602061	0.759921	Pma_10010406	40079303	40087288	XP_033742246.1/2.9e-101/glycine receptor subunit alpha-3-like [Pecten maximus] >XP_033742247.1 glycine receptor subunit alpha-3-like [Pecten maximus]	myi:110457229/3.2e-100/glycine receptor subunit alphaZ1-like isoform X1; K05195 glycine receptor alpha-3	NA
PIN_chr6	4955000	4965000	30	1	10000	-1.79568	-0.0329887	0.613789	Pma_10032328	4936855	4981571	XP_011445963.1/1.1e-187/PREDICTED: transmembrane and coiled-coil domain-containing protein 4 isoform X2 [Crassostrea gigas]	crg:105322327/6.5e-71/adipolin; K21410 adipolin	cellular_component:GO:0016021//integral component of membrane;
PIN_chr9	55365000	55380000	293	2	15000	-1.79648	0.0503554	0.716219	Pma_10019915	55366620	55399621	XP_011417043.1/0.0e+00/PREDICTED: DENN domain-containing protein 5A isoform X5 [Crassostrea gigas]	crg:105320695/0.0e+00/DENN domain-containing protein 5A isoform X1; K20164 DENN domain-containing protein 5	NA
PIN_chr7	33300000	33310000	196	1	10000	-1.80095	0.203531	0.743702	Pma_10028355	33302834	33304735	XP_022297687.1/1.6e-64/uncharacterized protein LOC111107038 [Crassostrea virginica]	myi:110441217/3.8e-42/uncharacterized protein LOC110441217; K17834 cyclic GMP-AMP synthase [EC:2.7.7.86]	NA
PIN_chr7	8405000	8415000	53	1	10000	-1.80381	0.034765	0.653273	Pma_10020925	8411194	8414015	XP_011426920.1/4.3e-25/PREDICTED: uncharacterized protein LOC105327936 [Crassostrea gigas]	NA	NA
PIN_chr11	15140000	15155000	84	2	15000	-1.81654	0.0989041	0.656631	Pma_10007347	15148095	15154859	NA	NA	NA
PIN_chr5	2480000	2490000	16	1	10000	-1.81729	0.0453457	0.667887	Pma_10004157	2483968	2500600	XP_022305079.1/2.3e-132/tubulin-specific chaperone cofactor E-like protein [Crassostrea virginica] >XP_022305086.1 tubulin-specific chaperone cofactor E-like protein [Crassostrea virginica]	crg:105342478/8.1e-101/tubulin-specific chaperone cofactor E-like protein; K22449 tubulin-specific chaperone cofactor E-like protein	NA
PIN_chr3	89630000	89640000	463	1	10000	-1.81824	0.123011	0.657009	Pma_236.226	89638048	89639199	NA	NA	NA
PIN_chr4	33615000	33630000	208	2	15000	-1.82189	0.0120865	0.648774	Pma_10012061	33616650	33617039	XP_021355484.1/1.7e-21/alpha-crystallin B chain-like [Mizuhopecten yessoensis]	dmo:Dmoj_GI19527/1.9e-12/uncharacterized protein; K09542 crystallin, alpha B	NA
PIN_chr14	46075000	46085000	268	1	10000	-1.82288	0.0537011	0.663091	Pma_10006620	46083556	46086235	XP_019919474.1/4.3e-47/PREDICTED: putative GPI-anchored protein pfl2 [Crassostrea gigas]	NA	NA
PIN_chr14	46075000	46085000	268	1	10000	-1.82288	0.0537011	0.663091	Pma_10006622	46076508	46082906	NA	NA	NA
PIN_chr11	53745000	53755000	291	1	10000	-1.8254	0.0305812	0.611584	Pma_10018494	53748217	53750778	XP_033757984.1/2.5e-206/uncharacterized protein LOC117340325 [Pecten maximus]	npr:108804825/6.4e-24/TUBGCP6; gamma-tubulin complex component 6; K16573 gamma-tubulin complex component 6	NA
PIN_chr6	47860000	47885000	300	3	25000	-1.83367	0.0869106	0.827544	Pma_10027689	47861212	47862567	XP_011421008.1/7.1e-128/PREDICTED: uncharacterized protein LOC105323638 [Crassostrea gigas]	bpec:110165918/1.4e-17/slc15a5; solute carrier family 15 member 5; K14639 solute carrier family 15, member 5	biological_process:GO:0015074//DNA integration;
PIN_chr6	47860000	47885000	300	3	25000	-1.83367	0.0869106	0.827544	Pma_10027690	47866136	47868143	XP_019929652.1/1.2e-14/PREDICTED: uncharacterized protein LOC109620849 [Crassostrea gigas]	crg:105328813/7.2e-10/uncharacterized protein LOC105328813; K23092 putative nucleotidyltransferase [EC:2.7.7.-]	NA
PIN_chr3	52805000	52815000	281	1	10000	-1.83771	0.0702085	0.680624	Pma_10003882	52810539	52876260	XP_022300291.1/2.7e-164/stabilin-2-like [Crassostrea virginica]	crg:105340170/1.2e-164/stabilin-2; K19013 stabilin-2	cellular_component:GO:0016021//integral component of membrane;
PIN_chr9	61815000	61830000	332	2	15000	-1.84568	0.0649082	0.79225	Pma_10014048	61815762	61823690	AVP74315.1/1.0e-110/Toll-like receptor 1 [Argopecten irradians]	myi:110443415/7.6e-109/toll-like receptor 3; K18808 toll-like receptor 13	biological_process:GO:0007165//signal transduction;GO:0045087//innate immune response;cellular_component:GO:0016021//integral component of membrane;
PIN_chr3	40770000	40780000	212	1	10000	-1.84943	0.0563864	0.77071	Pma_10025378	40761777	40782080	KRZ02604.1/1.6e-156/Enolase, partial [Trichinella zimbabwensis]	pss:102454770/6.6e-137/ENO3; beta-enolase; K01689 enolase [EC:4.2.1.11]	biological_process:GO:0006096//glycolytic process;cellular_component:GO:0000015//phosphopyruvate hydratase complex;molecular_function:GO:0000287//magnesium ion binding;GO:0004634//phosphopyruvate hydratase activity;
PIN_chr14	39815000	39825000	225	1	10000	-1.85513	0.0576662	0.750657	Pma_10017118	39814366	39816397	XP_021347537.1/8.7e-81/transmembrane and ubiquitin-like domain-containing protein 1 [Mizuhopecten yessoensis] >OWF53269.1 Transmembrane and ubiquitin-like domain-containing protein 1 [Mizuhopecten yessoensis]	cmk:103178527/5.4e-09/pnn, pinin; pinin, desmosome associated protein; K13114 pinin	biological_process:GO:0030433//ubiquitin-dependent ERAD pathway;cellular_component:GO:0016021//integral component of membrane;
PIN_chr9	52415000	52425000	270	1	10000	-1.85821	0.0243872	0.746563	Pma_10031163	52407674	52415284	XP_022286687.1/2.0e-73/charged multivesicular body protein 2b-like [Crassostrea virginica] >XP_022287115.1 charged multivesicular body protein 2b-like [Crassostrea virginica]	crg:105333773/1.4e-72/charged multivesicular body protein 2b isoform X2; K12192 charged multivesicular body protein 2B	biological_process:GO:0007034//vacuolar transport;
PIN_chr9	52415000	52425000	270	1	10000	-1.85821	0.0243872	0.746563	Pma_10031164	52417582	52418625	XP_022332545.1/2.5e-101/DNA repair protein XRCC3-like [Crassostrea virginica]	crg:105333345/4.5e-101/DNA repair protein XRCC3; K10880 DNA-repair protein XRCC3	biological_process:GO:0006281//DNA repair;molecular_function:GO:0003677//DNA binding;GO:0005524//ATP binding;GO:0008094//DNA-dependent ATPase activity;
PIN_chr10	49380000	49390000	243	1	10000	-1.85944	0.0277957	0.634727	Pma_10008646	49388962	49390564	NA	NA	NA
PIN_chr14	28510000	28525000	169	2	15000	-1.86113	0.0187707	0.673231	Pma_10032005	28487015	28511806	XP_001329422.1/1.6e-11/ankyrin repeat protein [Trichomonas vaginalis G3] >EAY17199.1 ankyrin repeat protein, putative [Trichomonas vaginalis G3]	NA	NA
PIN_chr7	1570000	1580000	8	1	10000	-1.86446	0.103047	0.679714	Pma_10014177	1575710	1586643	NA	NA	NA
PIN_chr5	49230000	49245000	288	2	15000	-1.87342	0.0285372	0.778155	Pma_10021107	49231940	49234023	XP_033735871.1/2.8e-268/ankyrin-1-like [Pecten maximus]	myi:110456293/5.3e-267/uncharacterized protein LOC110456293; K16726 ankyrin repeat domain-containing protein 17	NA
PIN_chr5	49230000	49245000	288	2	15000	-1.87342	0.0285372	0.778155	Pma_10021108	49241328	49245618	XP_011421611.1/3.6e-66/PREDICTED: uncharacterized protein LOC105324256 isoform X2 [Crassostrea gigas]	nfu:107388482/1.9e-09/cald1; caldesmon isoform X1; K12327 caldesmon	molecular_function:GO:0008270//zinc ion binding;GO:0003676//nucleic acid binding;
PIN_chr6	51275000	51285000	322	1	10000	-1.87406	0.0305998	0.65435	Pma_502.97	51269587	51291906	NA	NA	NA
PIN_chr10	64760000	64770000	319	1	10000	-1.87433	0.058689	0.80553	Pma_10009882	64760621	64761583	AJO68011.1/3.0e-72/RAG1L [Branchiostoma belcheri]	aplc:110976285/3.7e-57/V(D)J recombination-activating protein 1-like isoform X1; K10628 V(D)J recombination-activating protein 1 [EC:2.3.2.27]	biological_process:GO:0010390//histone monoubiquitination;GO:0033077//T cell differentiation in thymus;GO:0033151//V(D)J recombination;GO:0030183//B cell differentiation;cellular_component:GO:0005634//nucleus;molecular_function:GO:0042393//histone binding;GO:0061630//ubiquitin protein ligase activity;GO:0042803//protein homodimerization activity;GO:0043565//sequence-specific DNA binding;GO:000827…
PIN_chr10	64760000	64770000	319	1	10000	-1.87433	0.058689	0.80553	Pma_10009884	64763083	64764447	XP_033635627.1/1.1e-46/uncharacterized protein LOC117296695 [Asterias rubens]	lcf:108898916/3.2e-06/lysine-specific demethylase 5B-like; K11446 histone demethylase JARID1 [EC:1.14.11.-]	molecular_function:GO:0046872//metal ion binding;
PIN_chr3	75180000	75190000	395	1	10000	-1.87603	0.112746	0.69198	Pma_10003397	75172250	75193384	XP_011429778.1/0.0e+00/PREDICTED: leucine-rich repeat and IQ domain-containing protein 1 [Crassostrea gigas]	amex:103034179/2.0e-42/mdc1; LOW QUALITY PROTEIN: mediator of DNA damage checkpoint protein 1; K20780 mediator of DNA damage checkpoint protein 1	NA
PIN_chr9	86290000	86305000	469	2	15000	-1.87685	0.004863	0.644824	Pma_10018253	86292341	86295945	XP_019921718.1/5.5e-67/PREDICTED: protein toll-like [Crassostrea gigas]	crg:105325814/5.1e-68/protein toll-like; K18809 protein toll	biological_process:GO:0007165//signal transduction;cellular_component:GO:0016021//integral component of membrane;
PIN_chr1	86930000	86945000	444	2	15000	-1.8771	0.148699	0.657882	Pma_10001767	86927846	86935803	XP_022314657.1/1.4e-95/uncharacterized protein LOC111119104 [Crassostrea virginica] >XP_022314659.1 uncharacterized protein LOC111119104 [Crassostrea virginica] >XP_022314660.1 uncharacterized protein LOC111119104 [Crassostrea virginica]	sko:100366369/1.1e-39/protein ITFG3-like; K17258 integrin alpha FG-GAP repeat containing protein 3	cellular_component:GO:0016021//integral component of membrane;
PIN_chr4	860000	870000	2	1	10000	-1.74516	0.221283	0.762574	Pma_10014674	843874	869043	BAK61496.1/5.7e-110/heat shock transcription factor 1a [Crassostrea gigas]	crg:105328117/3.2e-100/heat shock factor protein-like; K09414 heat shock transcription factor 1	cellular_component:GO:0042025//host cell nucleus;GO:0005634//nucleus;molecular_function:GO:0043565//sequence-specific DNA binding;GO:0003700//DNA-binding transcription factor activity;
PIN_chr3	64465000	64480000	328	2	15000	-1.88082	0.00821051	0.691883	Pma_10024704	64455689	64499272	NA	NA	NA
PIN_chr1	15595000	15605000	92	1	10000	-1.8836	-0.0117634	0.654386	Pma_10014039	15587146	15599855	XP_033743544.1/3.3e-198/methionine aminopeptidase 1-like isoform X1 [Pecten maximus]	myi:110454059/2.0e-198/methionine aminopeptidase 1-like; K01265 methionyl aminopeptidase [EC:3.4.11.18]	biological_process:GO:0070084//protein initiator methionine removal;molecular_function:GO:0046872//metal ion binding;GO:0070006//metalloaminopeptidase activity;
PIN_chr5	49530000	49540000	291	1	10000	-1.88371	-0.0122164	0.645027	Pma_52.175	49532244	49533275	NA	NA	NA
PIN_chr9	42025000	42035000	222	1	10000	-1.8853	0.0885285	0.794325	Pma_10015799	41989892	42027030	XP_022321150.1/4.9e-197/kynurenine--oxoglutarate transaminase 3-like isoform X3 [Crassostrea virginica]	crg:105327675/3.9e-197/kynurenine--oxoglutarate transaminase 3; K00816 kynurenine---oxoglutarate transaminase / cysteine-S-conjugate beta-lyase / glutamine---phenylpyruvate transaminase [EC:2.6.1.7 4.4.1.13 2.6.1.64]	biological_process:GO:0009058//biosynthetic process;molecular_function:GO:0036137//kynurenine aminotransferase activity;GO:0030170//pyridoxal phosphate binding;
PIN_chr2	28235000	28245000	152	1	10000	-1.88632	0.0509552	0.69793	Pma_10002380	28242335	28246312	NA	NA	NA
PIN_chr10	33980000	33990000	167	1	10000	-1.88638	0.133103	0.616534	Pma_10019605	33962779	33981057	XP_022333609.1/0.0e+00/uncharacterized protein LOC111130701 [Crassostrea virginica]	ptg:102971289/8.1e-16/MPDZ; multiple PDZ domain crumbs cell polarity complex component; K06095 multiple PDZ domain protein	NA
PIN_chr10	33980000	33990000	167	1	10000	-1.88638	0.133103	0.616534	Pma_10019607	33986350	34013840	XP_022306923.1/3.6e-245/phosphatidylinositol 4-phosphate 5-kinase type-1 gamma-like isoform X3 [Crassostrea virginica]	myi:110448791/2.2e-242/phosphatidylinositol 4-phosphate 5-kinase type-1 gamma-like isoform X1; K00889 1-phosphatidylinositol-4-phosphate 5-kinase [EC:2.7.1.68]	NA
PIN_chr10	355000	370000	2	2	15000	-1.88701	0.0109396	0.82428	Pma_10019260	326853	358634	XP_022336781.1/0.0e+00/poly [ADP-ribose] polymerase 14-like isoform X2 [Crassostrea virginica]	myi:110448733/2.1e-273/poly [ADP-ribose] polymerase 14-like; K15261 poly [ADP-ribose] polymerase 10/14/15 [EC:2.4.2.30]	NA
PIN_chr7	7540000	7555000	51	2	15000	-1.88824	0.045423	0.667629	Pma_10027130	7542944	7551527	XP_033725981.1/3.3e-17/fibrinogen beta chain-like isoform X2 [Pecten maximus]	bpec:110160831/8.8e-13/tenascin-like; K06252 tenascin	NA
PIN_chr3	39060000	39070000	201	1	10000	-1.8901	0.0436671	0.606195	Pma_10025367	39054590	39071034	XP_033746367.1/2.5e-190/N-fatty-acyl-amino acid synthase/hydrolase PM20D1.2-like [Pecten maximus]	myi:110466270/2.6e-190/N-fatty-acyl-amino acid synthase/hydrolase PM20D1.1-like isoform X1; K13049 carboxypeptidase PM20D1 [EC:3.4.17.-]	NA
PIN_chr11	44540000	44550000	243	1	10000	-1.89164	0.0832648	0.644632	Pma_10014689	44546709	44548910	XP_001579764.1/4.8e-09/viral A-type inclusion protein [Trichomonas vaginalis G3] >EAY18778.1 viral A-type inclusion protein, putative [Trichomonas vaginalis G3]	oro:101377405/3.0e-06/NES; nestin; K07609 nestin	NA
PIN_chr13	15820000	15830000	85	1	10000	-1.89615	0.0916006	0.769256	Pma_10012166	15816170	15867005	XP_022307034.1/0.0e+00/importin subunit beta-1-like isoform X3 [Crassostrea virginica]	crg:105317890/0.0e+00/uncharacterized protein LOC105317890; K14293 importin subunit beta-1	NA
PIN_chr3	89115000	89130000	462	2	15000	-1.89839	0.15054	0.765824	Pma_10019410	89086474	89126771	XP_022297354.1/0.0e+00/cadherin EGF LAG seven-pass G-type receptor 1-like [Crassostrea virginica]	myi:110443896/0.0e+00/cadherin EGF LAG seven-pass G-type receptor 2-like isoform X1; K04600 cadherin EGF LAG seven-pass G-type receptor 1	biological_process:GO:0007156//homophilic cell adhesion via plasma membrane adhesion molecules;GO:0007166//cell surface receptor signaling pathway;cellular_component:GO:0016021//integral component of membrane;GO:0005886//plasma membrane;molecular_function:GO:0005509//calcium ion binding;GO:0004930//G protein-coupled receptor activity;
PIN_chr11	31330000	31340000	181	1	10000	-1.90099	0.0502331	0.633649	Pma_10009344	31325722	31348299	XP_022293277.1/1.6e-90/uncharacterized protein LOC111103933 [Crassostrea virginica] >XP_022293278.1 uncharacterized protein LOC111103933 [Crassostrea virginica]	NA	NA
PIN_chr9	53860000	53875000	283	2	15000	-1.90188	0.0597806	0.651748	Pma_10002364	53863464	53865479	XP_019925115.1/8.8e-93/PREDICTED: solute carrier family 23 member 2 isoform X1 [Crassostrea gigas] >XP_019925116.1 PREDICTED: solute carrier family 23 member 2 isoform X2 [Crassostrea gigas]	myi:110464754/6.1e-89/solute carrier family 23 member 1-like; K14611 solute carrier family 23 (nucleobase transporter), member 1/2	cellular_component:GO:0016021//integral component of membrane;molecular_function:GO:0022857//transmembrane transporter activity;
PIN_chr2	7870000	7880000	45	1	10000	-1.90632	0.0158665	0.632971	Pma_10029607	7870078	7912314	XP_022332215.1/0.0e+00/neutral alpha-glucosidase AB-like isoform X2 [Crassostrea virginica]	crg:105328488/0.0e+00/neutral alpha-glucosidase AB isoform X1; K05546 mannosyl-oligosaccharide alpha-1,3-glucosidase [EC:3.2.1.207]	biological_process:GO:0005975//carbohydrate metabolic process;molecular_function:GO:0004553//hydrolase activity, hydrolyzing O-glycosyl compounds;GO:0030246//carbohydrate binding;
PIN_chr1	20110000	20120000	119	1	10000	-1.91077	0.0453275	0.650459	Pma_10020087	20075995	20119272	XP_011453732.1/2.6e-79/PREDICTED: proteasome subunit beta type-2 [Crassostrea gigas]	crg:105346718/2.4e-80/proteasome subunit beta type-2; K02734 20S proteasome subunit beta 4 [EC:3.4.25.1]	biological_process:GO:0051603//proteolysis involved in cellular protein catabolic process;cellular_component:GO:0005634//nucleus;GO:0005737//cytoplasm;GO:0005839//proteasome core complex;molecular_function:GO:0004298//threonine-type endopeptidase activity;
PIN_chr14	7600000	7610000	53	1	10000	-1.92358	0.0357577	0.614204	Pma_10022568	7592801	7600229	XP_021342710.1/8.3e-90/non-homologous end-joining factor 1-like [Mizuhopecten yessoensis] >OWF35318.1 Non-homologous end-joining factor 1 [Mizuhopecten yessoensis]	myi:110443064/7.7e-91/non-homologous end-joining factor 1-like; K10980 non-homologous end-joining factor 1	biological_process:GO:0006302//double-strand break repair;cellular_component:GO:0005634//nucleus;
PIN_chr14	7600000	7610000	53	1	10000	-1.92358	0.0357577	0.614204	Pma_10022569	7605414	7605611	XP_026481420.1/4.6e-12/putative gamma-glutamylcyclotransferase CG2811 [Ctenocephalides felis]	lak:106162528/1.3e-12/gamma-glutamylaminecyclotransferase-like isoform X1; K19761 gamma-glutamylaminecyclotransferase [EC:2.3.2.-]	molecular_function:GO:0061929//gamma-glutamylaminecyclotransferase activity;
PIN_chr14	7600000	7610000	53	1	10000	-1.92358	0.0357577	0.614204	Pma_10022570	7606279	7628274	XP_011441603.1/1.2e-121/PREDICTED: 3-hydroxyisobutyrate dehydrogenase, mitochondrial [Crassostrea gigas]	crg:105338271/1.1e-122/3-hydroxyisobutyrate dehydrogenase, mitochondrial; K00020 3-hydroxyisobutyrate dehydrogenase [EC:1.1.1.31]	biological_process:GO:0006574//valine catabolic process;molecular_function:GO:0050661//NADP binding;GO:0008442//3-hydroxyisobutyrate dehydrogenase activity;GO:0051287//NAD binding;
PIN_chr4	35230000	35240000	214	1	10000	-1.92402	0.0572221	0.682352	Pma_10019393	35227314	35244350	XP_022339526.1/6.5e-61/uncharacterized protein LOC111134623 isoform X3 [Crassostrea virginica]	epa:110238868/4.5e-17/protein-tyrosine kinase 2-beta-like; K05871 focal adhesion kinase 2 [EC:2.7.10.2]	NA
PIN_chr10	32340000	32350000	158	1	10000	-1.9294	0.0604249	0.614904	Pma_10020485	32330242	32341781	XP_021349787.1/3.8e-90/activating signal cointegrator 1 complex subunit 1-like [Mizuhopecten yessoensis] >XP_021349788.1 activating signal cointegrator 1 complex subunit 1-like [Mizuhopecten yessoensis] >XP_021349789.1 activating signal cointegrator 1 complex subunit 1-like [Mizuhopecten yessoensis] >XP_021349790.1 activating signal cointegrator 1 complex subunit 1-like [Mizuhopecten yessoensis] …	myi:110448075/3.5e-91/activating signal cointegrator 1 complex subunit 1-like; K18666 activating signal cointegrator complex subunit 1	molecular_function:GO:0003723//RNA binding;
PIN_chr11	32935000	32945000	187	1	10000	-1.93934	0.0200899	0.638852	Pma_10007984	32899648	32946254	RZF36559.1/7.0e-67/hypothetical protein LSTR_LSTR010670 [Laodelphax striatellus]	bmor:101736072/1.5e-56/RNA-binding protein cabeza-like; K13098 RNA-binding protein FUS	biological_process:GO:0006355//regulation of transcription, DNA-templated;molecular_function:GO:0003723//RNA binding;GO:0046872//metal ion binding;
PIN_chr11	32935000	32945000	187	1	10000	-1.93934	0.0200899	0.638852	Pma_10007985	32934421	32936975	XP_011442898.1/3.5e-23/PREDICTED: heavy metal-binding protein HIP-like isoform X2 [Crassostrea gigas] >XP_019927318.1 PREDICTED: heavy metal-binding protein HIP-like isoform X1 [Crassostrea gigas]	npr:108799169/3.6e-07/adiponectin-like; K07296 adiponectin	NA
PIN_chr6	2255000	2265000	15	1	10000	-1.93981	0.0478827	0.62045	Pma_10007855	2261267	2261692	OCT94095.1/2.8e-22/hypothetical protein XELAEV_18011759mg [Xenopus laevis]	gga:395890/3.6e-17/NES; nestin; K07609 nestin	cellular_component:GO:0016021//integral component of membrane;
PIN_chr4	2285000	2305000	14	3	20000	-1.95454	0.037131	0.694574	Pma_10003482	2263063	2288618	AIW04139.1/3.0e-54/foot protein 1 [Atrina pectinata]	spis:111323534/1.5e-13/uncharacterized protein LOC111323534; K06560 mannose receptor, C type	NA
PIN_chr4	2285000	2305000	14	3	20000	-1.95454	0.037131	0.694574	Pma_10003483	2294815	2296390	XP_011422292.1/1.2e-15/PREDICTED: uncharacterized protein LOC105324804 [Crassostrea gigas]	lak:106170633/9.2e-14/CD109 antigen-like; K06530 CD109 antigen	NA
PIN_chr10	72255000	72265000	365	1	10000	-1.88045	0.212578	0.806914	Pma_10015240	72254241	72305344	XP_033733642.1/3.4e-43/uncharacterized protein PF11_0213-like [Pecten maximus]	pvt:110080166/4.3e-33/GPC4; glypican-4; K08110 glypican 4	NA
PIN_chr3	72470000	72485000	381	2	15000	-1.97504	0.118809	0.71505	Pma_10012670	72447237	72474108	XP_011427499.1/9.5e-252/PREDICTED: RUN domain-containing protein 1 [Crassostrea gigas] >XP_011427500.1 PREDICTED: RUN domain-containing protein 1 [Crassostrea gigas]	crg:105331801/3.3e-58/neuronal acetylcholine receptor subunit alpha-6; K04808 nicotinic acetylcholine receptor alpha-6	NA
PIN_chr9	77770000	77780000	404	1	10000	-1.97719	-0.0218556	0.672839	Pma_10021037	77773460	77799035	XP_011439713.1/7.0e-254/PREDICTED: splicing factor 3A subunit 3 [Crassostrea gigas]	crg:105336920/6.5e-255/splicing factor 3A subunit 3; K12827 splicing factor 3A subunit 3	biological_process:GO:0000398//mRNA splicing, via spliceosome;cellular_component:GO:0005681//spliceosomal complex;molecular_function:GO:0003723//RNA binding;GO:0008270//zinc ion binding;
PIN_chr14	43760000	43770000	250	1	10000	-1.97873	0.00114432	0.81878	Pma_10013518	43768473	43777780	XP_011430986.1/4.5e-17/PREDICTED: uncharacterized protein LOC105330779 [Crassostrea gigas]	hsa:114904/1.7e-08/C1QTNF6, CTFP6, CTRP6, ZACRP6; C1q and TNF related 6; K19470 complement C1q tumor necrosis factor-related protein 6	NA
PIN_chr2	41895000	41910000	230	2	15000	-1.99115	0.0254452	0.687444	Pma_10010943	41889860	41906319	ALK82317.1/0.0e+00/TSP1-containing protein [Pinctada fucata]	mmu:107656/5.2e-37/Krt9, EPPK, K9, Krt1-9; keratin 9; K07604 type I keratin, acidic	NA
PIN_chr3	65380000	65395000	335	2	15000	-1.99615	0.0426752	0.648509	Pma_10007562	65387373	65391388	XP_021345206.1/0.0e+00/uncharacterized protein LOC110445119 [Mizuhopecten yessoensis]	hmg:100215633/2.7e-34/nbas; neuroblastoma-amplified sequence; K20473 neuroblastoma-amplified sequence	NA
PIN_chr10	23260000	23270000	114	1	10000	-2.00237	0.0523093	0.691295	Pma_10008117	23241236	23339500	XP_011428049.1/1.6e-166/PREDICTED: PHD finger protein 20-like protein 1 isoform X3 [Crassostrea gigas]	crg:105328744/1.4e-165/PHD finger protein 20-like protein 1 isoform X1; K18402 PHD finger protein 20	NA
PIN_chr4	10555000	10570000	62	2	15000	-2.00357	0.0206679	0.722207	Pma_10025442	10560449	10579666	XP_011428934.1/0.0e+00/PREDICTED: calcium-transporting ATPase type 2C member 1 isoform X1 [Crassostrea gigas]	crg:105329397/0.0e+00/calcium-transporting ATPase type 2C member 1 isoform X1; K01537 Ca2+-transporting ATPase [EC:3.6.3.8]	NA
PIN_chr5	5995000	6005000	37	1	10000	-2.00648	0.0424309	0.602268	Pma_10012169	5994584	6006211	XP_032670032.1/1.5e-17/LOW QUALITY PROTEIN: serine-rich adhesin for platelets-like [Odontomachus brunneus]	epa:110237484/1.4e-15/collagen alpha-1(I) chain-like; K19720 collagen, type III, alpha	molecular_function:GO:0042302//structural constituent of cuticle;
PIN_chr3	41460000	41470000	219	1	10000	-2.00874	0.0734048	0.644281	Pma_10004805	41468892	41470148	XP_020624985.1/8.3e-06/uncharacterized protein LOC110062426 [Orbicella faveolata]	NA	NA
PIN_chr5	10010000	10020000	60	1	10000	-2.03837	0.0594704	0.607983	Pma_10002717	10019828	10021151	XP_033749098.1/3.0e-32/calmodulin-like [Pecten maximus]	crg:105338364/1.3e-30/calmodulin-1-like; K02183 calmodulin	molecular_function:GO:0005509//calcium ion binding;
PIN_chr5	10010000	10020000	60	1	10000	-2.03837	0.0594704	0.607983	Pma_10002718	10006769	10013976	XP_022308818.1/6.0e-29/tetratricopeptide repeat protein 39C-like [Crassostrea virginica]	NA	NA
PIN_chr3	52360000	52375000	278	2	15000	-2.0509	0.0369462	0.667897	Pma_10021700	52373399	52383093	XP_033753630.1/2.7e-22/DNA damage-regulated autophagy modulator protein 2-like [Pecten maximus]	crg:105336809/2.0e-20/transmembrane protein 150B-A isoform X1; K21956 DNA damage-regulated autophagy modulator protein 2	NA
PIN_chr10	20360000	20375000	93	2	15000	-2.05137	0.0591365	0.819945	Pma_10010390	20370272	20427296	XP_022288771.1/8.5e-186/cytosolic purine 5'-nucleotidase-like isoform X3 [Crassostrea virginica]	crg:105325061/1.2e-182/cytosolic purine 5'-nucleotidase isoform X1; K01081 5'-nucleotidase [EC:3.1.3.5]	NA
PIN_chr1	3805000	3815000	20	1	10000	-2.06997	0.0344504	0.630993	Pma_10006734	3814194	3815303	XP_022314706.1/7.7e-80/uncharacterized protein LOC111119143 [Crassostrea virginica] >XP_022314707.1 uncharacterized protein LOC111119143 [Crassostrea virginica] >XP_022314708.1 uncharacterized protein LOC111119143 [Crassostrea virginica]	NA	cellular_component:GO:0016021//integral component of membrane;
PIN_chr1	3805000	3815000	20	1	10000	-2.06997	0.0344504	0.630993	Pma_10006735	3811254	3812747	ROT82721.1/9.7e-46/hypothetical protein C7M84_024117 [Penaeus vannamei]	myi:110447873/6.8e-26/trichohyalin-like; K18626 trichohyalin	NA
PIN_chr11	46225000	46240000	255	2	15000	-2.07997	0.0530772	0.606815	Pma_10030955	46188085	46234914	XP_016795527.2/3.4e-173/2-hydroxyacyl-CoA lyase 1 isoform X4 [Pan troglodytes]	crg:105325181/4.2e-174/2-hydroxyacyl-CoA lyase 1-like; K12261 2-hydroxyacyl-CoA lyase 1 [EC:4.1.-.-]	NA
PIN_chr6	50865000	50880000	249	2	15000	-1.74261	0.279553	0.647463	Pma_10016932	50863805	50871931	XP_005093276.1/6.2e-34/PREDICTED: cytochrome c oxidase subunit 4 isoform 1, mitochondrial-like [Aplysia californica] >XP_005093277.1 PREDICTED: cytochrome c oxidase subunit 4 isoform 1, mitochondrial-like [Aplysia californica] >XP_005093278.1 PREDICTED: cytochrome c oxidase subunit 4 isoform 1, mitochondrial-like [Aplysia californica]	clec:106669321/1.9e-30/cytochrome c oxidase subunit 4 isoform 1, mitochondrial-like; K02263 cytochrome c oxidase subunit 4	biological_process:GO:0006123//mitochondrial electron transport, cytochrome c to oxygen;cellular_component:GO:0016021//integral component of membrane;GO:0005751//mitochondrial respiratory chain complex IV;molecular_function:GO:0004129//cytochrome-c oxidase activity;
PIN_chr3	29190000	29200000	153	1	10000	-2.1384	-0.00319604	0.612047	Pma_10008714	29155276	29195845	XP_011440893.1/1.9e-54/PREDICTED: ataxin-10 [Crassostrea gigas]	crg:105337728/1.7e-55/ataxin-10; K19323 ataxin-10	NA
PIN_chr1	82695000	82705000	423	1	10000	-2.16884	0.0697533	0.607498	Pma_10026597	82703679	82710978	XP_022346085.1/0.0e+00/intraflagellar transport protein 80 homolog isoform X2 [Crassostrea virginica]	crg:105338633/0.0e+00/intraflagellar transport protein 80 homolog isoform X1; K19678 intraflagellar transport protein 80	NA
PIN_chr1	82695000	82705000	423	1	10000	-2.16884	0.0697533	0.607498	Pma_10026598	82696903	82698180	XP_019927358.1/5.3e-109/PREDICTED: uncharacterized protein LOC109620118 [Crassostrea gigas]	crg:105328772/4.6e-108/uncharacterized protein LOC105328772; K15456 protein KTI12	molecular_function:GO:0008270//zinc ion binding;GO:0003676//nucleic acid binding;
PIN_chr1	82695000	82705000	423	1	10000	-2.16884	0.0697533	0.607498	Pma_10026599	82694612	82696271	XP_011422798.1/1.8e-129/PREDICTED: uncharacterized protein LOC105325112 isoform X1 [Crassostrea gigas]	acun:113477503/4.4e-70/uncharacterized protein LOC113477503; K09228 KRAB domain-containing zinc finger protein	NA
PIN_chr1	85670000	85680000	436	1	10000	-2.18291	0.0538833	0.605642	Pma_10030273	85670378	85678381	XP_021379572.1/1.3e-120/Golgi to ER traffic protein 4 homolog [Mizuhopecten yessoensis] >OWF37815.1 Golgi to ER traffic protein 4-like [Mizuhopecten yessoensis]	NA	biological_process:GO:0045048//protein insertion into ER membrane;
PIN_chr14	28530000	28540000	170	1	10000	-2.22841	0.0397672	0.624181	Pma_10032006	28527293	28534876	KAF0750722.1/6.2e-19/YqaJ domain-containing protein, partial [Aphis craccivora]	NA	NA
PIN_chr7	37485000	37495000	223	1	10000	-2.25648	0.0562643	0.72302	Pma_10028499	37487042	37508352	XP_022306852.1/3.6e-195/receptor-type tyrosine-protein phosphatase N2-like [Crassostrea virginica]	crg:105342881/7.4e-196/receptor-type tyrosine-protein phosphatase N2; K07817 receptor-type tyrosine-protein phosphatase N [EC:3.1.3.48]	cellular_component:GO:0016021//integral component of membrane;molecular_function:GO:0004725//protein tyrosine phosphatase activity;
PIN_chr2	39440000	39450000	193	1	10000	-1.97233	0.18418	0.680706	Pma_10016945	39443365	39444228	XP_011422014.1/3.1e-36/PREDICTED: acyl-CoA synthetase family member 2, mitochondrial [Crassostrea gigas] >XP_011422021.1 PREDICTED: acyl-CoA synthetase family member 2, mitochondrial [Crassostrea gigas]	myi:110449250/2.2e-21/uncharacterized protein LOC110449250; K00666 fatty-acyl-CoA synthase [EC:6.2.1.-]	molecular_function:GO:0003824//catalytic activity;
PIN_chr2	39440000	39450000	193	1	10000	-1.97233	0.18418	0.680706	Pma_10016946	39440905	39441681	XP_022321945.1/8.4e-41/long-chain-fatty-acid--[acyl-carrier-protein] ligase AEE15, chloroplastic-like [Crassostrea virginica]	crg:105344024/4.6e-26/acyl-CoA synthetase family member 2, mitochondrial; K00666 fatty-acyl-CoA synthase [EC:6.2.1.-]	NA
PIN_chr11	25195000	25210000	128	2	15000	-1.38823	0.160879	0.569731	Pma_10007417	25197972	25199984	XP_022297483.1/3.4e-70/uncharacterized protein LOC111106895 [Crassostrea virginica]	crg:109618359/7.6e-57/uncharacterized protein LOC109618359; K12026 tripartite motif-containing protein 56 [EC:2.3.2.27]	NA
PIN_chr11	25195000	25210000	128	2	15000	-1.38823	0.160879	0.569731	Pma_10007416	25202183	25213661	XP_021366217.1/6.9e-42/probable E3 ubiquitin-protein ligase TRIM8 [Mizuhopecten yessoensis] >OWF44193.1 E3 ubiquitin-protein ligase TRIM33 [Mizuhopecten yessoensis]	crg:109621067/6.7e-32/E3 ubiquitin-protein ligase Midline-1-like; K08285 midline 1 [EC:2.3.2.27]	molecular_function:GO:0046872//metal ion binding;GO:0008270//zinc ion binding;
PIN_chr5	34915000	34925000	179	1	10000	-1.59143	0.267469	0.623023	Pma_10019712	34904260	34945664	XP_023930594.1/9.2e-92/fibropellin-1-like [Lingula anatina]	lak:106166764/8.5e-93/fibropellin-1-like; K02599 Notch 1	cellular_component:GO:0016021//integral component of membrane;molecular_function:GO:0005509//calcium ion binding;GO:0016491//oxidoreductase activity;
PIN_chr1	27910000	27920000	128	1	10000	-1.39921	0.177107	0.541866	Pma_348.67	27918431	27919720	NA	NA	NA
PIN_chr1	69695000	69705000	332	1	10000	-1.40971	0.282449	0.586647	Pma_10024817	69669016	69696008	XP_011448970.1/1.3e-149/PREDICTED: beta-lactamase domain-containing protein 2 [Crassostrea gigas]	crg:105338286/5.0e-83/ras association domain-containing protein 2 isoform X1; K09851 Ras association domain-containing protein 2/4	NA
PIN_chr1	69695000	69705000	332	1	10000	-1.40971	0.282449	0.586647	Pma_10024816	69696605	69715905	XP_022316912.1/1.1e-79/ras association domain-containing protein 2-like isoform X1 [Crassostrea virginica]	crg:105338286/1.0e-72/ras association domain-containing protein 2 isoform X1; K09851 Ras association domain-containing protein 2/4	biological_process:GO:0007165//signal transduction;molecular_function:GO:0046872//metal ion binding;
PIN_chr1	28210000	28220000	130	1	10000	-2.10707	0.212441	0.765159	Pma_10020095	28219052	28228268	NA	NA	NA
PIN_chr2	55445000	55455000	259	1	10000	-1.42553	0.207521	0.164946	Pma_10029481	55442161	55461451	XP_019919569.1/4.5e-84/PREDICTED: protein YIF1B-B isoform X3 [Crassostrea gigas]	crg:105320099/1.6e-84/protein YIF1B-B isoform X2; K20362 protein transport protein YIF1	biological_process:GO:0006888//endoplasmic reticulum to Golgi vesicle-mediated transport;cellular_component:GO:0016021//integral component of membrane;GO:0005789//endoplasmic reticulum membrane;
PIN_chr8	9615000	9630000	44	2	15000	-1.42686	0.220333	0.417381	Pma_10014334	9618255	9626364	XP_011411910.1/1.2e-56/PREDICTED: uncharacterized protein LOC105317072 [Crassostrea gigas]	NA	NA
PIN_chr14	6360000	6370000	28	1	10000	-1.43179	0.181082	0.329612	Pma_300.353	6362005	6373378	NA	NA	NA
PIN_chr4	43295000	43310000	208	2	15000	-1.43187	0.186282	0.565814	Pma_10025744	43300155	43304415	XP_024509243.1/2.3e-38/Collagen alpha-1(IV) chain [Strongyloides ratti] >CEF70044.1 Collagen alpha-1(IV) chain [Strongyloides ratti]	tsp:Tsp_04066/7.0e-38/collagen alpha-2(IV) chain; K06237 collagen, type IV, alpha	biological_process:GO:1903354//regulation of distal tip cell migration;GO:0009792//embryo development ending in birth or egg hatching;GO:0035262//gonad morphogenesis;GO:0008104//protein localization;cellular_component:GO:0005587//collagen type IV trimer;GO:0005581//collagen trimer;molecular_function:GO:0042302//structural constituent of cuticle;GO:0005201//extracellular matrix structural constitu…
PIN_chr11	47590000	47600000	252	1	10000	-1.43776	0.166494	0.550261	Pma_10018665	47589725	47608586	XP_033747604.1/8.0e-231/FACT complex subunit SSRP1-like [Pecten maximus]	crg:105321509/8.0e-194/FACT complex subunit SSRP1-like; K09272 structure-specific recognition protein 1	biological_process:GO:0006281//DNA repair;GO:0006260//DNA replication;cellular_component:GO:0005634//nucleus;GO:0005694//chromosome;molecular_function:GO:0003677//DNA binding;
PIN_chr1	36595000	36610000	175	2	15000	-1.48624	0.181261	0.880609	Pma_10020145	36577968	36658840	XP_022317233.1/5.6e-263/LOW QUALITY PROTEIN: uncharacterized protein LOC111120650 [Crassostrea virginica]	sko:100366973/5.2e-123/uncharacterized LOC100366973; K02599 Notch 1	cellular_component:GO:0016021//integral component of membrane;molecular_function:GO:0005509//calcium ion binding;
PIN_chr9	97730000	97740000	470	1	10000	-1.43836	0.210551	0.729995	Pma_10020271	97725327	97741047	XP_011438374.1/0.0e+00/PREDICTED: leucine-zipper-like transcriptional regulator 1 [Crassostrea gigas]	bacu:103020028/2.3e-139/AIFM3; apoptosis-inducing factor, mitochondrion-associated, 3; K22747 apoptosis-inducing factor 3	NA
PIN_chr14	22715000	22730000	106	2	15000	-1.44988	0.1625	0.115555	Pma_10005203	22723067	22743300	XP_011453862.1/6.3e-13/PREDICTED: small nuclear ribonucleoprotein G-like [Crassostrea gigas] >AEF33399.1 small nuclear ribonucleoprotein polypeptide G protein [Crassostrea ariakensis]	crg:105346836/5.9e-14/small nuclear ribonucleoprotein G-like; K11099 small nuclear ribonucleoprotein G	biological_process:GO:0000387//spliceosomal snRNP assembly;cellular_component:GO:0005681//spliceosomal complex;molecular_function:GO:0003723//RNA binding;
PIN_chr10	13620000	13635000	63	2	15000	-1.45365	0.827204	0.242911	Pma_10004838	13617002	13620313	XP_019927985.1/1.5e-110/PREDICTED: uncharacterized protein LOC105340841 [Crassostrea gigas]	NA	NA
PIN_chr10	13620000	13635000	63	2	15000	-1.45365	0.827204	0.242911	Pma_10004839	13626141	13626776	XP_022311927.1/9.2e-46/uncharacterized protein LOC111117138 [Crassostrea virginica]	nve:NEMVE_v1g238950/1.8e-12/hypothetical protein ; K19025 AP-5 complex subunit zeta-1	NA
PIN_chr4	44405000	44415000	210	1	10000	-1.45536	0.179872	0.425481	Pma_444.481	44400327	44407929	NA	NA	NA
PIN_chr2	47435000	47450000	227	2	15000	-1.46847	0.178599	0.476655	Pma_10018205	47445292	47446160	NA	NA	NA
PIN_chr3	68590000	68615000	316	3	25000	-1.46926	0.18537	0.570254	Pma_10028025	68614342	68635636	XP_022301487.1/2.7e-176/glutarate-semialdehyde dehydrogenase DavD-like isoform X1 [Crassostrea virginica]	crg:105346453/2.2e-176/glutarate-semialdehyde dehydrogenase DavD isoform X3; K00139 succinate-semialdehyde dehydrogenase [EC:1.2.1.24]	NA
PIN_chr3	68590000	68615000	316	3	25000	-1.46926	0.18537	0.570254	Pma_10028026	68592908	68598230	XP_022301426.1/3.0e-259/uncharacterized protein LOC111109549 [Crassostrea virginica]	bfo:BRAFLDRAFT_71735/2.5e-51/hypothetical protein; K09228 KRAB domain-containing zinc finger protein	biological_process:GO:0032259//methylation;molecular_function:GO:0008168//methyltransferase activity;GO:0003676//nucleic acid binding;
PIN_chr5	9875000	9885000	58	1	10000	-1.71501	0.184058	0.811953	Pma_10020700	9881035	9883472	NA	NA	NA
PIN_chr6	35350000	35365000	164	2	15000	-1.48413	0.175287	0.889921	Pma_10013257	35355838	35362894	XP_011424843.1/3.4e-66/PREDICTED: DNA fragmentation factor subunit alpha [Crassostrea gigas]	crg:105326479/3.2e-67/DNA fragmentation factor subunit alpha; K02310 DNA fragmentation factor, 45 kD, alpha subunit	biological_process:GO:0006915//apoptotic process;
PIN_chr4	51890000	51900000	259	1	10000	-1.48486	0.22308	0.898528	Pma_10022914	51887475	51895080	XP_022327062.1/3.0e-90/lachesin-like [Crassostrea virginica] >XP_022327304.1 lachesin-like [Crassostrea virginica]	crg:105345755/6.2e-91/lachesin-like; K06772 limbic system-associated membrane protein	cellular_component:GO:0016021//integral component of membrane;molecular_function:GO:0030246//carbohydrate binding;
PIN_chr6	43400000	43410000	206	1	10000	-1.38232	0.174575	0.628334	Pma_10022042	43402712	43431201	XP_021373560.1/8.7e-181/cytochrome P450 20A1-like [Mizuhopecten yessoensis] >OWF40771.1 Cytochrome P450 20A1 [Mizuhopecten yessoensis]	myi:110463360/8.1e-182/cytochrome P450 20A1-like; K07435 cytochrome P450 family 20 subfamily A	molecular_function:GO:0016705//oxidoreductase activity, acting on paired donors, with incorporation or reduction of molecular oxygen;GO:0020037//heme binding;GO:0005506//iron ion binding;
PIN_chr2	5940000	5950000	40	1	10000	-1.60763	0.170132	0.731401	Pma_10023365	5939430	5952103	NA	NA	NA
PIN_chr7	17450000	17460000	92	1	10000	-1.53208	0.155715	0.712441	Pma_10022283	17447735	17460666	NA	NA	NA
PIN_chr13	15280000	15290000	67	1	10000	-1.48204	0.319112	0.893097	Pma_10025061	15266669	15285946	XP_011427363.1/0.0e+00/PREDICTED: uncharacterized protein LOC105328274 isoform X1 [Crassostrea gigas]	crg:105328274/0.0e+00/uncharacterized protein LOC105328274 isoform X1; K08701 nuclear receptor subfamily 1 group D member 3	cellular_component:GO:0042025//host cell nucleus;GO:0005634//nucleus;molecular_function:GO:0003707//steroid hormone receptor activity;GO:0008270//zinc ion binding;GO:0043565//sequence-specific DNA binding;GO:0004879//nuclear receptor activity;
PIN_chr10	8720000	8730000	44	1	10000	-1.54993	0.187274	0.476727	Pma_10007827	8726013	8733534	XP_011420214.1/7.9e-115/PREDICTED: AMME syndrome candidate gene 1 protein [Crassostrea gigas]	NA	NA
PIN_chr7	24900000	24910000	130	1	10000	-1.55351	0.164781	0.275559	Pma_10007429	24899207	24930631	NA	NA	NA
PIN_chr10	50020000	50030000	252	1	10000	-1.55664	0.176633	0.563688	Pma_10026842	49991978	50043171	GBM37282.1/9.5e-196/Transposon Ty3-I Gag-Pol polyprotein [Araneus ventricosus]	xma:102225078/1.9e-106/uncharacterized protein LOC102225078; K06065 nuclear receptor co-repressor 2	biological_process:GO:0015074//DNA integration;molecular_function:GO:0008270//zinc ion binding;GO:0004190//aspartic-type endopeptidase activity;GO:0003676//nucleic acid binding;
PIN_chr3	48760000	48770000	221	1	10000	-1.58028	0.332043	0.377268	Pma_10015248	48758303	48766607	XP_022299533.1/2.3e-59/zinc finger and BTB domain-containing protein 49-like isoform X2 [Crassostrea virginica]	tnl:113506485/9.3e-11/zinc finger protein SNAI2-like; K09219 scratch	NA
PIN_chr5	410000	420000	4	1	10000	-1.58804	0.19188	0.357556	Pma_267.174	413908	415127	NA	NA	NA
PIN_chr9	50110000	50120000	226	1	10000	-1.59143	0.160717	0.531309	Pma_10030543	50111383	50111586	XP_019928178.1/2.3e-06/PREDICTED: complement C1q tumor necrosis factor-related protein 5-like isoform X2 [Crassostrea gigas]	NA	NA
PIN_chr10	27265000	27280000	143	2	15000	-1.48624	0.164253	0.850554	Pma_10026654	27245385	27271081	XP_022340645.1/0.0e+00/transient receptor potential cation channel trpm-like isoform X4 [Crassostrea virginica]	myi:110466308/1.9e-306/transient receptor potential cation channel subfamily M member 1-like isoform X1; K04978 transient receptor potential cation channel subfamily M member 3	NA
PIN_chr10	26260000	26275000	139	2	15000	-1.61	0.237484	0.668426	Pma_10029836	26148915	26287254	XP_022303820.1/0.0e+00/uncharacterized protein LOC111111251 [Crassostrea virginica]	acep:105627643/0.0e+00/aminopeptidase N; K11140 aminopeptidase N [EC:3.4.11.2]	cellular_component:GO:0016021//integral component of membrane;molecular_function:GO:0008237//metallopeptidase activity;GO:0004177//aminopeptidase activity;GO:0008270//zinc ion binding;
PIN_chr9	12410000	12425000	52	2	15000	-1.61928	0.353128	0.455589	Pma_102.152	12411899	12412495	NA	NA	NA
PIN_chr1	82595000	82605000	386	1	10000	-1.62054	0.162926	0.43741	Pma_10004901	82587924	82601626	XP_022315407.1/0.0e+00/ubiquitin carboxyl-terminal hydrolase 24-like [Crassostrea virginica]	myi:110441515/0.0e+00/ubiquitin carboxyl-terminal hydrolase 24-like; K11840 ubiquitin carboxyl-terminal hydrolase 9/24 [EC:3.4.19.12]	NA
PIN_chr9	27380000	27395000	125	2	15000	-1.62771	0.259188	0.531824	Pma_10012110	27388059	27399428	XP_032876346.1/4.3e-26/LOW QUALITY PROTEIN: basic proline-rich protein-like, partial [Amblyraja radiata]	sko:102805191/5.4e-24/formin-1-like; K02184 formin 2	NA
PIN_chr9	27380000	27395000	125	2	15000	-1.62771	0.259188	0.531824	Pma_10012111	27381456	27384441	XP_013393068.1/4.8e-47/serine beta-lactamase-like protein LACTB, mitochondrial [Lingula anatina]	lak:106160847/4.5e-48/serine beta-lactamase-like protein LACTB, mitochondrial; K17382 serine beta-lactamase-like protein LACTB, mitochondrial	NA
PIN_chr9	27380000	27395000	125	2	15000	-1.62771	0.259188	0.531824	Pma_10012112	27379657	27381391	XP_033735112.1/1.5e-60/uncharacterized protein LOC117323783 isoform X1 [Pecten maximus]	NA	NA
PIN_chr5	17540000	17550000	98	1	10000	-1.62994	0.337607	0.512582	Pma_382.893	17549592	17551139	NA	NA	NA
PIN_chr14	4410000	4420000	20	1	10000	-1.64936	0.16794	0.425015	Pma_10020865	4410598	4410804	XP_011426631.1/7.7e-26/PREDICTED: programmed cell death 6-interacting protein isoform X2 [Crassostrea gigas]	myi:110452747/7.2e-27/programmed cell death 6-interacting protein-like isoform X1; K12200 programmed cell death 6-interacting protein	NA
PIN_chr4	29870000	29880000	151	1	10000	-1.59947	0.18573	0.631406	Pma_10027362	29875612	29877396	XP_011415424.1/3.8e-73/PREDICTED: uncharacterized protein LOC105319534 [Crassostrea gigas]	NA	NA
PIN_chr6	2960000	2970000	14	1	10000	-1.67577	0.202372	0.572965	Pma_10014453	2944887	2975705	XP_011448984.1/0.0e+00/PREDICTED: cilia- and flagella-associated protein 74 isoform X2 [Crassostrea gigas]	kmr:108232630/4.9e-22/trichohyalin-like; K12484 Rab11 family-interacting protein 1/2/5	NA
PIN_chr8	13595000	13610000	69	2	15000	-1.42513	0.202383	0.630019	Pma_10027964	13605259	13610530	XP_018915028.1/3.7e-22/PREDICTED: transcriptional regulator ATRX homolog [Bemisia tabaci]	kmr:108239012/1.8e-11/histone-lysine N-methyltransferase SETDB1-A-like; K11421 histone-lysine N-methyltransferase SETDB1 [EC:2.1.1.43]	NA
PIN_chr3	49540000	49550000	224	1	10000	-1.69267	0.197998	0.548182	Pma_10028927	49542872	49545936	XP_011437900.1/2.8e-51/PREDICTED: enoyl-CoA delta isomerase 2, peroxisomal [Crassostrea gigas]	myi:110463380/1.7e-48/enoyl-CoA delta isomerase 2, peroxisomal-like; K07517 Delta3-Delta2-enoyl-CoA isomerase [EC:5.3.3.8]	molecular_function:GO:0016853//isomerase activity;GO:0003824//catalytic activity;
PIN_chr7	33240000	33270000	175	4	30000	-1.37884	0.163873	0.726721	Pma_10028353	33263712	33264431	XP_022288652.1/1.2e-33/uncharacterized protein LOC111100820 [Crassostrea virginica] >XP_022288653.1 uncharacterized protein LOC111100820 [Crassostrea virginica] >XP_022288654.1 uncharacterized protein LOC111100820 [Crassostrea virginica]	myi:110441217/1.0e-27/uncharacterized protein LOC110441217; K17834 cyclic GMP-AMP synthase [EC:2.7.7.86]	NA
PIN_chr7	33240000	33270000	175	4	30000	-1.37884	0.163873	0.726721	Pma_10028354	33264487	33265677	XP_022309959.1/5.2e-26/uncharacterized protein LOC111115494 [Crassostrea virginica]	myi:110461159/1.6e-06/uncharacterized protein LOC110461159; K17834 cyclic GMP-AMP synthase [EC:2.7.7.86]	NA
PIN_chr9	84765000	84780000	408	2	15000	-1.67351	0.203438	0.451008	Pma_10030066	84774091	84774834	OWF40980.1/4.1e-21/hypothetical protein KP79_PYT16008 [Mizuhopecten yessoensis]	NA	NA
PIN_chr6	32125000	32135000	148	1	10000	-1.74852	0.162802	-0.0343875	Pma_10025530	32133544	32134092	NA	NA	NA
PIN_chr6	32125000	32135000	148	1	10000	-1.74852	0.162802	-0.0343875	Pma_10025531	32123722	32133158	XP_022311722.1/1.3e-231/uncharacterized protein LOC111116960 isoform X1 [Crassostrea virginica]	NA	NA
PIN_chr4	26905000	26920000	133	2	15000	-1.7527	0.184713	-0.0640562	Pma_10015388	26901057	26933701	XP_011430382.1/5.9e-200/PREDICTED: uncharacterized protein LOC105330416 isoform X1 [Crassostrea gigas]	pdam:113681230/1.3e-40/uncharacterized protein LOC113681230; K10955 mucin-2	NA
PIN_chr5	26735000	26750000	137	2	15000	-1.79341	0.291195	0.456913	Pma_10013729	26738261	26738872	OWF55040.1/2.5e-24/hypothetical protein KP79_PYT17022 [Mizuhopecten yessoensis]	ipu:108273809/1.9e-11/C-type lectin domain family 4 member M-like; K10060 C-type lectin domain family 4 member F	cellular_component:GO:0016021//integral component of membrane;
PIN_chr5	26735000	26750000	137	2	15000	-1.79341	0.291195	0.456913	Pma_10013728	26737219	26737545	XP_022294893.1/1.6e-09/cerebellin-1-like [Crassostrea virginica]	NA	NA
PIN_chr2	11675000	11685000	71	1	10000	-1.80361	0.153509	0.409244	Pma_10010353	11652434	11678771	XP_022330242.1/2.1e-147/uncharacterized protein LOC111128728 [Crassostrea virginica]	myi:110456916/2.3e-141/uncharacterized protein LOC110456916; K05094 fibroblast growth factor receptor 3 [EC:2.7.10.1]	NA
PIN_chr4	20025000	20035000	102	1	10000	-1.44838	0.201605	0.654249	Pma_10031283	20009353	20025840	XP_022337655.1/2.9e-59/short-chain collagen C4-like [Crassostrea virginica]	bfo:BRAFLDRAFT_129974/2.9e-30/hypothetical protein; K03989 complement component 4	NA
PIN_chr4	20025000	20035000	102	1	10000	-1.44838	0.201605	0.654249	Pma_10031284	20032461	20046615	XP_022246959.1/6.0e-147/protein retinal degeneration B-like isoform X2 [Limulus polyphemus]	egl:EGR_00902/1.8e-61/Calpain-7; K08576 calpain-7 [EC:3.4.22.-]	molecular_function:GO:0046872//metal ion binding;GO:0005548//phospholipid transporter activity;
PIN_chr5	42020000	42030000	212	1	10000	-1.99993	0.1715	0.684088	Pma_10008261	42015990	42021220	XP_033726501.1/3.4e-42/histone-lysine N-methyltransferase SETD1A-like [Pecten maximus]	spis:111324567/7.4e-08/LOW QUALITY PROTEIN: collagen alpha-1(I) chain-like; K06237 collagen, type IV, alpha	NA
PIN_chr5	42020000	42030000	212	1	10000	-1.99993	0.1715	0.684088	Pma_10008262	42021534	42023566	XP_029716478.1/9.4e-40/mucin-19-like [Aedes albopictus]	aga:AgaP_AGAP004734/3.5e-34/AGAP004734-PA; K04650 nuclear receptor co-repressor 1	biological_process:GO:0006032//chitin catabolic process;GO:0006412//translation;cellular_component:GO:0005840//ribosome;GO:0005737//cytoplasm;GO:0005576//extracellular region;GO:0016021//integral component of membrane;molecular_function:GO:0008061//chitin binding;GO:0004568//chitinase activity;GO:0003735//structural constituent of ribosome;
PIN_chr3	18690000	18705000	95	2	15000	-2.01794	0.212241	-0.251133	Pma_10009691	18683524	18720017	XP_011451590.1/0.0e+00/PREDICTED: apoptosis-resistant E3 ubiquitin protein ligase 1 isoform X1 [Crassostrea gigas]	crg:105345209/0.0e+00/apoptosis-resistant E3 ubiquitin protein ligase 1 isoform X1; K22370 apoptosis-resistant E3 ubiquitin protein ligase 1 [EC:2.3.2.26]	cellular_component:GO:0016021//integral component of membrane;molecular_function:GO:0004842//ubiquitin-protein transferase activity;
PIN_chr9	1055000	1070000	6	2	15000	-1.69759	0.195559	0.774614	Pma_311.674	988380	1069676	NA	NA	NA

## Sheet: Table S4
Table S4. The accession information of RAD-seq data in the present study
accession	study	object_status	bioproject_accession	biosample_accession	library_ID	title	library_strategy	library_source	library_selection	library_layout	platform	instrument_model	filetype	filename	filename2
SRR22243933	SRP406971	new	PRJNA896368	SAMN31543685	HN11B	Lingshui1	RAD-Seq	GENOMIC	Restriction Digest	paired	ILLUMINA	Illumina HiSeq X	fastq	HN11B_1.fq.gz	HN11B_2.fq.gz
SRR22243932	SRP406971	new	PRJNA896368	SAMN31543686	HN12B	Lingshui2	RAD-Seq	GENOMIC	Restriction Digest	paired	ILLUMINA	Illumina HiSeq X	fastq	HN12B_1.fq.gz	HN12B_2.fq.gz
SRR22243921	SRP406971	new	PRJNA896368	SAMN31543687	HN13B	Lingshui3	RAD-Seq	GENOMIC	Restriction Digest	paired	ILLUMINA	Illumina HiSeq X	fastq	HN13B_1.fq.gz	HN13B_2.fq.gz
SRR22243910	SRP406971	new	PRJNA896368	SAMN31543688	HN14B	Lingshui4	RAD-Seq	GENOMIC	Restriction Digest	paired	ILLUMINA	Illumina HiSeq X	fastq	HN14B_1.fq.gz	HN14B_2.fq.gz
SRR22243899	SRP406971	new	PRJNA896368	SAMN31543689	HN15B	Lingshui5	RAD-Seq	GENOMIC	Restriction Digest	paired	ILLUMINA	Illumina HiSeq X	fastq	HN15B_1.fq.gz	HN15B_2.fq.gz
SRR22243888	SRP406971	new	PRJNA896368	SAMN31543690	HN16B	Lingshui6	RAD-Seq	GENOMIC	Restriction Digest	paired	ILLUMINA	Illumina HiSeq X	fastq	HN16B_1.fq.gz	HN16B_2.fq.gz
SRR22243877	SRP406971	new	PRJNA896368	SAMN31543691	HN17B	Lingshui7	RAD-Seq	GENOMIC	Restriction Digest	paired	ILLUMINA	Illumina HiSeq X	fastq	HN17B_1.fq.gz	HN17B_2.fq.gz
SRR22243866	SRP406971	new	PRJNA896368	SAMN31543692	HN18B	Lingshui8	RAD-Seq	GENOMIC	Restriction Digest	paired	ILLUMINA	Illumina HiSeq X	fastq	HN18B_1.fq.gz	HN18B_2.fq.gz
SRR22243861	SRP406971	new	PRJNA896368	SAMN31543693	HN19B	Lingshui9	RAD-Seq	GENOMIC	Restriction Digest	paired	ILLUMINA	Illumina HiSeq X	fastq	HN19B_1.fq.gz	HN19B_2.fq.gz
SRR22243860	SRP406971	new	PRJNA896368	SAMN31543694	HN5B	Lingshui10	RAD-Seq	GENOMIC	Restriction Digest	paired	ILLUMINA	Illumina HiSeq X	fastq	HN5B_1.fq.gz	HN5B_2.fq.gz
SRR22243931	SRP406971	new	PRJNA896368	SAMN31543695	HN6B	Lingshui11	RAD-Seq	GENOMIC	Restriction Digest	paired	ILLUMINA	Illumina HiSeq X	fastq	HN6B_1.fq.gz	HN6B_2.fq.gz
SRR22243930	SRP406971	new	PRJNA896368	SAMN31543696	HN7B	Lingshui12	RAD-Seq	GENOMIC	Restriction Digest	paired	ILLUMINA	Illumina HiSeq X	fastq	HN7B_1.fq.gz	HN7B_2.fq.gz
SRR22243929	SRP406971	new	PRJNA896368	SAMN31543697	HN8B	Lingshui13	RAD-Seq	GENOMIC	Restriction Digest	paired	ILLUMINA	Illumina HiSeq X	fastq	HN8B_1.fq.gz	HN8B_2.fq.gz
SRR22243928	SRP406971	new	PRJNA896368	SAMN31543698	HN9B	Lingshui14	RAD-Seq	GENOMIC	Restriction Digest	paired	ILLUMINA	Illumina HiSeq X	fastq	HN9B_1.fq.gz	HN9B_2.fq.gz
SRR22243927	SRP406971	new	PRJNA896368	SAMN31543742	HP1	Haiphong1	RAD-Seq	GENOMIC	Restriction Digest	paired	ILLUMINA	Illumina HiSeq X	fastq	HP1_1.fq.gz	HP1_2.fq.gz
SRR22243926	SRP406971	new	PRJNA896368	SAMN31543743	HP10B	Haiphong2	RAD-Seq	GENOMIC	Restriction Digest	paired	ILLUMINA	Illumina HiSeq X	fastq	HP10B_1.fq.gz	HP10B_2.fq.gz
SRR22243925	SRP406971	new	PRJNA896368	SAMN31543744	HP11B	Haiphong3	RAD-Seq	GENOMIC	Restriction Digest	paired	ILLUMINA	Illumina HiSeq X	fastq	HP11B_1.fq.gz	HP11B_2.fq.gz
SRR22243924	SRP406971	new	PRJNA896368	SAMN31543745	HP12B	Haiphong4	RAD-Seq	GENOMIC	Restriction Digest	paired	ILLUMINA	Illumina HiSeq X	fastq	HP12B_1.fq.gz	HP12B_2.fq.gz
SRR22243923	SRP406971	new	PRJNA896368	SAMN31543746	HP13B	Haiphong5	RAD-Seq	GENOMIC	Restriction Digest	paired	ILLUMINA	Illumina HiSeq X	fastq	HP13B_1.fq.gz	HP13B_2.fq.gz
SRR22243922	SRP406971	new	PRJNA896368	SAMN31543747	HP14B	Haiphong6	RAD-Seq	GENOMIC	Restriction Digest	paired	ILLUMINA	Illumina HiSeq X	fastq	HP14B_1.fq.gz	HP14B_2.fq.gz
SRR22243920	SRP406971	new	PRJNA896368	SAMN31543748	HP15B	Haiphong7	RAD-Seq	GENOMIC	Restriction Digest	paired	ILLUMINA	Illumina HiSeq X	fastq	HP15B_1.fq.gz	HP15B_2.fq.gz
SRR22243919	SRP406971	new	PRJNA896368	SAMN31543749	HP16B	Haiphong8	RAD-Seq	GENOMIC	Restriction Digest	paired	ILLUMINA	Illumina HiSeq X	fastq	HP16B_1.fq.gz	HP16B_2.fq.gz
SRR22243918	SRP406971	new	PRJNA896368	SAMN31543750	HP17A	Haiphong9	RAD-Seq	GENOMIC	Restriction Digest	paired	ILLUMINA	Illumina HiSeq X	fastq	HP17A_1.fq.gz	HP17A_2.fq.gz
SRR22243917	SRP406971	new	PRJNA896368	SAMN31543751	HP18B	Haiphong10	RAD-Seq	GENOMIC	Restriction Digest	paired	ILLUMINA	Illumina HiSeq X	fastq	HP18B_1.fq.gz	HP18B_2.fq.gz
SRR22243916	SRP406971	new	PRJNA896368	SAMN31543752	HP2B	Haiphong11	RAD-Seq	GENOMIC	Restriction Digest	paired	ILLUMINA	Illumina HiSeq X	fastq	HP2B_1.fq.gz	HP2B_2.fq.gz
SRR22243915	SRP406971	new	PRJNA896368	SAMN31543753	HP3B	Haiphong12	RAD-Seq	GENOMIC	Restriction Digest	paired	ILLUMINA	Illumina HiSeq X	fastq	HP3B_1.fq.gz	HP3B_2.fq.gz
SRR22243914	SRP406971	new	PRJNA896368	SAMN31543754	HP4B	Haiphong13	RAD-Seq	GENOMIC	Restriction Digest	paired	ILLUMINA	Illumina HiSeq X	fastq	HP4B_1.fq.gz	HP4B_2.fq.gz
SRR22243913	SRP406971	new	PRJNA896368	SAMN31543755	HP5B	Haiphong14	RAD-Seq	GENOMIC	Restriction Digest	paired	ILLUMINA	Illumina HiSeq X	fastq	HP5B_1.fq.gz	HP5B_2.fq.gz
SRR22243912	SRP406971	new	PRJNA896368	SAMN31543756	HP6B	Haiphong15	RAD-Seq	GENOMIC	Restriction Digest	paired	ILLUMINA	Illumina HiSeq X	fastq	HP6B_1.fq.gz	HP6B_2.fq.gz
SRR22243911	SRP406971	new	PRJNA896368	SAMN31543757	HP7	Haiphong16	RAD-Seq	GENOMIC	Restriction Digest	paired	ILLUMINA	Illumina HiSeq X	fastq	HP7_1.fq.gz	HP7_2.fq.gz
SRR22243909	SRP406971	new	PRJNA896368	SAMN31543758	HP8B	Haiphong17	RAD-Seq	GENOMIC	Restriction Digest	paired	ILLUMINA	Illumina HiSeq X	fastq	HP8B_1.fq.gz	HP8B_2.fq.gz
SRR22243908	SRP406971	new	PRJNA896368	SAMN31543759	HP9B	Haiphong18	RAD-Seq	GENOMIC	Restriction Digest	paired	ILLUMINA	Illumina HiSeq X	fastq	HP9B_1.fq.gz	HP9B_2.fq.gz
SRR22243907	SRP406971	new	PRJNA896368	SAMN31543724	Z10A	Mischief1	RAD-Seq	GENOMIC	Restriction Digest	paired	ILLUMINA	Illumina HiSeq X	fastq	Z10A_1.fq.gz	Z10A_2.fq.gz
SRR22243906	SRP406971	new	PRJNA896368	SAMN31543725	Z13A	Mischief2	RAD-Seq	GENOMIC	Restriction Digest	paired	ILLUMINA	Illumina HiSeq X	fastq	Z13A_1.fq.gz	Z13A_2.fq.gz
SRR22243905	SRP406971	new	PRJNA896368	SAMN31543726	Z15A	Mischief3	RAD-Seq	GENOMIC	Restriction Digest	paired	ILLUMINA	Illumina HiSeq X	fastq	Z15A_1.fq.gz	Z15A_2.fq.gz
SRR22243904	SRP406971	new	PRJNA896368	SAMN31543727	Z17A	Mischief4	RAD-Seq	GENOMIC	Restriction Digest	paired	ILLUMINA	Illumina HiSeq X	fastq	Z17A_1.fq.gz	Z17A_2.fq.gz
SRR22243903	SRP406971	new	PRJNA896368	SAMN31543728	Z18A	Mischief5	RAD-Seq	GENOMIC	Restriction Digest	paired	ILLUMINA	Illumina HiSeq X	fastq	Z18A_1.fq.gz	Z18A_2.fq.gz
SRR22243902	SRP406971	new	PRJNA896368	SAMN31543729	Z19A	Mischief6	RAD-Seq	GENOMIC	Restriction Digest	paired	ILLUMINA	Illumina HiSeq X	fastq	Z19A_1.fq.gz	Z19A_2.fq.gz
SRR22243901	SRP406971	new	PRJNA896368	SAMN31543730	Z1A	Mischief7	RAD-Seq	GENOMIC	Restriction Digest	paired	ILLUMINA	Illumina HiSeq X	fastq	Z1A_1.fq.gz	Z1A_2.fq.gz
SRR22243900	SRP406971	new	PRJNA896368	SAMN31543731	Z27A	Mischief8	RAD-Seq	GENOMIC	Restriction Digest	paired	ILLUMINA	Illumina HiSeq X	fastq	Z27A_1.fq.gz	Z27A_2.fq.gz
SRR22243898	SRP406971	new	PRJNA896368	SAMN31543732	Z2A	Mischief9	RAD-Seq	GENOMIC	Restriction Digest	paired	ILLUMINA	Illumina HiSeq X	fastq	Z2A_1.fq.gz	Z2A_2.fq.gz
SRR22243897	SRP406971	new	PRJNA896368	SAMN31543733	Z33A	Mischief10	RAD-Seq	GENOMIC	Restriction Digest	paired	ILLUMINA	Illumina HiSeq X	fastq	Z33A_1.fq.gz	Z33A_2.fq.gz
SRR22243896	SRP406971	new	PRJNA896368	SAMN31543734	Z43A	Mischief11	RAD-Seq	GENOMIC	Restriction Digest	paired	ILLUMINA	Illumina HiSeq X	fastq	Z43A_1.fq.gz	Z43A_2.fq.gz
SRR22243895	SRP406971	new	PRJNA896368	SAMN31543735	Z44A	Mischief12	RAD-Seq	GENOMIC	Restriction Digest	paired	ILLUMINA	Illumina HiSeq X	fastq	Z44A_1.fq.gz	Z44A_2.fq.gz
SRR22243894	SRP406971	new	PRJNA896368	SAMN31543736	Z47A	Mischief13	RAD-Seq	GENOMIC	Restriction Digest	paired	ILLUMINA	Illumina HiSeq X	fastq	Z47A_1.fq.gz	Z47A_2.fq.gz
SRR22243893	SRP406971	new	PRJNA896368	SAMN31543737	Z51A	Mischief14	RAD-Seq	GENOMIC	Restriction Digest	paired	ILLUMINA	Illumina HiSeq X	fastq	Z51A_1.fq.gz	Z51A_2.fq.gz
SRR22243892	SRP406971	new	PRJNA896368	SAMN31543738	Z54A	Mischief15	RAD-Seq	GENOMIC	Restriction Digest	paired	ILLUMINA	Illumina HiSeq X	fastq	Z54A_1.fq.gz	Z54A_2.fq.gz
SRR22243891	SRP406971	new	PRJNA896368	SAMN31543739	Z57A	Mischief16	RAD-Seq	GENOMIC	Restriction Digest	paired	ILLUMINA	Illumina HiSeq X	fastq	Z57A_1.fq.gz	Z57A_2.fq.gz
SRR22243890	SRP406971	new	PRJNA896368	SAMN31543740	Z6A	Mischief17	RAD-Seq	GENOMIC	Restriction Digest	paired	ILLUMINA	Illumina HiSeq X	fastq	Z6A_1.fq.gz	Z6A_2.fq.gz
SRR22243889	SRP406971	new	PRJNA896368	SAMN31543741	Z8A	Mischief18	RAD-Seq	GENOMIC	Restriction Digest	paired	ILLUMINA	Illumina HiSeq X	fastq	Z8A_1.fq.gz	Z8A_2.fq.gz
SRR22243887	SRP406971	new	PRJNA896368	SAMN31543699	ZJ10A	Zhanjiang1	RAD-Seq	GENOMIC	Restriction Digest	paired	ILLUMINA	Illumina HiSeq X	fastq	ZJ10A_1.fq.gz	ZJ10A_2.fq.gz
SRR22243886	SRP406971	new	PRJNA896368	SAMN31543700	ZJ11A	Zhanjiang2	RAD-Seq	GENOMIC	Restriction Digest	paired	ILLUMINA	Illumina HiSeq X	fastq	ZJ11A_1.fq.gz	ZJ11A_2.fq.gz
SRR22243885	SRP406971	new	PRJNA896368	SAMN31543701	ZJ12A	Zhanjiang3	RAD-Seq	GENOMIC	Restriction Digest	paired	ILLUMINA	Illumina HiSeq X	fastq	ZJ12A_1.fq.gz	ZJ12A_2.fq.gz
SRR22243884	SRP406971	new	PRJNA896368	SAMN31543702	ZJ13A	Zhanjiang4	RAD-Seq	GENOMIC	Restriction Digest	paired	ILLUMINA	Illumina HiSeq X	fastq	ZJ13A_1.fq.gz	ZJ13A_2.fq.gz
SRR22243883	SRP406971	new	PRJNA896368	SAMN31543703	ZJ14A	Zhanjiang5	RAD-Seq	GENOMIC	Restriction Digest	paired	ILLUMINA	Illumina HiSeq X	fastq	ZJ14A_1.fq.gz	ZJ14A_2.fq.gz
SRR22243882	SRP406971	new	PRJNA896368	SAMN31543704	ZJ15A	Zhanjiang6	RAD-Seq	GENOMIC	Restriction Digest	paired	ILLUMINA	Illumina HiSeq X	fastq	ZJ15A_1.fq.gz	ZJ15A_2.fq.gz
SRR22243881	SRP406971	new	PRJNA896368	SAMN31543705	ZJ16A	Zhanjiang7	RAD-Seq	GENOMIC	Restriction Digest	paired	ILLUMINA	Illumina HiSeq X	fastq	ZJ16A_1.fq.gz	ZJ16A_2.fq.gz
SRR22243880	SRP406971	new	PRJNA896368	SAMN31543706	ZJ17A	Zhanjiang8	RAD-Seq	GENOMIC	Restriction Digest	paired	ILLUMINA	Illumina HiSeq X	fastq	ZJ17A_1.fq.gz	ZJ17A_2.fq.gz
SRR22243879	SRP406971	new	PRJNA896368	SAMN31543707	ZJ18A	Zhanjiang9	RAD-Seq	GENOMIC	Restriction Digest	paired	ILLUMINA	Illumina HiSeq X	fastq	ZJ18A_1.fq.gz	ZJ18A_2.fq.gz
SRR22243878	SRP406971	new	PRJNA896368	SAMN31543708	ZJ19A	Zhanjiang10	RAD-Seq	GENOMIC	Restriction Digest	paired	ILLUMINA	Illumina HiSeq X	fastq	ZJ19A_1.fq.gz	ZJ19A_2.fq.gz
SRR22243876	SRP406971	new	PRJNA896368	SAMN31543709	ZJ1A	Zhanjiang11	RAD-Seq	GENOMIC	Restriction Digest	paired	ILLUMINA	Illumina HiSeq X	fastq	ZJ1A_1.fq.gz	ZJ1A_2.fq.gz
SRR22243875	SRP406971	new	PRJNA896368	SAMN31543710	ZJ21A	Zhanjiang12	RAD-Seq	GENOMIC	Restriction Digest	paired	ILLUMINA	Illumina HiSeq X	fastq	ZJ21A_1.fq.gz	ZJ21A_2.fq.gz
SRR22243874	SRP406971	new	PRJNA896368	SAMN31543711	ZJ22A	Zhanjiang13	RAD-Seq	GENOMIC	Restriction Digest	paired	ILLUMINA	Illumina HiSeq X	fastq	ZJ22A_1.fq.gz	ZJ22A_2.fq.gz
SRR22243873	SRP406971	new	PRJNA896368	SAMN31543712	ZJ23A	Zhanjiang14	RAD-Seq	GENOMIC	Restriction Digest	paired	ILLUMINA	Illumina HiSeq X	fastq	ZJ23A_1.fq.gz	ZJ23A_2.fq.gz
SRR22243872	SRP406971	new	PRJNA896368	SAMN31543713	ZJ24A	Zhanjiang15	RAD-Seq	GENOMIC	Restriction Digest	paired	ILLUMINA	Illumina HiSeq X	fastq	ZJ24A_1.fq.gz	ZJ24A_2.fq.gz
SRR22243871	SRP406971	new	PRJNA896368	SAMN31543714	ZJ25A	Zhanjiang16	RAD-Seq	GENOMIC	Restriction Digest	paired	ILLUMINA	Illumina HiSeq X	fastq	ZJ25A_1.fq.gz	ZJ25A_2.fq.gz
SRR22243870	SRP406971	new	PRJNA896368	SAMN31543715	ZJ26A	Zhanjiang17	RAD-Seq	GENOMIC	Restriction Digest	paired	ILLUMINA	Illumina HiSeq X	fastq	ZJ26A_1.fq.gz	ZJ26A_2.fq.gz
SRR22243869	SRP406971	new	PRJNA896368	SAMN31543716	ZJ2A	Zhanjiang18	RAD-Seq	GENOMIC	Restriction Digest	paired	ILLUMINA	Illumina HiSeq X	fastq	ZJ2A_1.fq.gz	ZJ2A_2.fq.gz
SRR22243868	SRP406971	new	PRJNA896368	SAMN31543717	ZJ30A	Zhanjiang19	RAD-Seq	GENOMIC	Restriction Digest	paired	ILLUMINA	Illumina HiSeq X	fastq	ZJ30A_1.fq.gz	ZJ30A_2.fq.gz
SRR22243867	SRP406971	new	PRJNA896368	SAMN31543718	ZJ3A	Zhanjiang20	RAD-Seq	GENOMIC	Restriction Digest	paired	ILLUMINA	Illumina HiSeq X	fastq	ZJ3A_1.fq.gz	ZJ3A_2.fq.gz
SRR22243865	SRP406971	new	PRJNA896368	SAMN31543719	ZJ4A	Zhanjiang21	RAD-Seq	GENOMIC	Restriction Digest	paired	ILLUMINA	Illumina HiSeq X	fastq	ZJ4A_1.fq.gz	ZJ4A_2.fq.gz
SRR22243864	SRP406971	new	PRJNA896368	SAMN31543720	ZJ5A	Zhanjiang22	RAD-Seq	GENOMIC	Restriction Digest	paired	ILLUMINA	Illumina HiSeq X	fastq	ZJ5A_1.fq.gz	ZJ5A_2.fq.gz
SRR22243863	SRP406971	new	PRJNA896368	SAMN31543721	ZJ7A	Zhanjiang23	RAD-Seq	GENOMIC	Restriction Digest	paired	ILLUMINA	Illumina HiSeq X	fastq	ZJ7A_1.fq.gz	ZJ7A_2.fq.gz
SRR22243862	SRP406971	new	PRJNA896368	SAMN31543722	ZJ9A	Zhanjiang24	RAD-Seq	GENOMIC	Restriction Digest	paired	ILLUMINA	Illumina HiSeq X	fastq	ZJ9A_1.fq.gz	ZJ9A_2.fq.gz
